# Supplementary material
Source: PubMed Central journal article supplement (PMC3443602)
Supplement: NIHMS401316-supplement-1_si_001.pdf [file NIHMS401316-supplement-1_si_001.pdf]

Supporting Information for:

Synthetic Applications and Inversion Dynamics of Configurationally Stable 2-Lithio-2-aryl-  
Pyrrolidines and -Piperidines

*Timothy K. Beng, Jin Sun Woo, and Robert E. Gawley\**

*Department of Chemistry and Biochemistry, University of  
Arkansas, Fayetteville, AR, 72701, USA*

*[bgawley@uark.edu](mailto:bgawley@uark.edu)*

*Contents:*

|                                                                                                                   |     |
|-------------------------------------------------------------------------------------------------------------------|-----|
| 1. Structures .....                                                                                               | S3  |
| 2. General procedures .....                                                                                       | S4  |
| 3. Arylation of <i>N</i> -Boc-2-lithiopiperidine: Synthesis of ( <i>R</i> )- <i>N</i> -Boc-2-arylpiperidines..... | S8  |
| 3.1. With bromobenzene .....                                                                                      | S8  |
| 3.2. With 4-bromoveratrole.....                                                                                   | S8  |
| 3.3. With <i>para</i> -bromobenzonitrile .....                                                                    | S9  |
| 3.4. With 1-bromonaphthalene .....                                                                                | S9  |
| 4. Lithiation-substitution of ( <i>R</i> )- <i>N</i> -Boc-2-phenylpiperidine with several electrophiles.....      | S10 |
| 4.1. With methanol- $d_1$ .....                                                                                   | S10 |
| 4.2. With dimethyl sulfate.....                                                                                   | S12 |
| 4.3. With trimethylsilyl chloride.....                                                                            | S18 |
| 4.4. With ethyl chloroformate .....                                                                               | S22 |
| 4.5. With acetone- $d_6$ .....                                                                                    | S26 |
| 4.6. With allyl bromide .....                                                                                     | S28 |
| 4.7. With benzyl bromide.....                                                                                     | S30 |
| 5. Lithiation-substitution of other ( <i>R</i> )- <i>N</i> -Boc-2-arylpiperidines.....                            | S34 |

|                                                                                 |      |
|---------------------------------------------------------------------------------|------|
| 5.1. ( <i>R</i> )- <i>N</i> -Boc-2-(3,4-dimethoxyphenyl)piperidine.....         | S34  |
| 5.2. ( <i>R</i> )- <i>N</i> -Boc-2-(4- <i>tert</i> -butylphenyl)piperidine..... | S38  |
| 5.3. ( <i>R</i> )- <i>N</i> -Boc-2-(4-cyanophenyl)piperidine .....              | S38  |
| 5.4. ( <i>R</i> )- <i>N</i> -Boc-2-(1-naphthyl)piperidine.....                  | S42  |
| 6. Synthesis of <i>N</i> -Boc-2-arylpyrrolidines .....                          | S48  |
| 7. Lithiation-substitution of <i>N</i> -Boc-2-phenylpyrrolidine.....            | S49  |
| 8. Lithiation-substitution of other <i>N</i> -Boc-2-arylpyrrolidines.....       | S71  |
| 9. Kinetics of enantiomerization of <b>24</b> .....                             | S83  |
| 10. Kinetics of enantiomerization of <b>8</b> .....                             | S96  |
| 11. References.....                                                             | S103 |

## 1. Structures

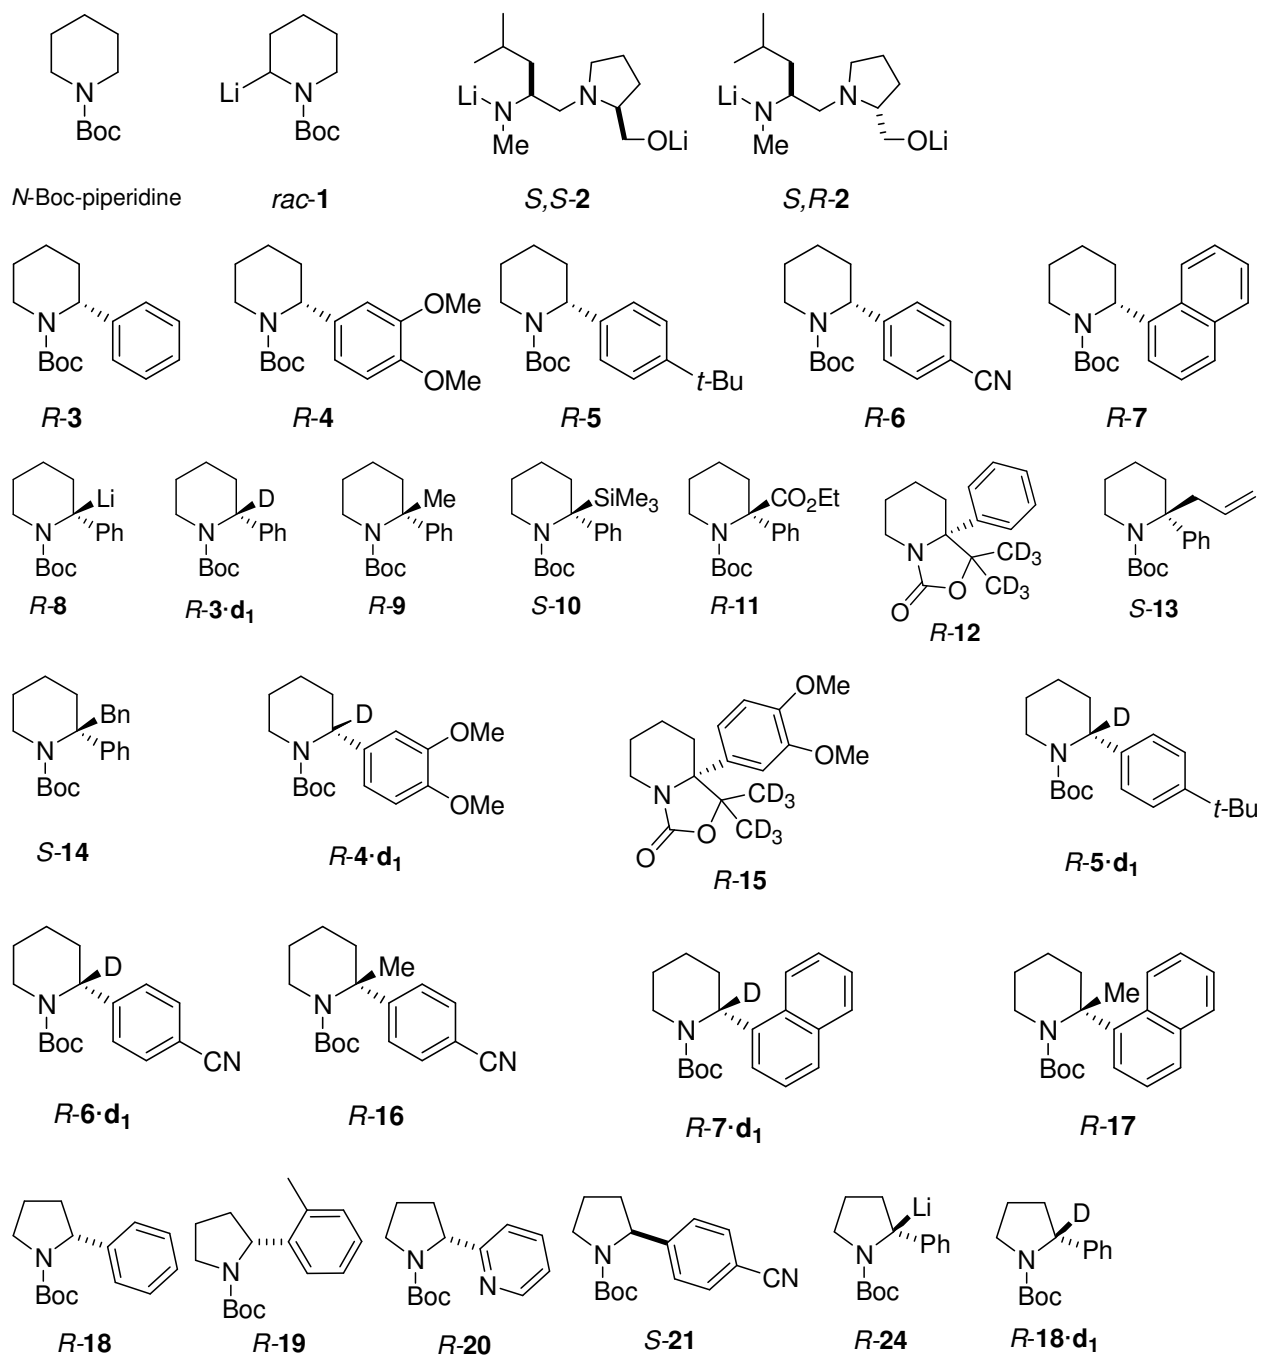

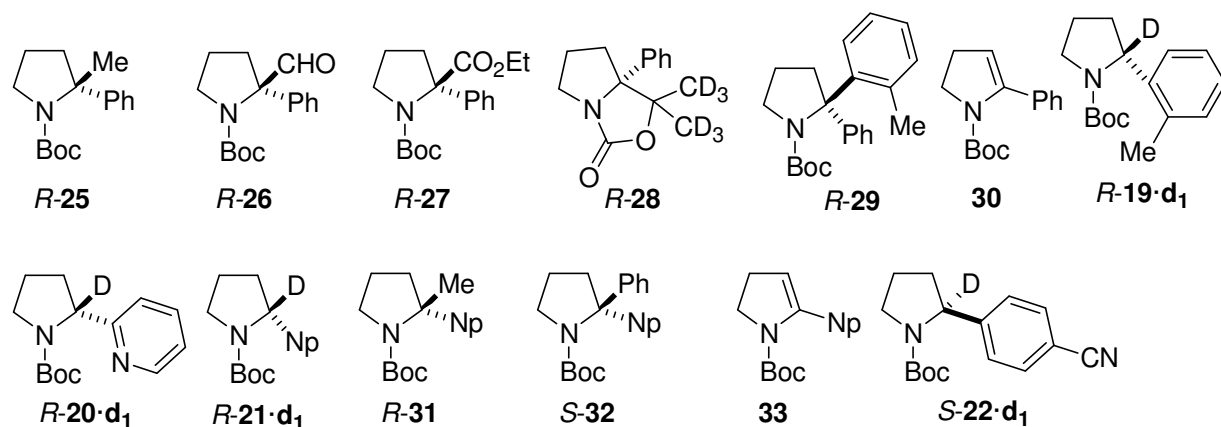

## 2. Experimental Section

All experiments involving organolithium reagents were carried out under an inert atmosphere of argon or nitrogen and using freshly distilled solvents. Et<sub>2</sub>O and THF were distilled from sodium benzophenone ketyl. TMEDA and the conjugate acid of (*S,S*)-**2** was purified by Kugelrohr distillation from CaH<sub>2</sub>. Solutions of ZnCl<sub>2</sub> (1 M in Et<sub>2</sub>O or THF) were obtained from commercial sources. Solid ZnCl<sub>2</sub>, CuCN, LiCl were flame-dried under vacuum prior to use. The concentration of commercial *s*-BuLi (solution in cyclohexane) and *n*-BuLi were determined prior to use by No-D NMR spectroscopy.<sup>1</sup> All electrophiles that were not newly purchased were distilled immediately before use. Newly purchased electrophiles with less than 98.5% purity were also distilled immediately before use. Column chromatography was performed on silica gel (230-400 mesh). Thin-layer chromatography (TLC) was performed on silica plates. Visualization of the TLC plates was aided by UV irradiation at 254 nm or by KMnO<sub>4</sub> staining. For enantiomer ratio (er) analyses, authentic racemic compounds were used to establish the method of separation of the enantiomers. The temperature was controlled by a thermostatted cooling coil and all reported temperatures were internal to a reaction vessel. The enantiomer ratios were determined by CSP-SFC. The following chiral columns were utilized; Regis Technologies Pirkle-Whelk-O-1 and Daicel Chiralcel OD-H. In some cases the enantiomer ratios were determined by CSP-GC on a β-cyclodextrin-permethylated 120 fused silica capillary column [30 m × 0.25 mm i.d., 20% permethylated β-cyclodextrin in SPB-35 poly(35% diphenyl/65% dimethyl)siloxane. Unless otherwise indicated, <sup>1</sup>H, <sup>13</sup>C, DEPT-135, COSY 45, and HMQC NMR spectra were acquired using CDCl<sub>3</sub> as solvent at ambient temperature. Chemical shifts are quoted in parts per million (ppm).

*N*-Boc-piperidine, the alcohol precursors to ligands (*S,S*)-**2** and (*S,R*)-**2** were synthesized according to previously reported methods.<sup>2,3</sup>

### **2.1. General Procedure A: Catalytic Dynamic Resolution (CDR) of 2-lithio-*N*-Boc-piperidine followed by Transmetalation and Palladium-catalyzed Arylation**

In an oven-dried, septum-capped 25 mL round bottom flask equipped with a stir bar, freshly distilled *N*-Boc-piperidine (1 mmol, 1.0 equiv) and freshly distilled TMEDA (4 mmol, 4.0 equiv) were dissolved in freshly distilled Et<sub>2</sub>O under argon. The solution was cooled to –80 °C and *s*-BuLi (1.2 mmol, 1.2 equiv) was added slowly by means of a syringe, down the side of the flask, over a ten minute period. The mixture was stirred for 3 h to effect deprotonation, affording *rac*-**1**·TMEDA. The freshly distilled diamino alcohol, precursor of (*S,S*)-**2** (0.05 mmol, 5 mol%) in Et<sub>2</sub>O was treated with *s*-BuLi (10 mol%). After complete deprotonation of *N*-Boc-piperidine as noted by MS, the preformed alkoxide (*S,S*)-**2** was added and the flask was quickly transferred to a second thermostatted bath at –45 °C, and allowed to stir for 5 h. The mixture was cooled to –80 °C and a solution of ZnCl<sub>2</sub> (0.6 mL, 1.0 M solution in Et<sub>2</sub>O, 0.6 equiv), was added slowly over a ten minute period and the mixture was stirred for 30 minutes followed by warming to room temperature. After 30 minutes, Pd(OAc)<sub>2</sub> (0.04 mmol, 4 mol%), *t*-Bu<sub>3</sub>P·HBF<sub>4</sub> (0.08 mmol, 8 mol%) and the aryl bromide (1.1 mmol, 1.1 equiv) were added sequentially. After stirring for 18 h at room temperature, NH<sub>4</sub>OH (5 mL, 10% aqueous solution) was added dropwise and the mixture was stirred for 30 minutes. The resulting slurry was filtered through Celite and rinsed with 5 mL Et<sub>2</sub>O. The filtrate was washed with 1 M HCl<sub>(aq)</sub> (10 mL), then with water (2 x 5 mL), dried over Na<sub>2</sub>SO<sub>4</sub> and evaporated under reduced pressure to obtain the crude product. The er was determined before and after purification by column chromatography.

**Note:** The purity of reagents (especially the *chiral ligand*) is critical to achieving a resolution under either catalytic or stoichiometric conditions! We occasionally face this challenge as well.

### **2.2. General Procedure B: Lithiation of (*R*)-*N*-Boc-2-arylpiperidine or pyrrolidine followed by direct trapping with the electrophile**

To an oven-dried, septum-capped round bottom flask equipped with a stir bar, was added freshly distilled TMEDA (4.0 equiv) and Et<sub>2</sub>O under argon. The solution was cooled to –80 °C and a solution of *s*-BuLi in cyclohexane (1.0 equiv) was added (note 1). A precooled solution of the *N*-Boc-2-arylpiperidine (1.0 equiv) in Et<sub>2</sub>O was added to the flask containing the TMEDA/*s*-BuLi mixture. After 30 min at this temperature, the mixture was quenched with the electrophile (~1.1

to 1.5 equiv). After 2 – 16 h, MeOH (note 2) was added and the mixture was stirred for 5 min. After warming to room temperature, 2 M HCl was added. The layers were separated and the aqueous layer was extracted with Et<sub>2</sub>O. The combined organic layers were dried over MgSO<sub>4</sub> and evaporated to obtain the crude product. The er was determined before and after purification by column chromatography.

**Note 1:** Cooling the *s*-BuLi before substrate addition obviates the need for slow addition. Using GC-MS analysis, we detect very small amounts (if any) of the byproducts formed by attack of *s*-BuLi on the Boc-group.

**Note 2:** In some cases, MeOH was added after warming to room temperature.

### **2.3. General Procedure C: Lithiation of (*R*)-*N*-Boc-2-arylpiperidine followed by Copper-Mediated Allylation or Benzylation**

To an oven-dried, septum-capped round bottom flask equipped with a stir bar, was added freshly distilled TMEDA (4.0 equiv) and Et<sub>2</sub>O under argon. The solution was cooled to –80 °C and a solution of *s*-BuLi in cyclohexane (1.0 equiv) was added. A precooled solution of the *N*-Boc-2-arylpiperidine (1.0 equiv) in Et<sub>2</sub>O was added to the flask containing the TMEDA/*s*-BuLi mixture. After 30 min, a solution of ZnCl<sub>2</sub> (1.3 equiv, 1.0 M in Et<sub>2</sub>O) was added slowly. After 30 min, a solution of CuCN·2LiCl [prepared from CuCN (1.2 equiv) and LiCl (2.5 equiv)] in THF was added. After 30 min, allyl bromide or benzyl bromide (1.1 equiv) was added. The mixture was allowed to stir for 10 h at this temperature prior to addition of MeOH and warming to room temperature. A solution of NH<sub>4</sub>Cl was added and the aqueous layer was extracted with Et<sub>2</sub>O. The combined organic layers were dried over Na<sub>2</sub>SO<sub>4</sub> and evaporated to give the crude product. The er was determined before and after purification by column chromatography.

### **2.4. General Procedure D: Lithiation of *N*-Boc-protected arylpiperidine with MeOD (or other electrophile): Screening reactions where only GC conversions are reported.**

To an oven-dried, septum-capped 5 mL vial equipped with a stir bar, was added freshly distilled TMEDA (0.5 mL, 0.24 M solution in Et<sub>2</sub>O, 4.0 equiv), *N*-Boc-2-arylpiperidine (0.5 mL, 0.06 M solution in Et<sub>2</sub>O, 1.0 equiv) under argon. It was cooled to –80 °C and a solution of *s*-BuLi in cyclohexane (1.0 equiv) was added slowly. After 30 min, 0.10 mL of CH<sub>3</sub>OD (or the desired screening electrophile) was added. The mixture was diluted with freshly distilled Et<sub>2</sub>O (*ca* 1 mL). The ethereal layer was filtered through Celite. The sample was placed in a GC vial and analyzed by GC-MS for deuterium incorporation using chemical ionization (in some cases

electron impact ionization was utilized due to technical difficulties with the CI source). When the deprotonation is complete, there is a noticeable shift of the protonated molecular ion peak from  $MH^+$  to  $MH^++1$ . In most cases, the base peak was utilized for analytical purposes. The sample was also analyzed by CSP-SFC for er evaluation.

### **2.5. General Procedure E: Preparation of *N*-Boc-(arylmethyl)-(3-chloro) propylamines.<sup>4</sup>**

To a suspension of NaH (800 mg, 60% dispersion in mineral oil), washed with three portions of hexane, in THF (40 mL) was added *N*-Boc-3-chloropropylamine (2.06 g, 10 mmol 1.0 equiv) in THF (10 mL) and the arylmethyl bromide (15 mmol). The suspension was heated at reflux for 8 h. Water (20 mL) was added, and the solution was extracted with Et<sub>2</sub>O (3 x 40 mL). The combined organic layers were washed with water (20 mL), dried over MgSO<sub>4</sub>, and evaporated to give the crude product, which was purified by chromatography.

### **2.6. General Procedure F: Lithiation-cyclization of *N*-Boc-(arylmethyl)-(3-chloro) propylamines in the presence of (–)-sparteine: Synthesis of (*S*)-*N*-Boc-2-arylpyrrolidines.<sup>4</sup>**

To an oven-dried, septum-capped round bottom flask equipped with a stir bar, was added freshly distilled (–)-sparteine (1.5 equiv) and freshly distilled toluene under argon. The solution was cooled to –80 °C and a solution of *s*-BuLi in cyclohexane (1.5 equiv) was added. A precooled solution of the *N*-Boc-(arylmethyl)-(3-chloro) propylamine (1.0 equiv) in toluene was added to the flask containing the sparteine/*s*-BuLi mixture. After 7 h at this temperature, H<sub>2</sub>O and Et<sub>2</sub>O were added sequentially. The layers were separated and the aqueous layer was extracted with Et<sub>2</sub>O. The combined organic layers were washed with 5% H<sub>3</sub>PO<sub>4</sub> and with H<sub>2</sub>O, dried over MgSO<sub>4</sub> and evaporated under reduced pressure to obtain the crude product. The er was determined before and after purification by column chromatography.

**Note:** A similar procedure was used to synthesize racemic *N*-Boc-2-arylpyrrolidines for facilitation of er analysis by CSP-SFC. In such cases TMEDA was used in place of (–)-sparteine and the reaction time was shortened to 3 h.

### **2.7. General Procedure G: Lithiation-Substitution of *N*-Boc-protected arylpyrrolidine with MeOD: Screening reactions where only GC conversions are reported.**

To an oven-dried, septum-capped 5 mL vial equipped with a stir bar, was added freshly distilled TMEDA (0.5 mL, 0.06 M solution in Et<sub>2</sub>O, 1.0 equiv), the desired aryl pyrrolidine (0.5 mL, 0.06 M solution in Et<sub>2</sub>O, 1.0 equiv) under argon. It was cooled to –60 °C and a pre-titrated (by No-D NMR) solution of *n*-BuLi in hexanes (2.00 M, 1.0 equiv) was added down the side of the vial by

means of a microlitre syringe. After 3 h, 0.10 mL of CH<sub>3</sub>OD, stored over molecular sieves, was added. The mixture was diluted with freshly distilled Et<sub>2</sub>O (*ca* 1 mL). The ethereal layer was filtered through Celite, placed in a GC vial and analyzed by GC-MS for deuterium incorporation using chemical ionization (in some cases electron impact ionization was utilized due to technical difficulties with the CI source). The crude mixture was also analyzed by CSP-SFC for er evaluation. When the deprotonation is complete, there is a noticeable shift of the protonated molecular ion peak from MH<sup>+</sup> to MH<sup>+</sup>+1. In most cases, the base peak was utilized for analytical purposes.

## 2.8. General Procedure H: Lithiation of (*R*)-*N*-Boc-2-arylpiperidine followed by direct trapping with the electrophile

To an oven-dried, septum-capped round bottom flask equipped with a stir bar, was added freshly distilled TMEDA (1.0 equiv) and Et<sub>2</sub>O under argon. The mixture was cooled to -60 °C and a solution of *n*-BuLi in hexanes (1.0 equiv) was added. A precooled solution of the *N*-Boc-2-arylpiperidine (1.0 equiv) in Et<sub>2</sub>O was added to the flask containing the TMEDA/*n*-BuLi mixture. After 3 h at -60 °C, the mixture was quenched with the electrophile (~1.1 to 1.5 equiv). After 2 – 16 h, depending on the electrophile, MeOH was added and the mixture was stirred for 5 min. After warming to room temperature, 2 M HCl was added. The layers were separated and the aqueous layer was extracted with Et<sub>2</sub>O. The combined organic layers were dried over MgSO<sub>4</sub> and evaporated to obtain the crude product. The er was determined before and after column chromatography.

## 3. Synthesis of (*R*)-*N*-Boc-2-arylpiperidines

In the wake of recent publications from O'Brien et al<sup>5</sup> and from Knochel and coworkers<sup>6</sup>, we have slightly modified the previously reported procedure for the enantioselective arylation of *N*-Boc-piperidine. The minor change is the decrease in the amounts of ZnCl<sub>2</sub> and the aryl bromide.

### 3.1. (*R*)-*N*-Boc-2-phenylpiperidine

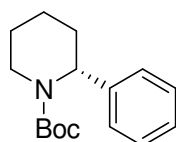

*R*-3

Using **General Procedure A**, *N*-Boc-piperidine (3700 mg, 20 mmol), TMEDA (12 mL, 80.0 mmol, 4.0 equiv), Et<sub>2</sub>O (100 mL), *s*-BuLi (24 mL, 1.0 M, 24 mmol, 1.2 equiv), the alcohol



precursor of (*S,S*)-**2** (214 mg, 1.0 mmol, 5 mol%, in 4.0 mL Et<sub>2</sub>O pretreated with freshly titrated *s*-BuLi), ZnCl<sub>2</sub> (12 mL, 1 M solution in Et<sub>2</sub>O, 0.6 equiv), phenyl bromide (2.6 mL, 22 mmol, 1.1 equiv), Pd(OAc)<sub>2</sub> (200 mg, 0.8 mmol, 4 mol%) and *t*-Bu<sub>3</sub>P·HBF<sub>4</sub> (460 mg, 1.6 mmol, 8 mol%) gave the crude product as an oil. Purification by silica gel column chromatography eluting with hexane-EtOAc (94:6) afforded 3.7 g of the pure product as an oil in 71% yield and 96:4 er; spectroscopic data as previously reported.<sup>3</sup>

### 3.2. (*R*)-*N*-Boc-2-(3,4-dimethoxy)phenylpiperidine

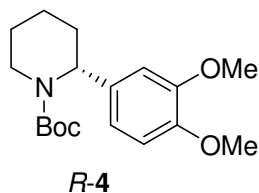

Using **General Procedure A**, *N*-Boc-piperidine (740 mg, 4 mmol), TMEDA (2.4 mL, 16.0 mmol, 4.0 equiv), Et<sub>2</sub>O (20 mL), *s*-BuLi (3.4 mL, 1.4 M, 4.8 mmol, 1.2 equiv), the alcohol precursor of (*S,S*)-**2** (43 mg, 0.2 mmol, 5 mol%, in 1.0 mL Et<sub>2</sub>O pretreated with freshly titrated *s*-BuLi), ZnCl<sub>2</sub> (2.4 mL, 1 M solution in Et<sub>2</sub>O, 0.6 equiv), 4-bromoveratrole (0.64 mL, 4.4 mmol, 1.1 equiv), Pd(OAc)<sub>2</sub> (40 mg, 0.16 mmol, 4 mol%) and *t*-Bu<sub>3</sub>P·HBF<sub>4</sub> (92 mg, 0.32 mmol, 8 mol%) gave the crude product as an oil. Purification by silica gel column chromatography eluting with hexane-EtOAc (85:15) afforded 990 mg of the pure product as an oil in 73% yield and 97:3 er; spectroscopic data as previously reported.<sup>3</sup>

### 3.3. (*R*)-*N*-Boc-2-(4-cyano)phenylpiperidine

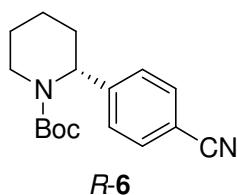

Using **General Procedure A**, *N*-Boc-piperidine (740 mg, 4 mmol), TMEDA (2.4 mL, 16.0 mmol, 4.0 equiv), Et<sub>2</sub>O (20 mL), *s*-BuLi (4.0 mL, 1.2 M, 4.8 mmol, 1.2 equiv), the alcohol precursor of (*S,S*)-**2** (43 mg, 0.2 mmol, 5 mol%, in 1.0 mL Et<sub>2</sub>O pretreated with freshly titrated *s*-BuLi), ZnCl<sub>2</sub> (2.4 mL, 1 M solution in Et<sub>2</sub>O, 0.6 equiv), 4-bromobenzonitrile (797 mg, 4.4 mmol, 1.1 equiv), Pd(OAc)<sub>2</sub> (40 mg, 0.16 mmol, 4 mol%) and *t*-Bu<sub>3</sub>P·HBF<sub>4</sub> (92 mg, 0.32 mmol, 8 mol%) gave the crude product as an oil. Purification by silica gel column chromatography eluting with hexane-EtOAc (90:10) afforded 790 mg of the pure product as an oil in 69% yield and 91:9 er; spectroscopic data as previously reported.<sup>3</sup>

### 3.4. (*R*)-*N*-Boc-2-(1-naphthyl)piperidine

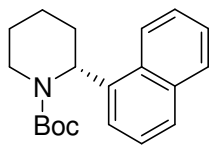

*R*-7

Using **General Procedure A**, *N*-Boc-piperidine (740 mg, 4 mmol), TMEDA (2.4 mL, 16.0 mmol, 4.0 equiv), Et<sub>2</sub>O (20 mL), *s*-BuLi (4.8 mL, 1.0 M, 4.8 mmol, 1.2 equiv), the alcohol precursor of (*S,S*)-**2** (43 mg, 0.2 mmol, 5 mol%, in 1.0 mL Et<sub>2</sub>O pretreated with freshly titrated *s*-BuLi), ZnCl<sub>2</sub> (2.4 mL, 1 M solution in Et<sub>2</sub>O, 0.6 equiv), 1-bromonaphthalene (0.6 mL, 4.4 mmol, 1.1 equiv), Pd(OAc)<sub>2</sub> (40 mg, 0.16 mmol, 4 mol%) and *t*-Bu<sub>3</sub>P·HBF<sub>4</sub> (92 mg, 0.32 mmol, 8 mol%) gave the crude product as an oil. Purification by silica gel column chromatography eluting with hexane-EtOAc (60:40) afforded 871 mg of the pure product as an amorphous solid in 70% yield and 97:3 er; spectroscopic data as previously reported.<sup>3</sup>

### 4. Lithiation-substitution of (*R*)-*N*-Boc-2-phenylpiperidine with several electrophiles

#### 4.1. With MeOD

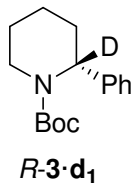

*R*-3-*d*<sub>1</sub>

Using **General Procedure D**, *R*-3 of 96:4 er and 0.1 mL MeOD showed complete deuteration. There is a noticeable shift of the protonated base peak from *m/z* 206 for **3** to *m/z* 207 for **3**·*d*<sub>1</sub>.

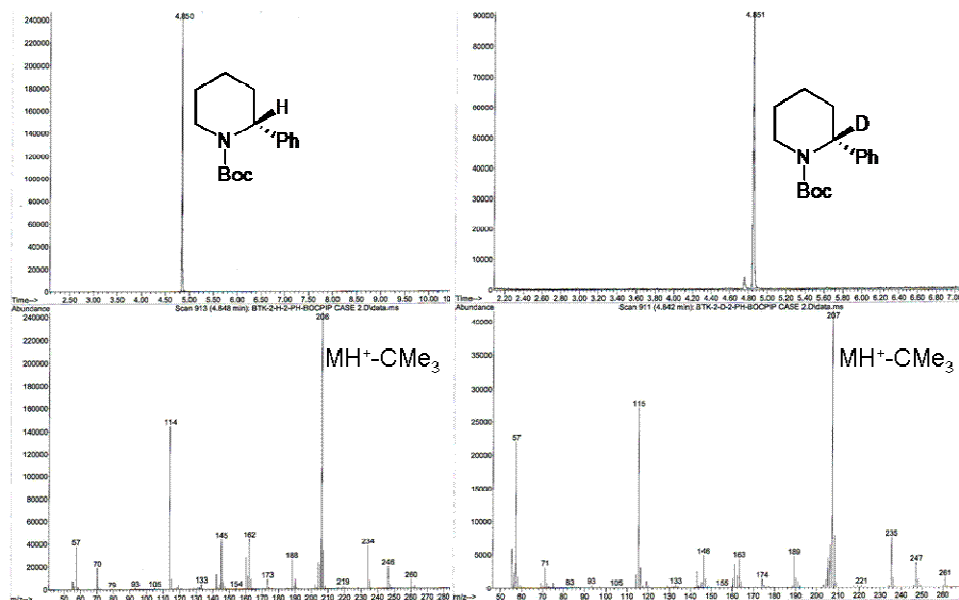

**Note 1:** Although, we observed complete formation of organolithium **8** in the absence of a ligand after 60 min at  $-80\text{ }^{\circ}\text{C}$ , we add excess TMEDA to enhance the configurational stability of the benzylic organolithium (see Figure below) and to speed up the lithiation.

**Note 2:** It is absolutely necessary to minimize the amount of excess *s*-BuLi in order to avoid undesirable lithiation at C-6. The absence of a byproduct with *m/z* 208 clearly means that no simultaneous deuteration at C-2 and C-6 occurred under the reaction conditions.

**Note 3:** Lithiation at higher temperatures resulted in a complex mixture due to the possibility of attack on the Boc-group by *s*-BuLi and due to enhanced possibility of lithiation at C-6.

**Note 4:** The lithiation can be carried out using *n*-BuLi at  $-80\text{ }^{\circ}\text{C}$  but longer reaction times ( $>2\text{ h}$ ) or higher temperatures are required.

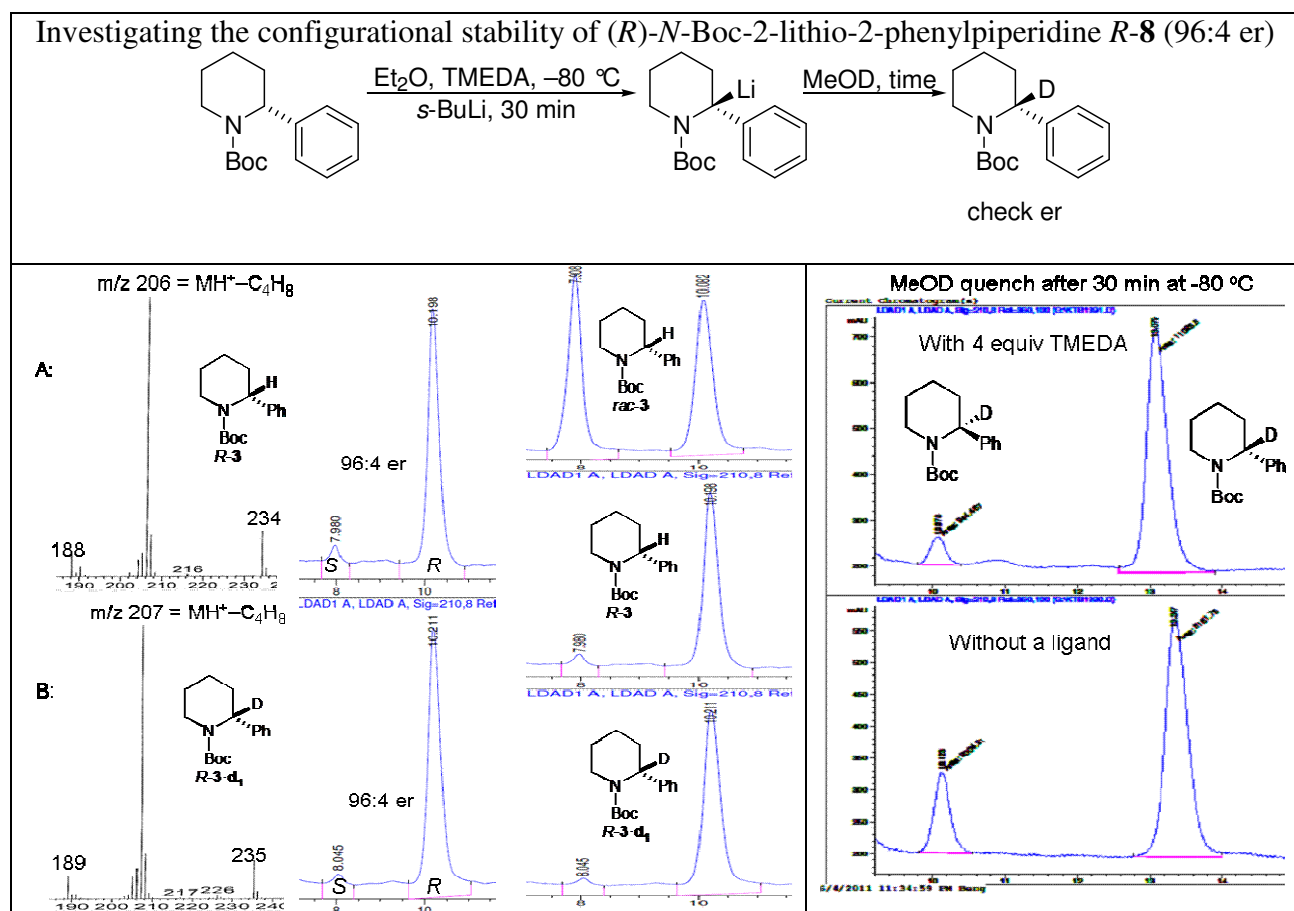

## 4.2. With Me<sub>2</sub>SO<sub>4</sub>

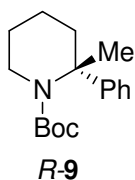

Using **General Procedure B**, *R-3* of 96:4 er (261 mg, 1.0 mmol), TMEDA (0.6 mL, 4.0 mmol, 4.0 equiv), Et<sub>2</sub>O (10 mL), *s*-BuLi (1.0 mL, 1.0 mmol, 1.0 M, 1.0 equiv), Me<sub>2</sub>SO<sub>4</sub> (0.15 mL, 1.5 mmol, 1.5 equiv) for 18 h prior to addition of 2 mL MeOH, gave the crude product as an oil. Purification by silica gel chromatography eluting with hexane-EtOAc (93:7) afforded 217 mg of *R-9* as an oil in 79% yield and 95:5 er. All other spectroscopic data as reported for *rac-9*.<sup>7</sup> The enantiomer ratio was evaluated by CSP-SFC, monitoring at 210 nm, by comparison with an authentic racemic sample, under the following column conditions: **Column:** Pirkle Whelk-O-1, **Flow Rate** = 1.0 mL/min, **Polarity Modifier** = 3.0% EtOH. The minor enantiomer elutes after ~10.4 min and the major elutes after ~12.4 min.

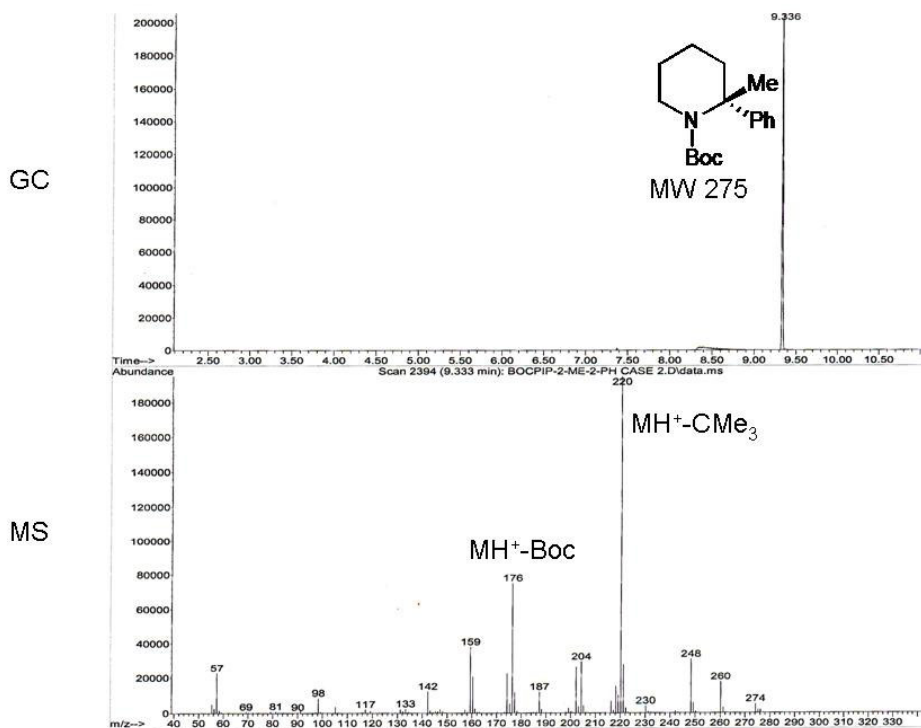

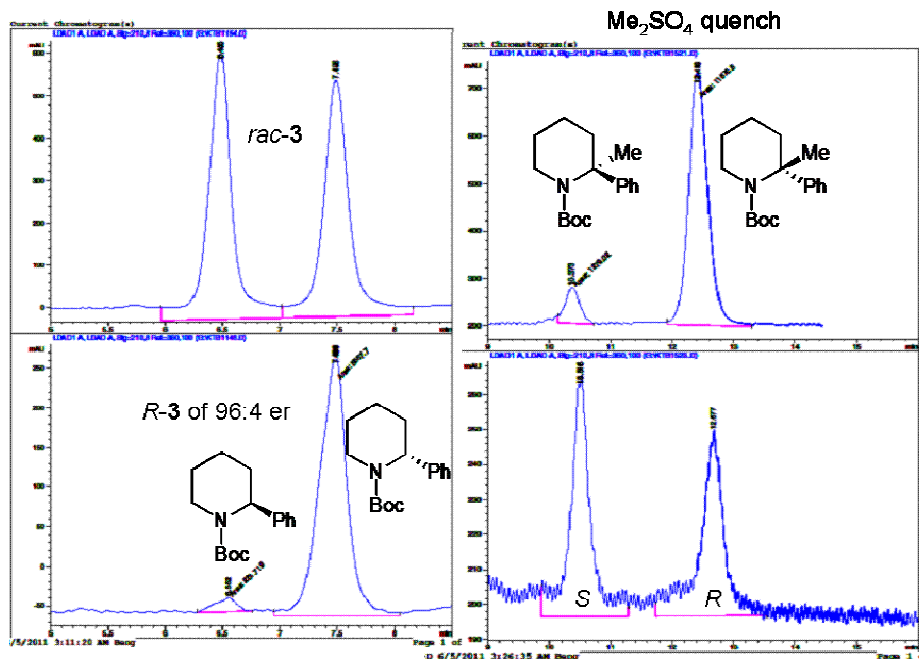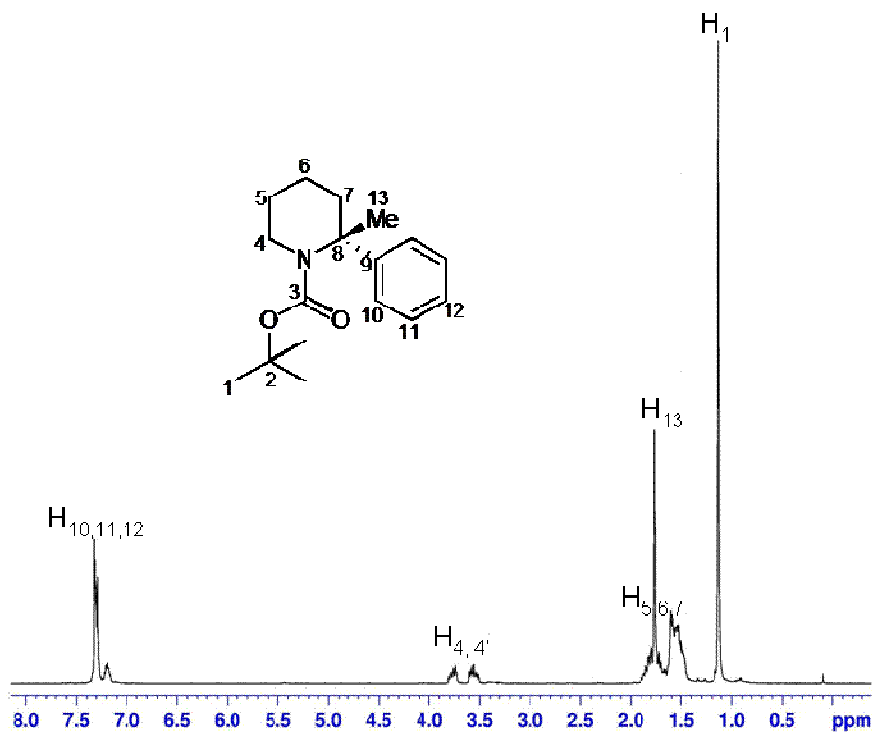

Current Data Parameters  
 NAME: Boc-BocPip-2-Ph-2-Me  
 EXPNO: 5  
 PROCNO: 1

F2 - Acquisition Parameters  
 Date\_: 20110810  
 Time: 5.42  
 INSTRUM: spect  
 PROBRG: 6 nm PABBO DS-  
 PULPROG: zgpg30  
 TD: 65536  
 SCLVNT: CDCl<sub>3</sub>  
 NS: 18  
 DS: 0  
 SWH: 6172.439 Hz  
 FIDRES: 0.094190 Hz  
 AQ: 5.3084660 sec  
 RG: 181  
 DW: 81.000 usec  
 DE: 6.00 usec  
 IE: 205.1 K  
 DI: 1.0000000 sec  
 MCREST: 0.0000000 sec  
 MCWRR: 0.01500000 sec

===== CHANNEL f1 =====  
 NUC1: <sup>1</sup>H  
 P1: 12.20 usec  
 PL1: -1.00 dB  
 SFO1: 300.1318134 MHz

F2 - Processing parameters  
 SI: 32768  
 SF: 300.1300000 MHz  
 WDW: EM  
 SSB: 0  
 LB: 0.30 Hz  
 GB: 0  
 PC: 1.40

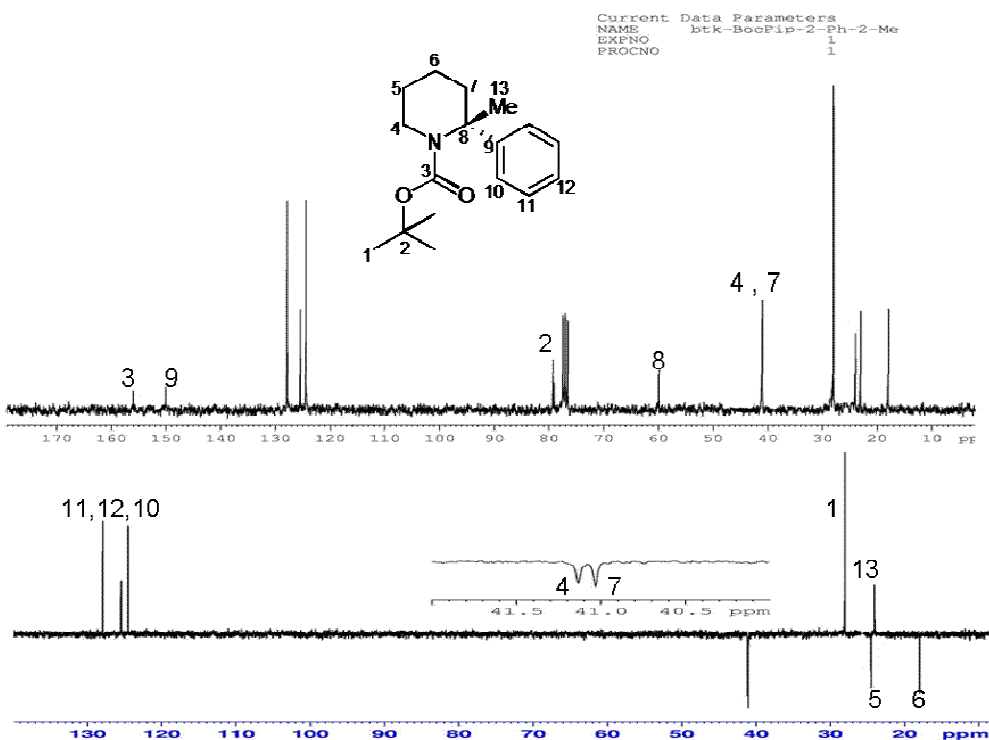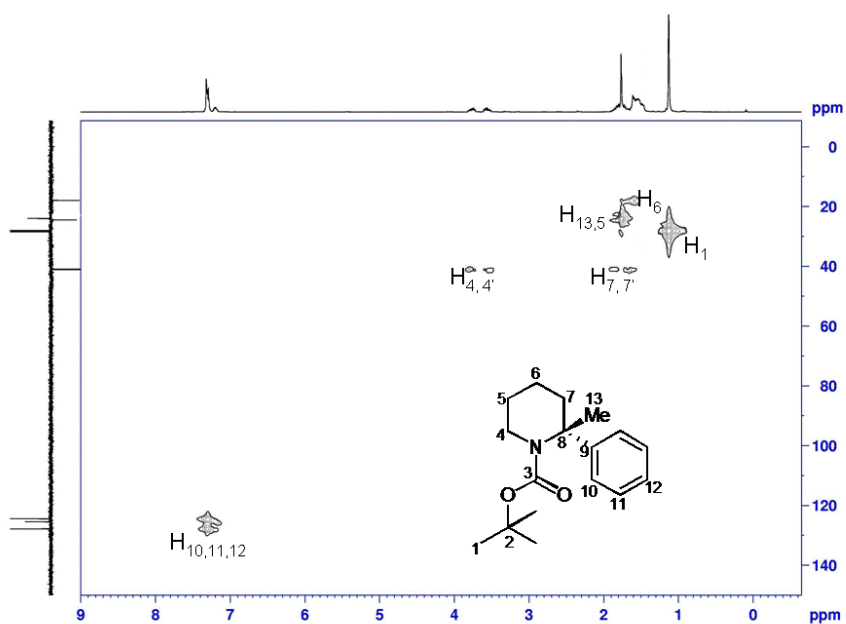

### Boc-deprotection

To a solution of *R*-**9** (138 mg, 0.5 mmol, 1.0 equiv) in anhydrous MeOH (2 mL) at 0 °C, was added SOCl<sub>2</sub> (0.1 mL) dropwise. The mixture was stirred for 6 h and then concentrated under high vacuum to give the desired product as the hydrochloride salt. It was then basified to pH 12

with 2 M NaOH(aq) and extracted with CH<sub>2</sub>Cl<sub>2</sub>, (3 x 5 mL), dried over Na<sub>2</sub>SO<sub>4</sub> and evaporated to give 83 g of the free amine in 94% yield,  $[\alpha]_D^{22} -21$  ( $c=0.5$ , CH<sub>2</sub>Cl<sub>2</sub>), lit<sup>8</sup>. for enantiopure deprotected *R*-**9**  $[\alpha]_D^{22} -18$  ( $c$  0.33, CH<sub>2</sub>Cl<sub>2</sub>), all other data as reported.<sup>8</sup>

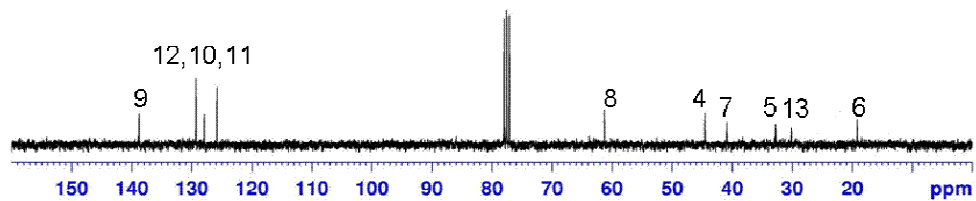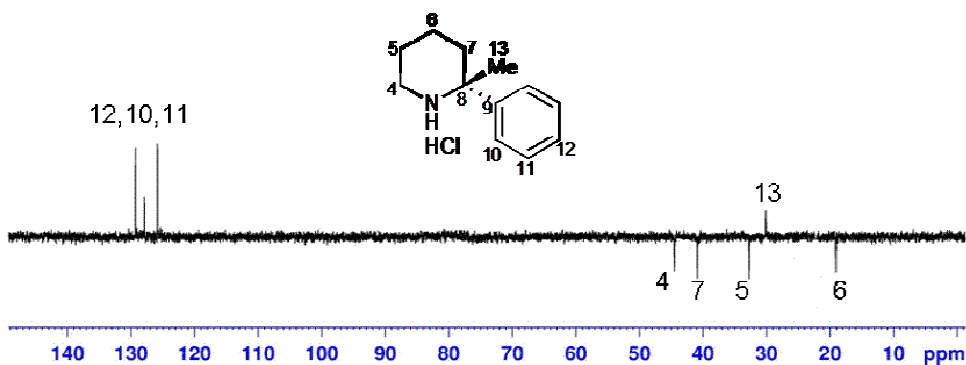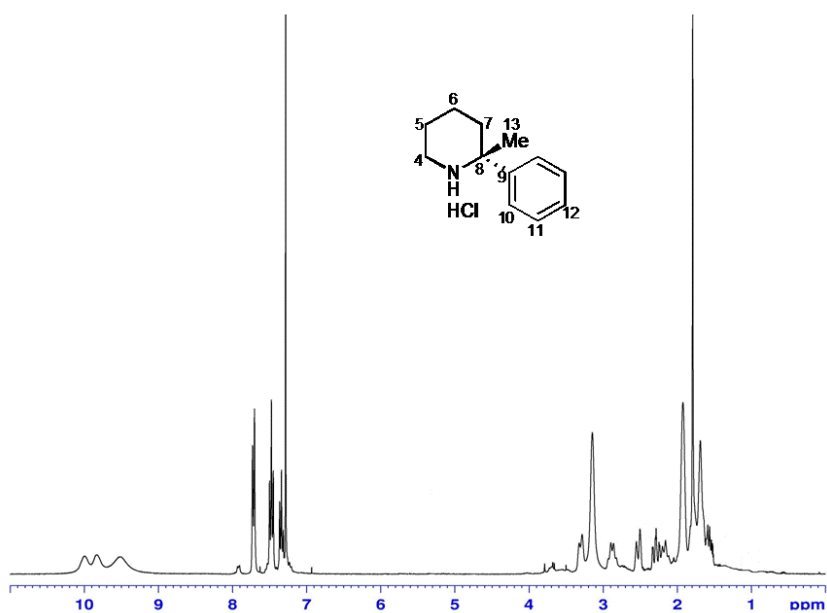

Spectral data for the free base:

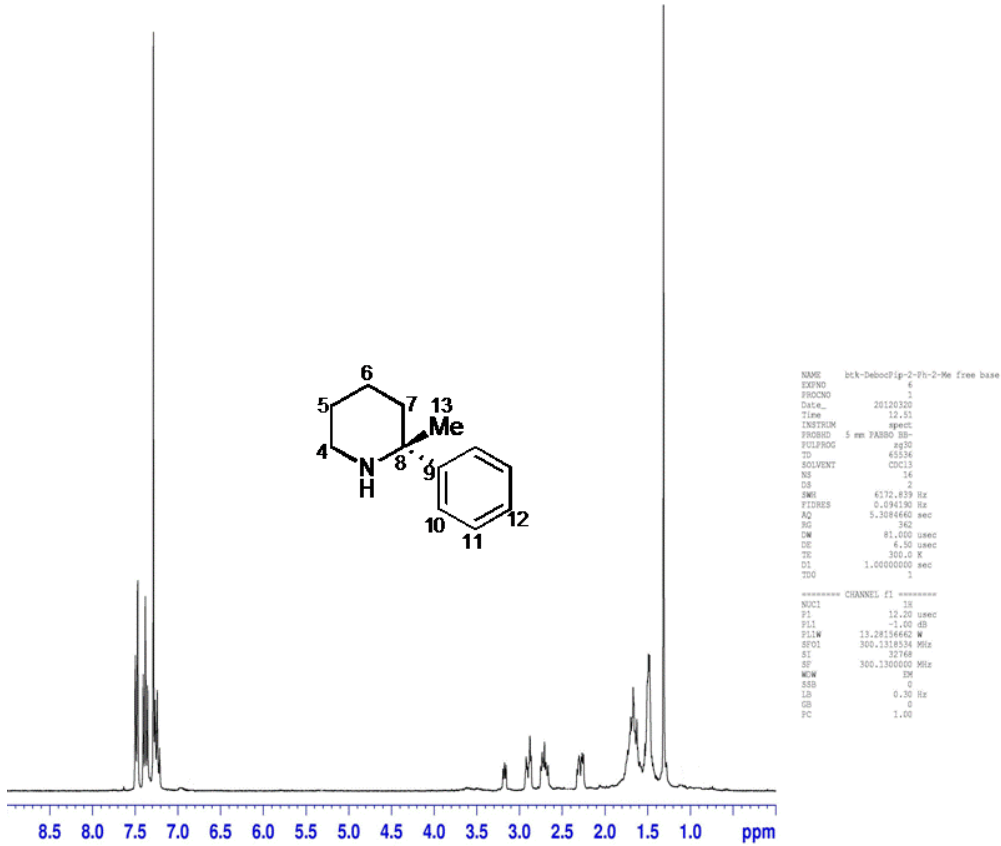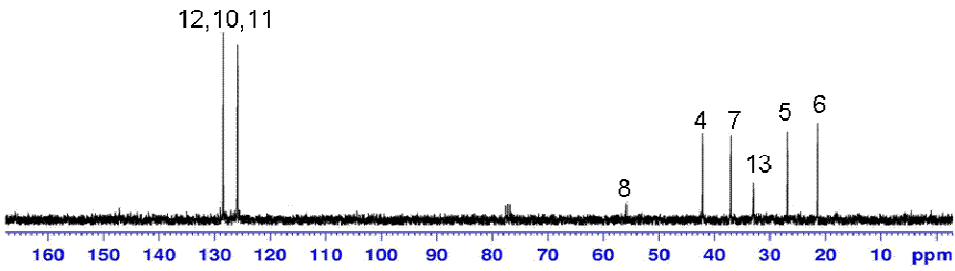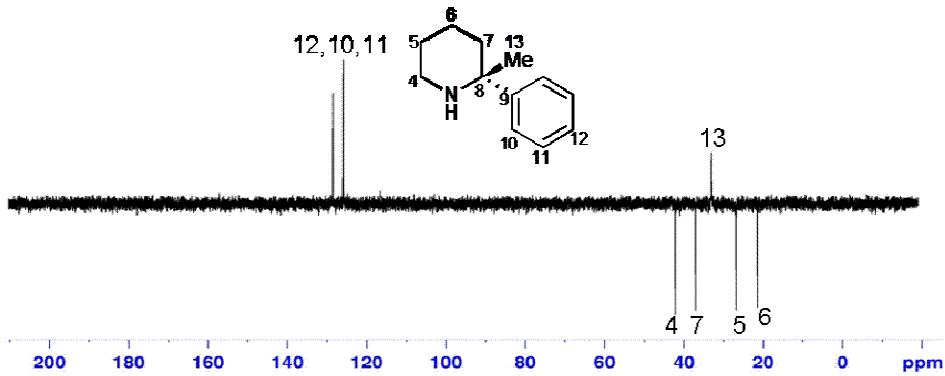



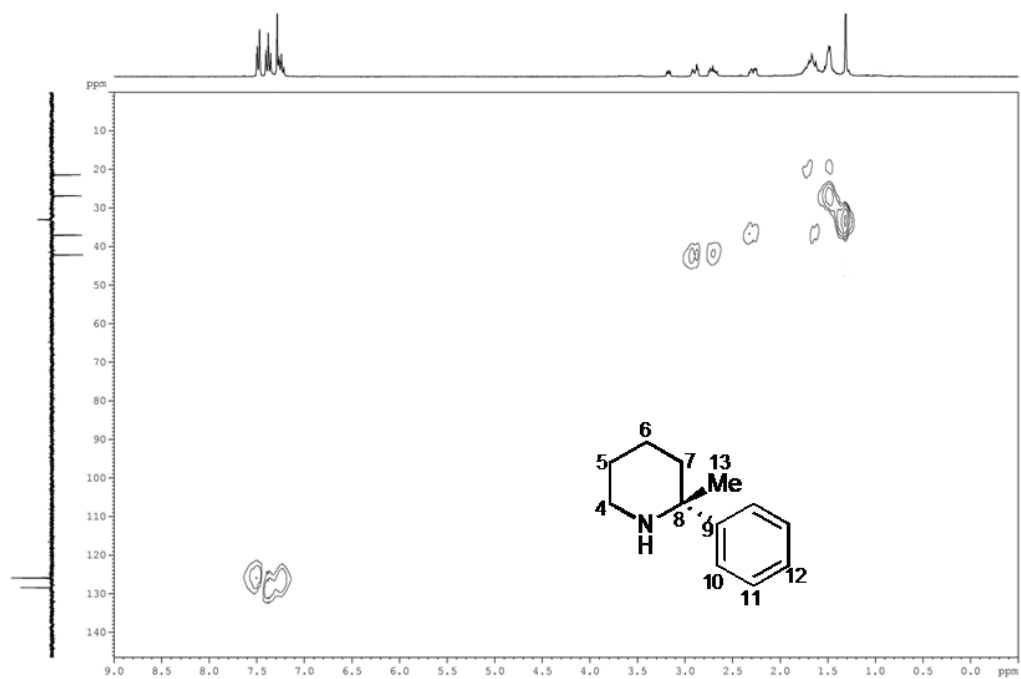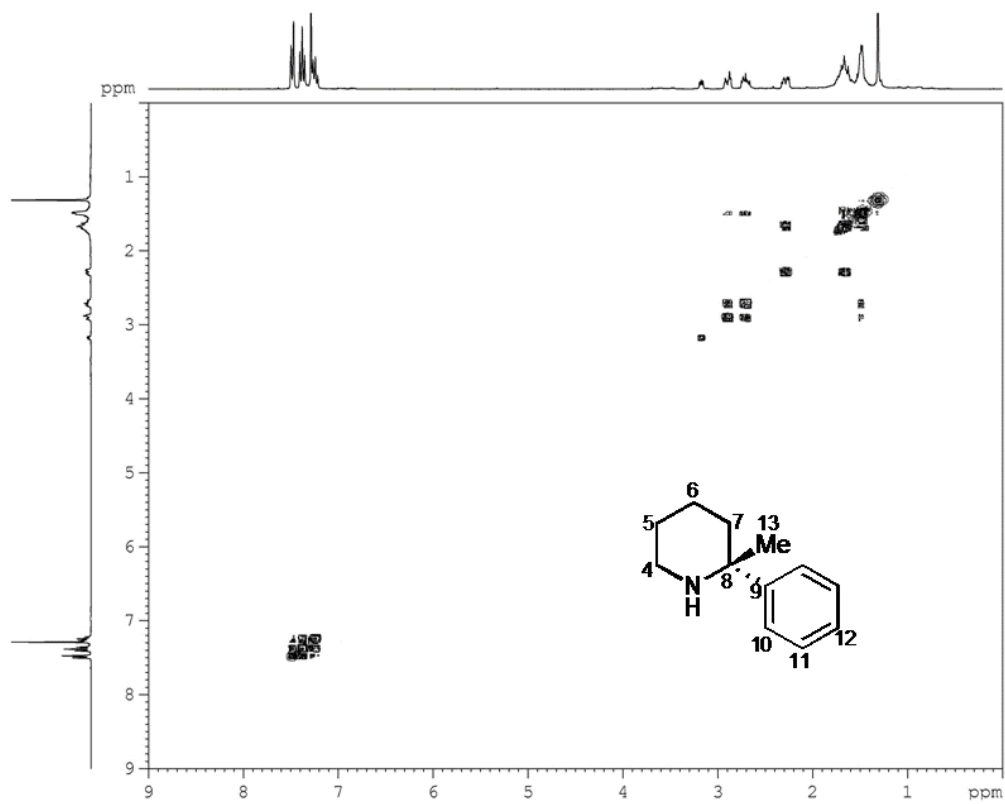

### 4.3. With TMSCl

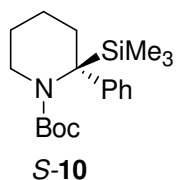

Using **General Procedure B**, *R-3* of 96:4 er (261 mg, 1.0 mmol), TMEDA (0.6 mL, 4.0 mmol, 4.0 equiv), Et<sub>2</sub>O (10 mL), *s*-BuLi (1.0 mL, 1.0 mmol, 1.0 M, 1.0 equiv), Me<sub>3</sub>SiCl (144 mg, 1.2 mmol, 1.2 equiv) for 4 h prior to addition of 2 mL MeOH and warming to rt, gave the crude product as an oil. Purification by silica gel chromatography eluting with hexane-EtOAc (90:10) afforded 293 mg of *S-10* as an oil in 88% yield and 96:4 er. <sup>1</sup>H NMR (300 MHz, CDCl<sub>3</sub>) δ 7.63–7.05 (5H, m, Ph), 3.95 (1H, br, NCH), 2.77–2.45 (3H, m), 1.95–1.22 (13H, m), 0.21 (9H, s, 3 x CH<sub>3</sub>) <sup>13</sup>C NMR (75.5 MHz, CDCl<sub>3</sub>) δ = 156.3 (C=O), 142.1 (C), 128.0 (CH), 127.1 (CH), 124.7 (CH), 79.3 (C), 57.0 (C), 41.9 (CH<sub>2</sub>), 30.1 (CH<sub>2</sub>), 28.5 (3 x CH<sub>3</sub>), 26.0 (CH<sub>2</sub>), 20.0 (CH<sub>2</sub>) and 0.9 (3 x CH<sub>3</sub>). The enantiomer ratio was evaluated by CSP-SFC, monitoring at 210 nm, by comparison with an authentic racemic sample, under the following column conditions: **Column:** Pirkle Whelk-O-1, **Flow Rate** = 1.5 mL/min, **Polarity Modifier** = 1.5% EtOH. The minor enantiomer elutes after ~7.3 min and the major elutes after ~8.2 min.

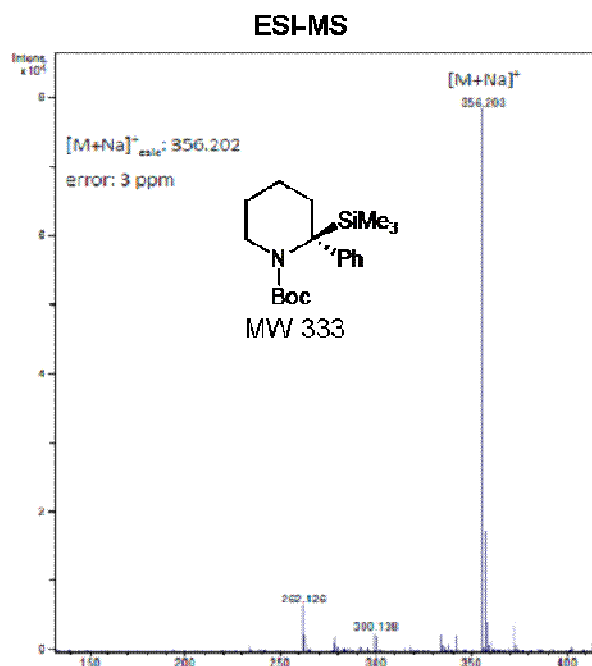

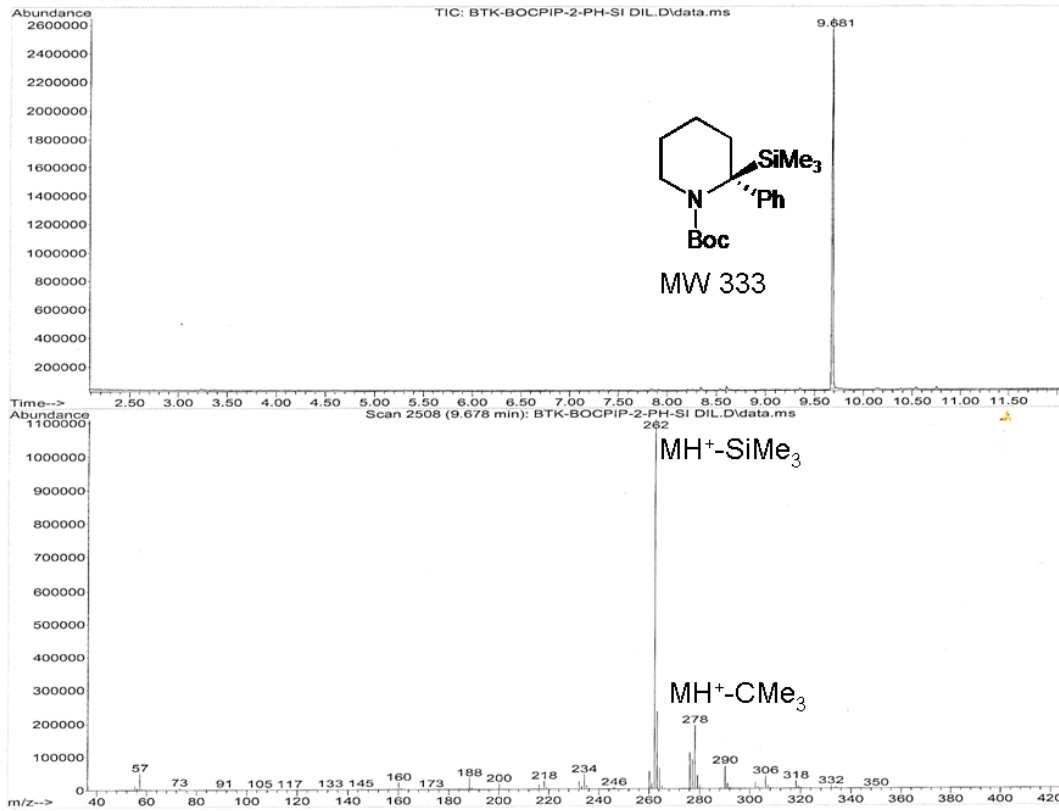

TMSCl quench

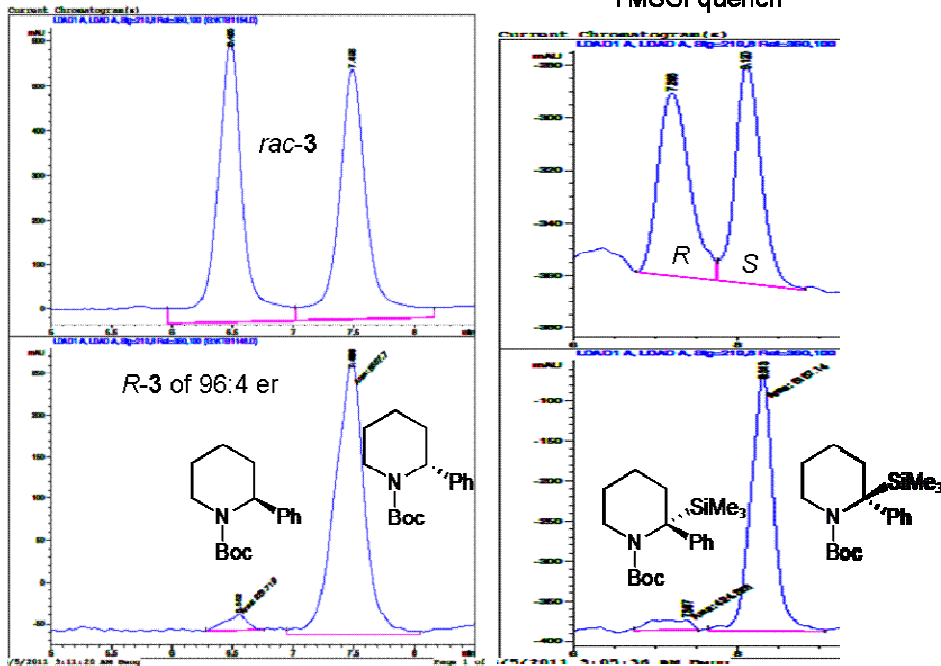

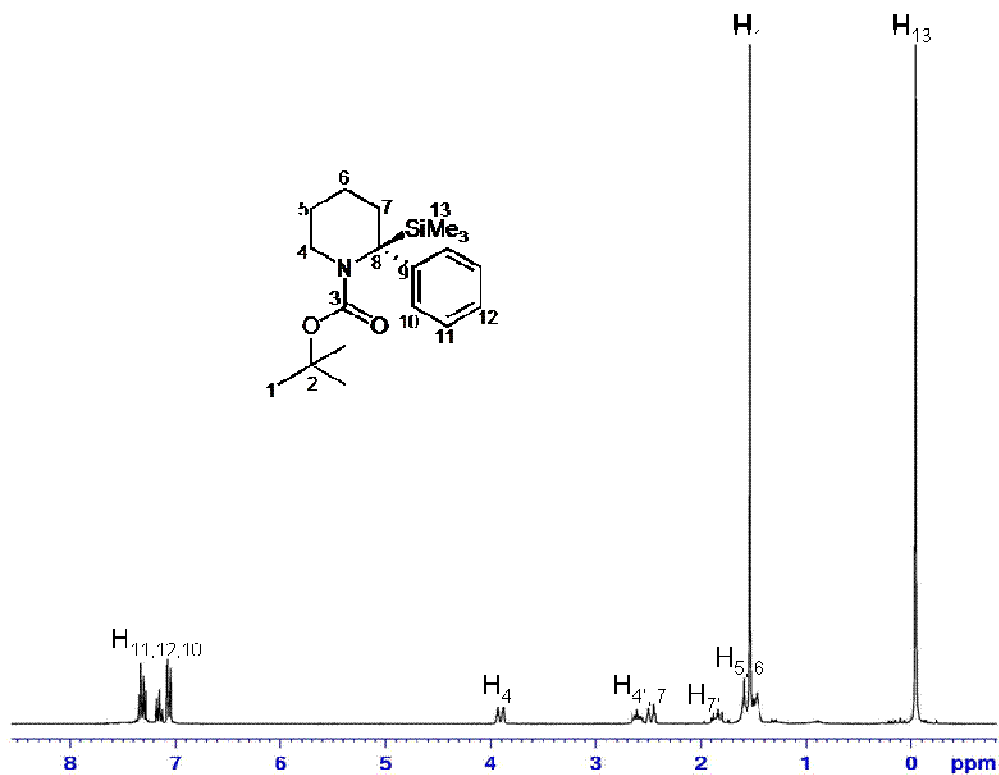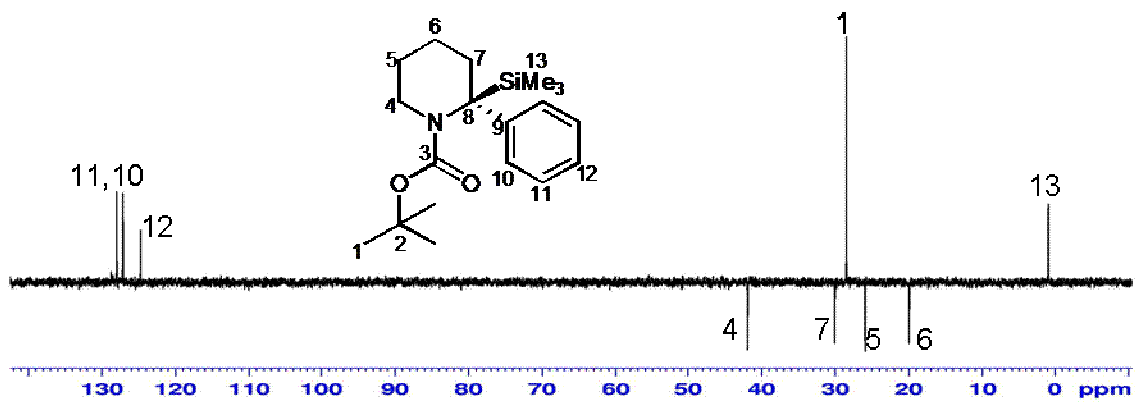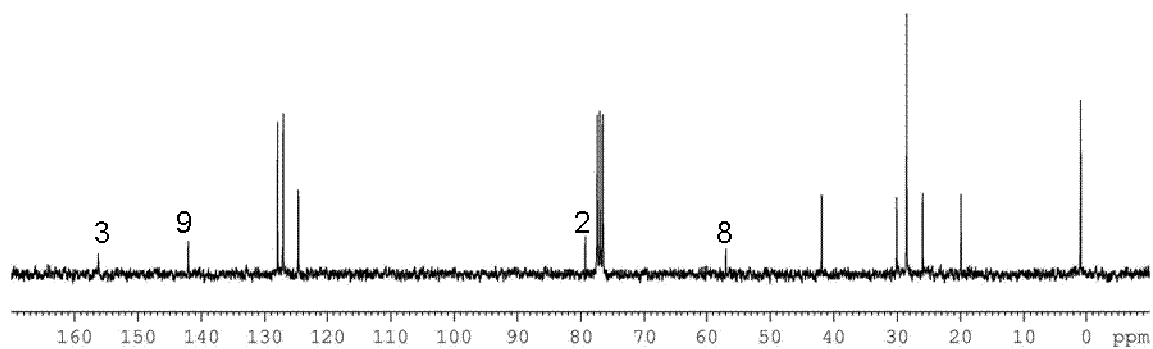

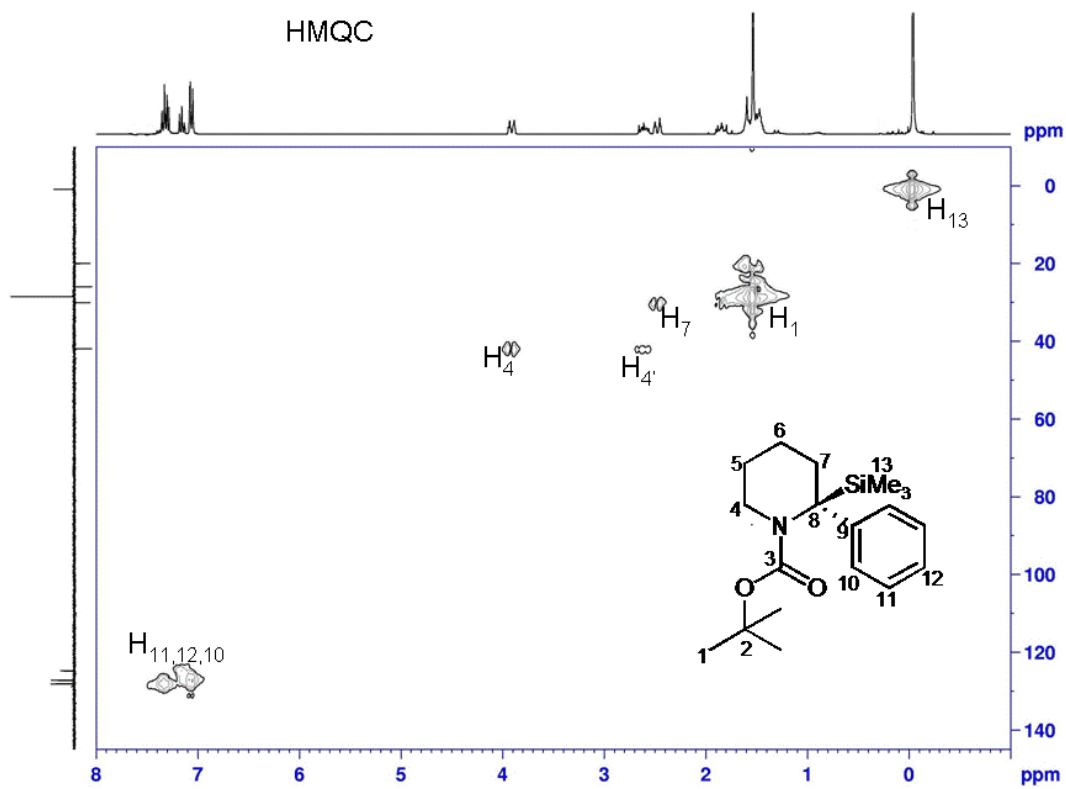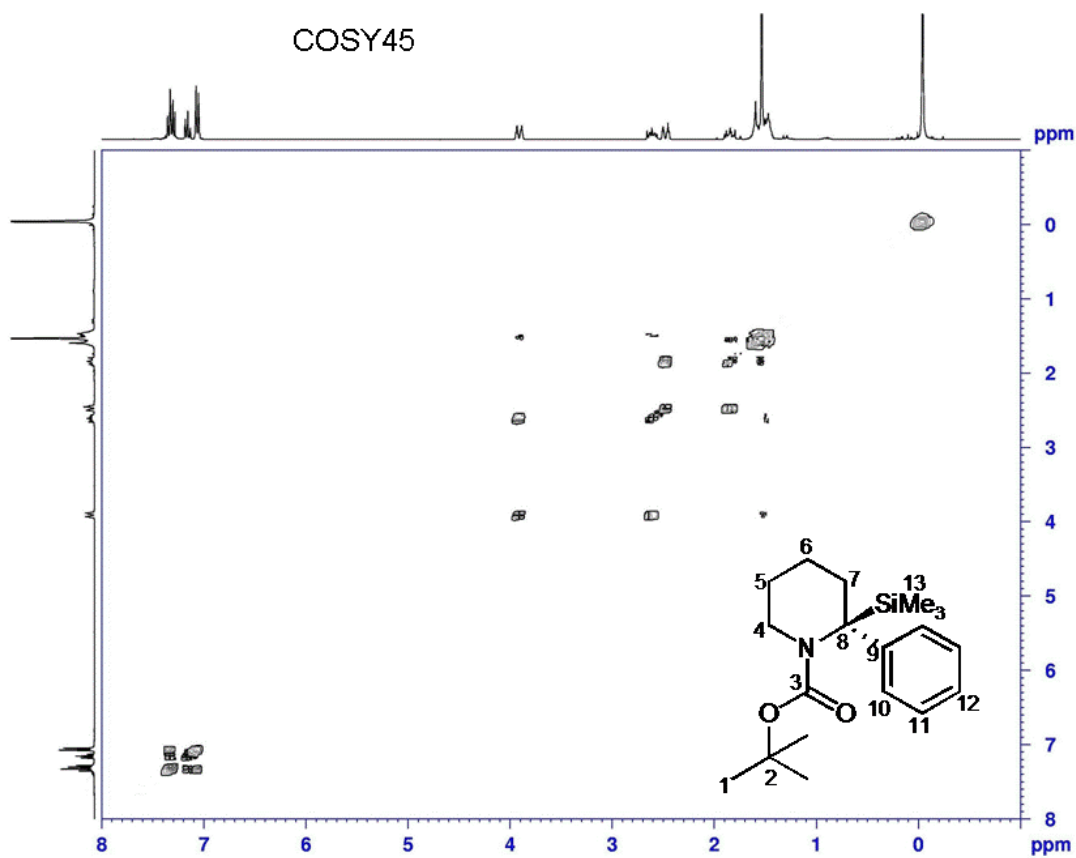

#### 4.4. With EtOCOCl

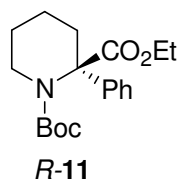

Using **General Procedure B**, *R-3* of 96:4 er (261 mg, 1.0 mmol), TMEDA (0.6 mL, 4.0 mmol, 4.0 equiv), Et<sub>2</sub>O (10 mL), *s*-BuLi (1.0 mL, 1.0 mmol, 1.0 M, 1.0 equiv), EtOCOCl (0.13 mL, 1.5 mmol, 1.5 equiv) for 2 h prior to addition of 2 mL MeOH and warming to rt, gave the crude product as an oil. Purification by silica gel chromatography eluting with hexane-EtOAc (85:15) afforded 283 mg of *R-11* as an oil in 85% yield and 96:4 er. <sup>1</sup>H NMR (300 MHz, CDCl<sub>3</sub>) δ 7.43–7.21 (5H, m, Ph), 4.27–4.03 (2H, quartet, CH<sub>2</sub>), 3.86 (1H, br, NCH), 3.44 (1H, br, NCH), 1.72–0.96 (18H, m). <sup>13</sup>C NMR (75.5 MHz, CDCl<sub>3</sub>) δ = 172.2 (C=O of ester), 156.3 (C=O), 142.1 (C), 127.8 (CH), 125.1 (CH), 126.8 (CH), 80.5 (C), 67.5 (C), 61.1 (CH<sub>2</sub>), 44.7 (CH<sub>2</sub>), 44.5 (CH<sub>2</sub>), 28.1 (3 x CH<sub>3</sub>), 23.7 (CH<sub>2</sub>), 18.8 (CH<sub>2</sub>) and 14.1 (CH<sub>3</sub>). The enantiomer ratio was evaluated by CSP-SFC, monitoring at 210 nm, by comparison with an authentic racemic sample, under the following column conditions: **Column:** Pirkle Whelk-O-1, **Flow Rate** = 1.0 mL/min, **Polarity Modifier** = 3.0% EtOH. The minor enantiomer elutes after ~10.7 min and the major elutes after ~11.9 min.

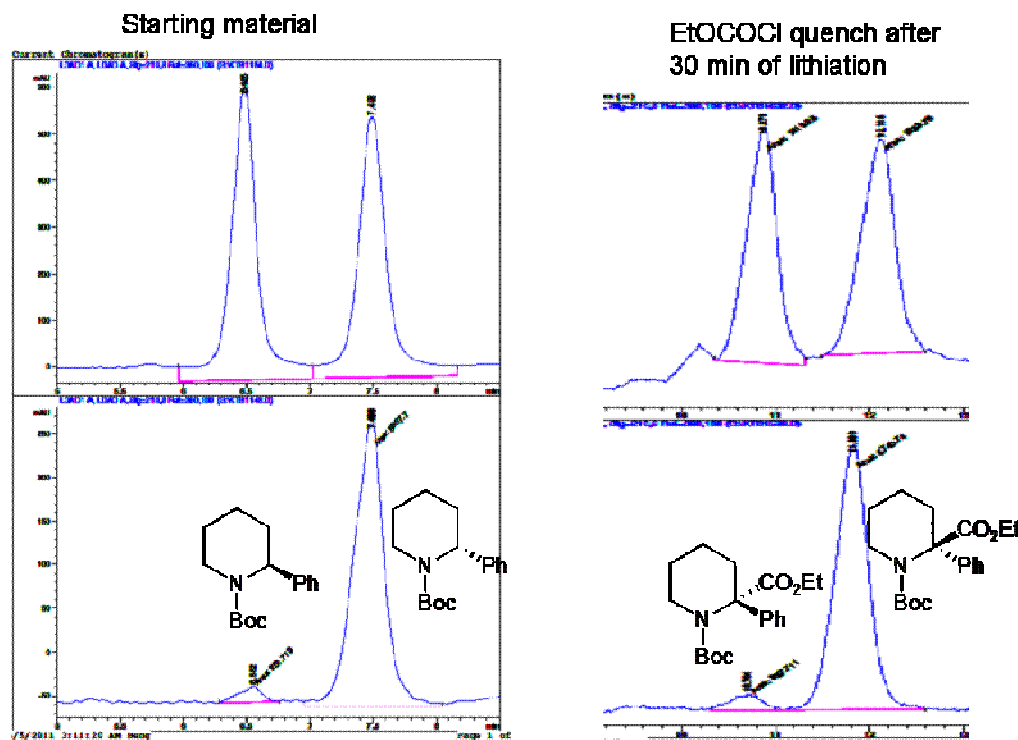

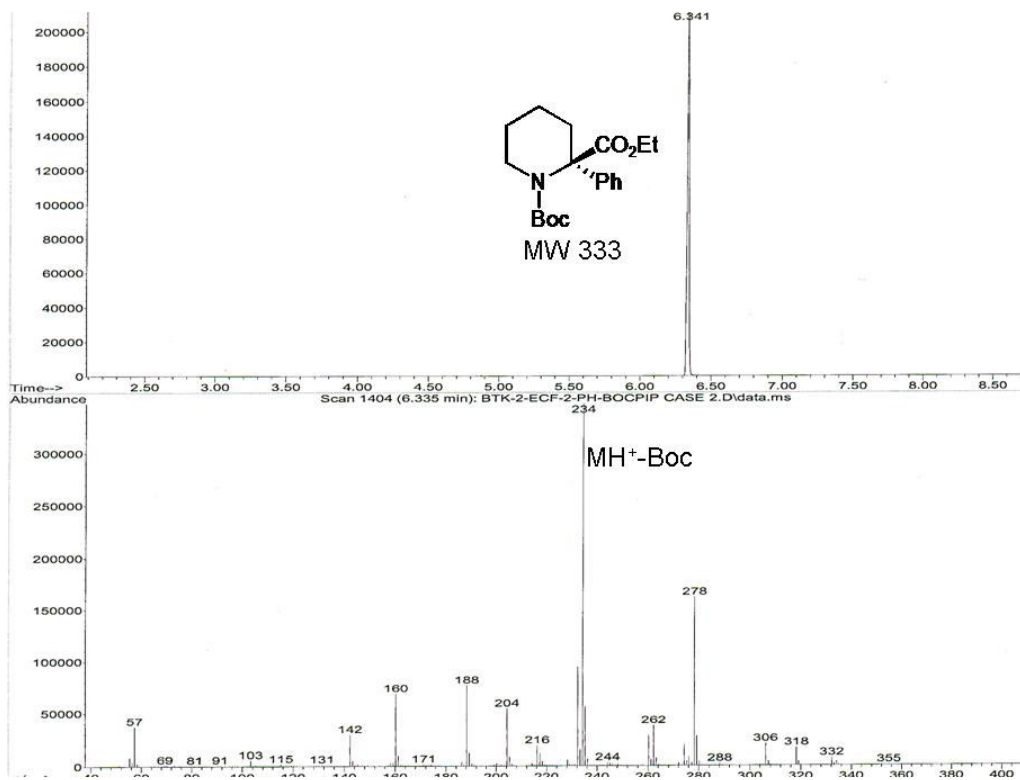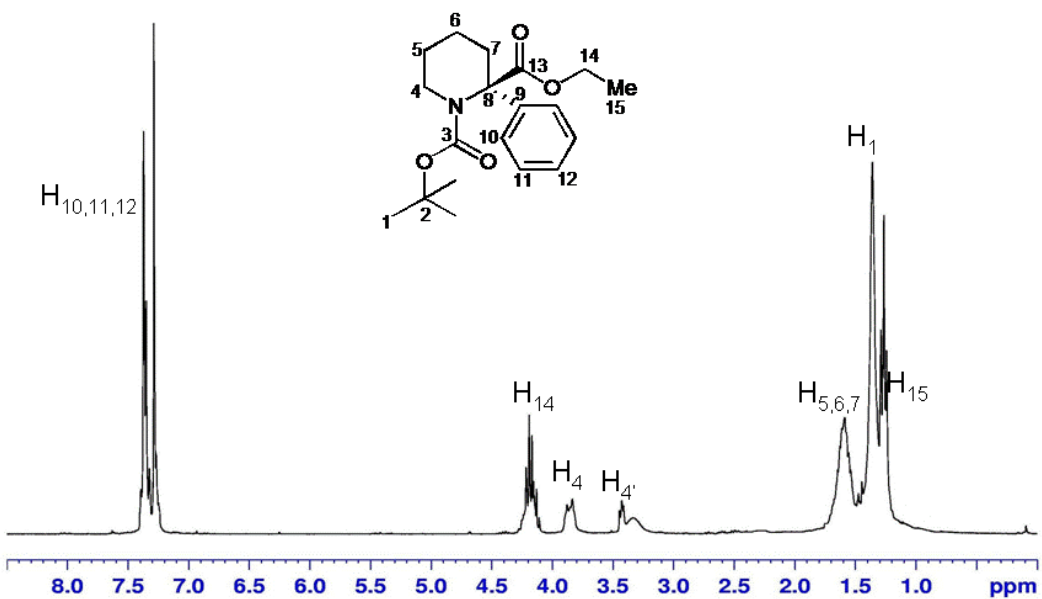

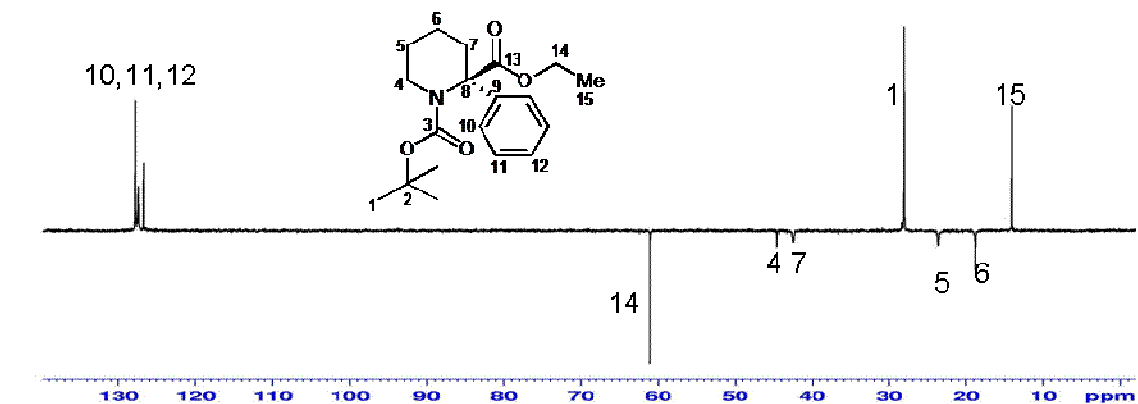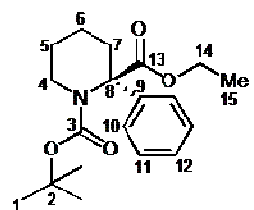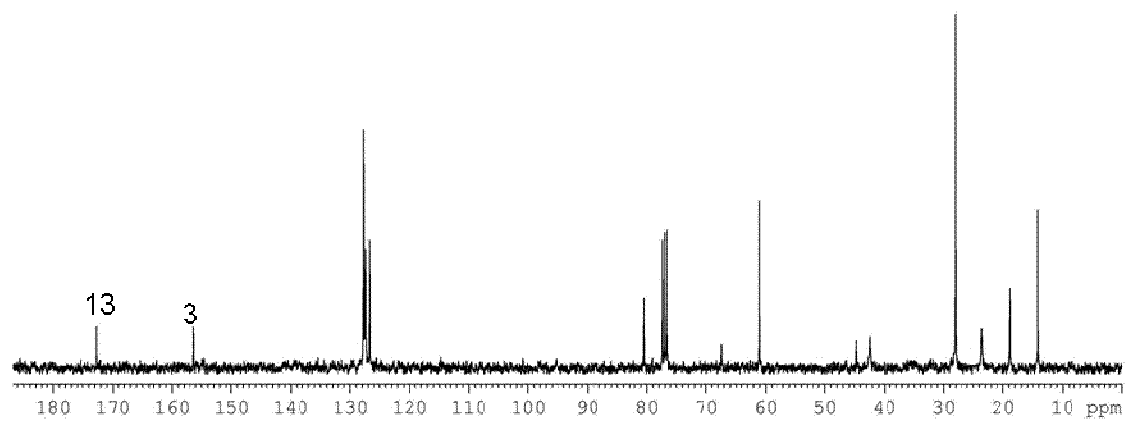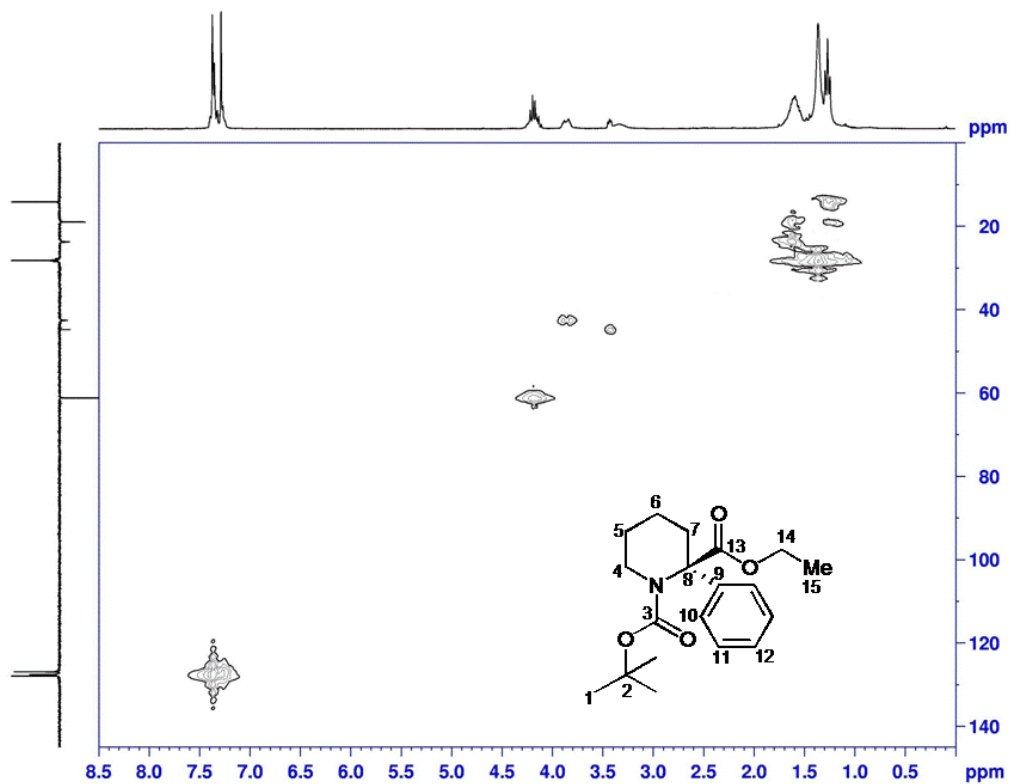



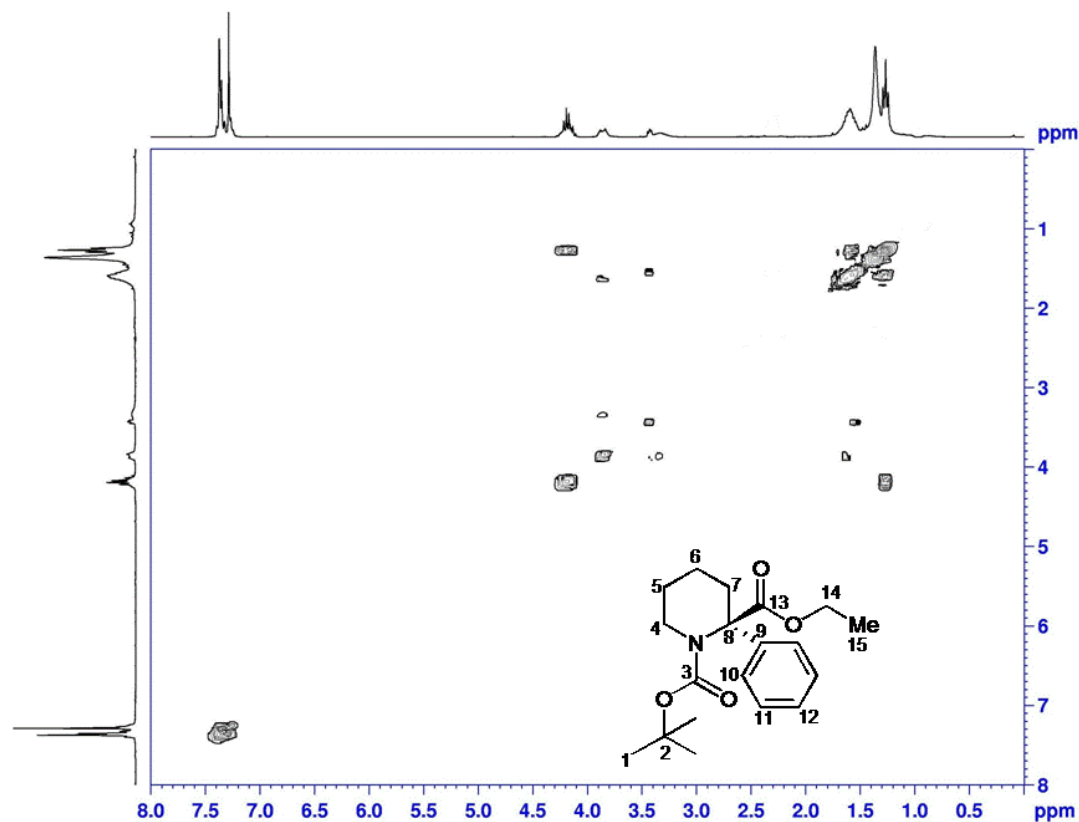

#### 4.5. With acetone- $d_6$

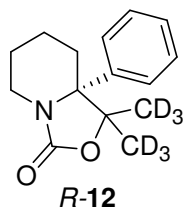

Using **General Procedure B**, *R-3* of 96:4 er (261 mg, 1.0 mmol), TMEDA (0.6 mL, 4.0 mmol, 4.0 equiv), Et<sub>2</sub>O (10 mL), *s*-BuLi (1.0 mL, 1.0 mmol, 1.0 M, 1.0 equiv), (CD<sub>3</sub>)<sub>2</sub>CO (96 mg, 1.5 mmol, 1.5 equiv) for 2 h prior to warming to rt and addition of 2 mL MeOH gave the crude product as an oil. Purification by silica gel chromatography eluting with hexane-EtOAc (60:40) afforded 229 mg of the oxazolidinone *R-12* as an amorphous solid in 90% yield and 95:5 er. <sup>1</sup>H NMR (400 MHz, CDCl<sub>3</sub>) δ = 7.55–7.15 (5H, m), 3.96 (1H, dd), 3.05 (1H, dt), 2.35 (1H, dd), 2.22–1.31 (5H and 6D, m). <sup>13</sup>C NMR (75.5 MHz, CDCl<sub>3</sub>) δ = 158.2 (C=O), 136.6 (C), 128.7 (CH), 127.7 (CH), 126.0 (CH), 77.2 (C), 69.4 (C), 40.4 (CH<sub>2</sub>), 30.3 (CH<sub>2</sub>), 28.3 (2 x CD<sub>3</sub>), 24.2 (CH<sub>2</sub>), 20.5 (CH<sub>2</sub>). The enantiomer ratio was evaluated by CSP-SFC, under the following

column conditions: **Column:** Pirkle Whelk-O-1, **Flow Rate** = 1.0 mL/min, **Polarity Modifier** = 10% EtOH. The minor enantiomer elutes after ~3.9 min and the major elutes after ~4.2 min.

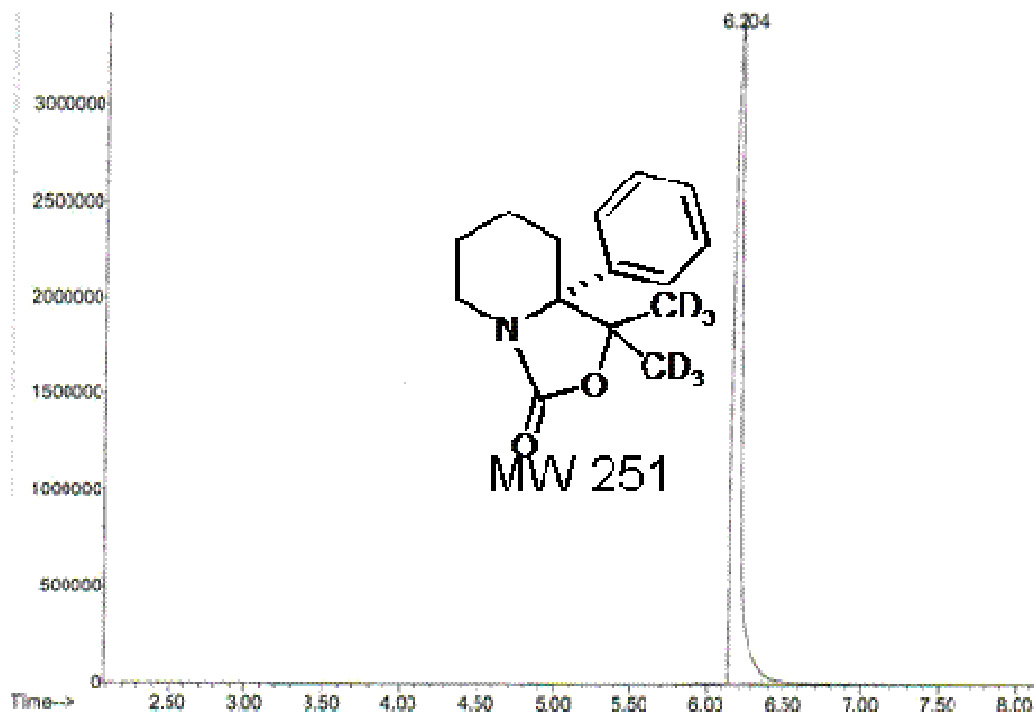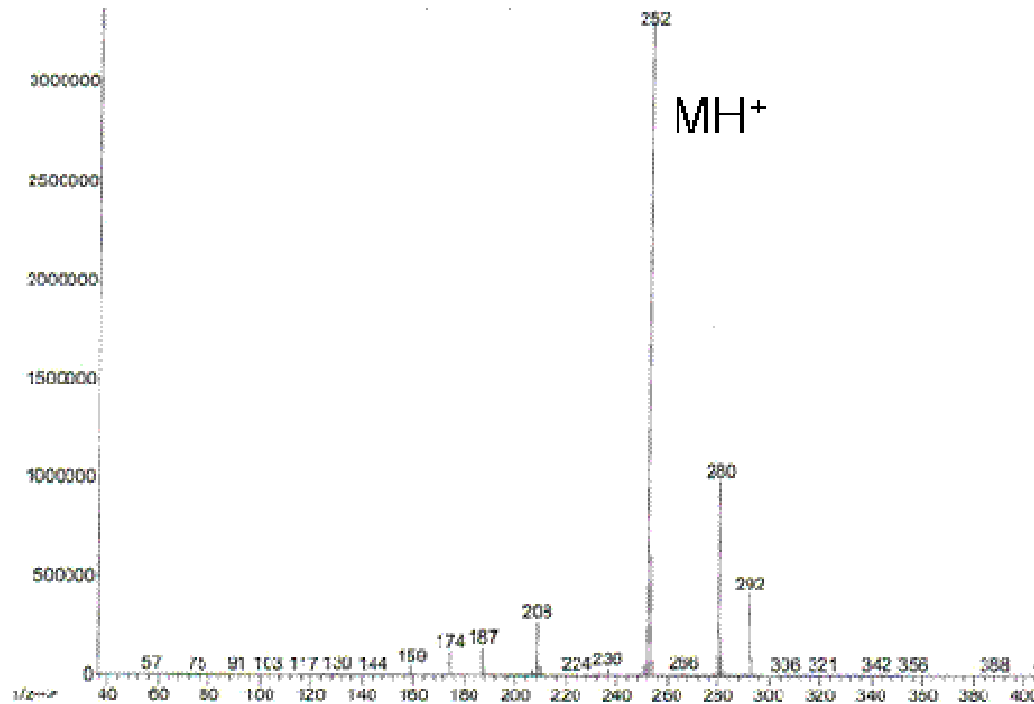

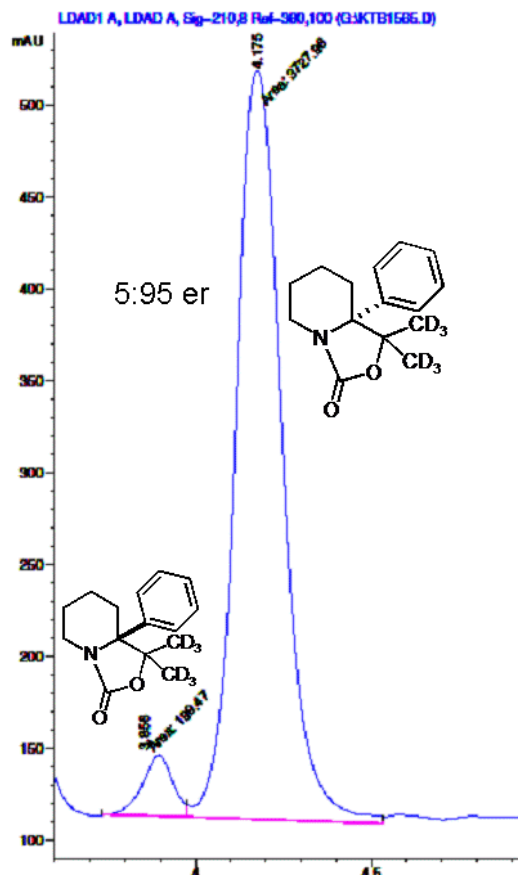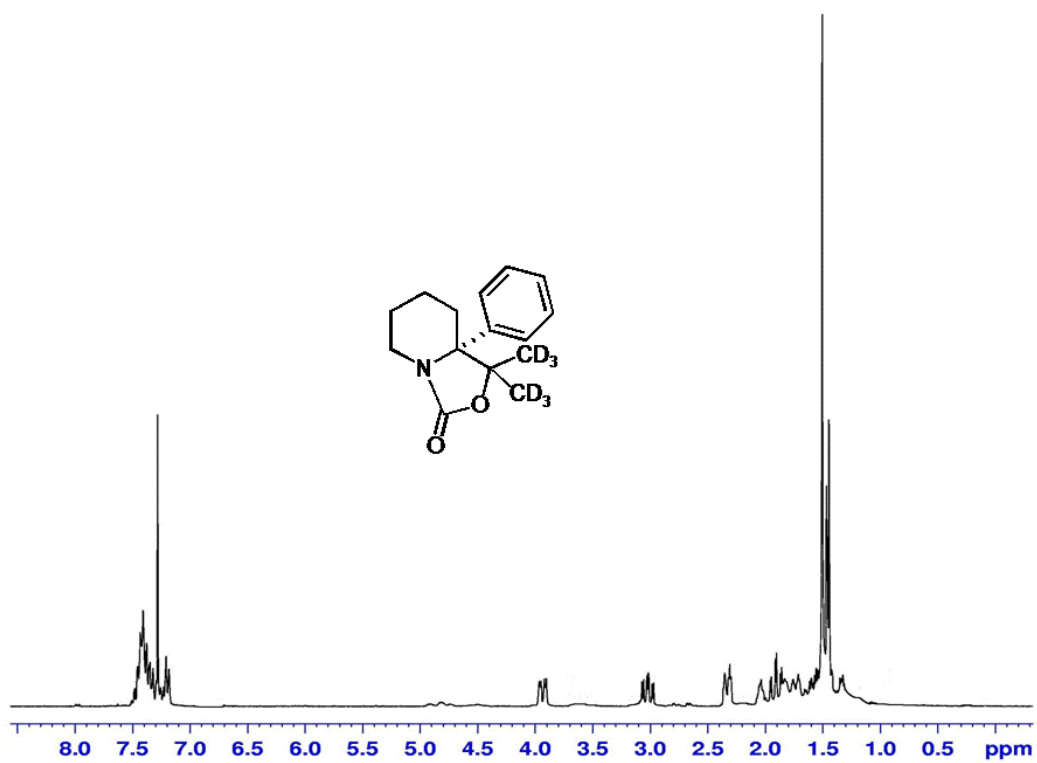

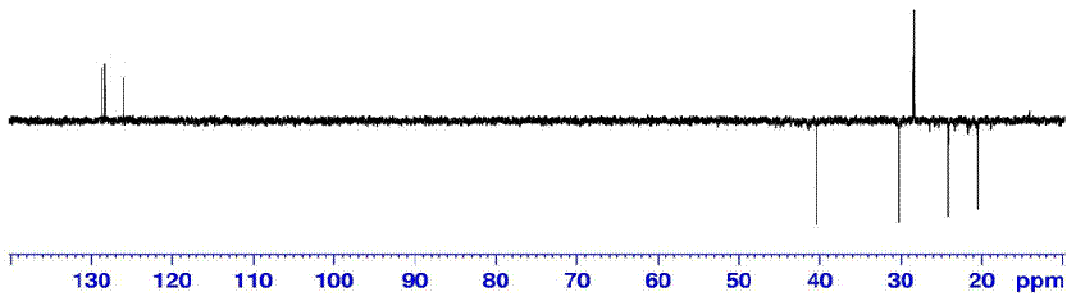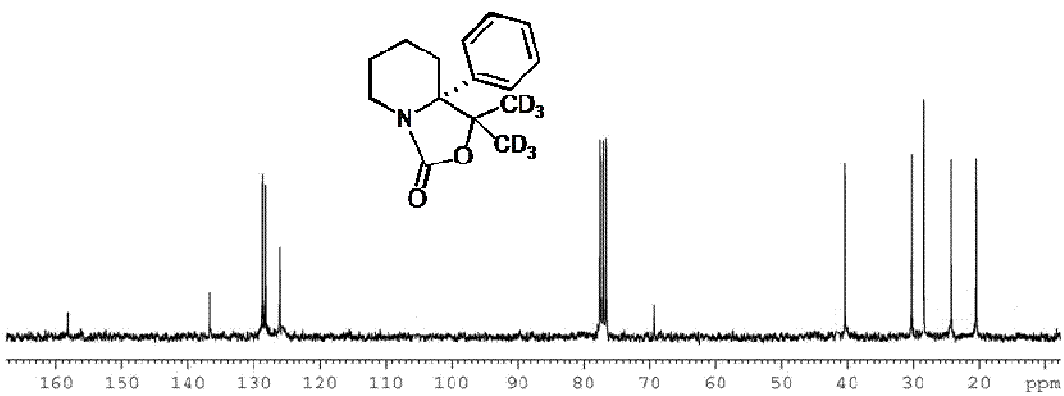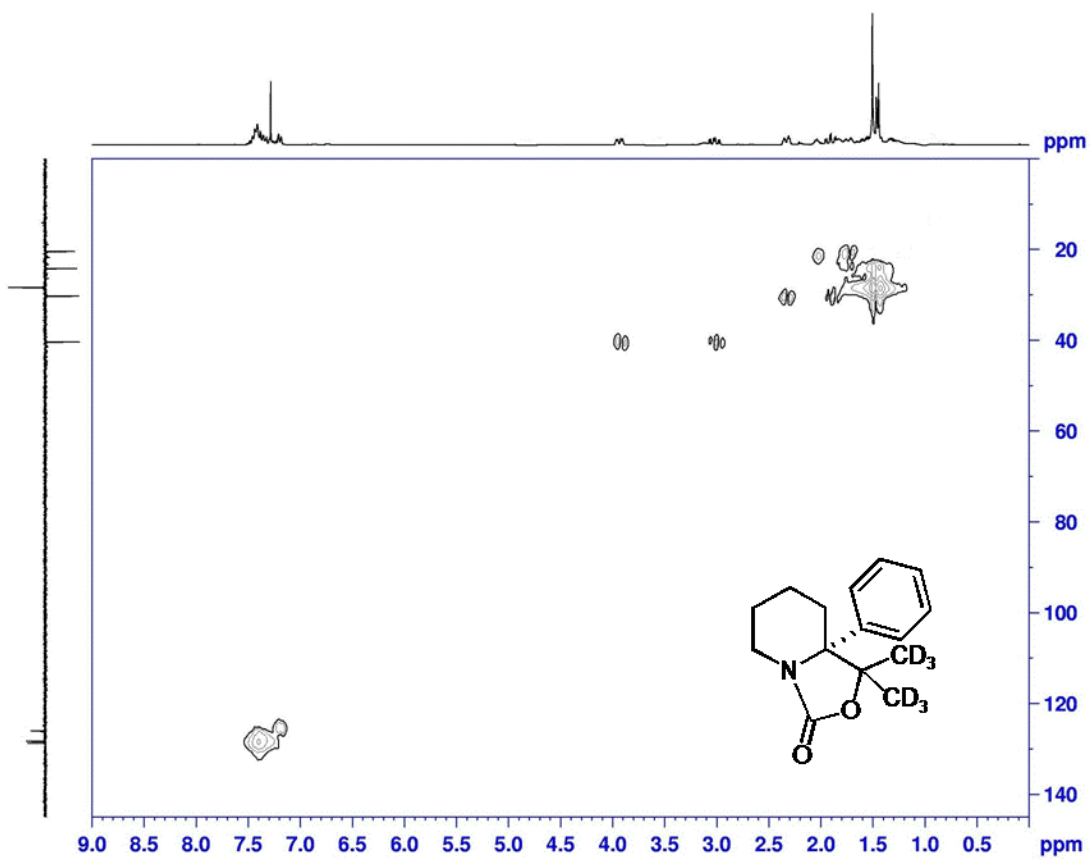

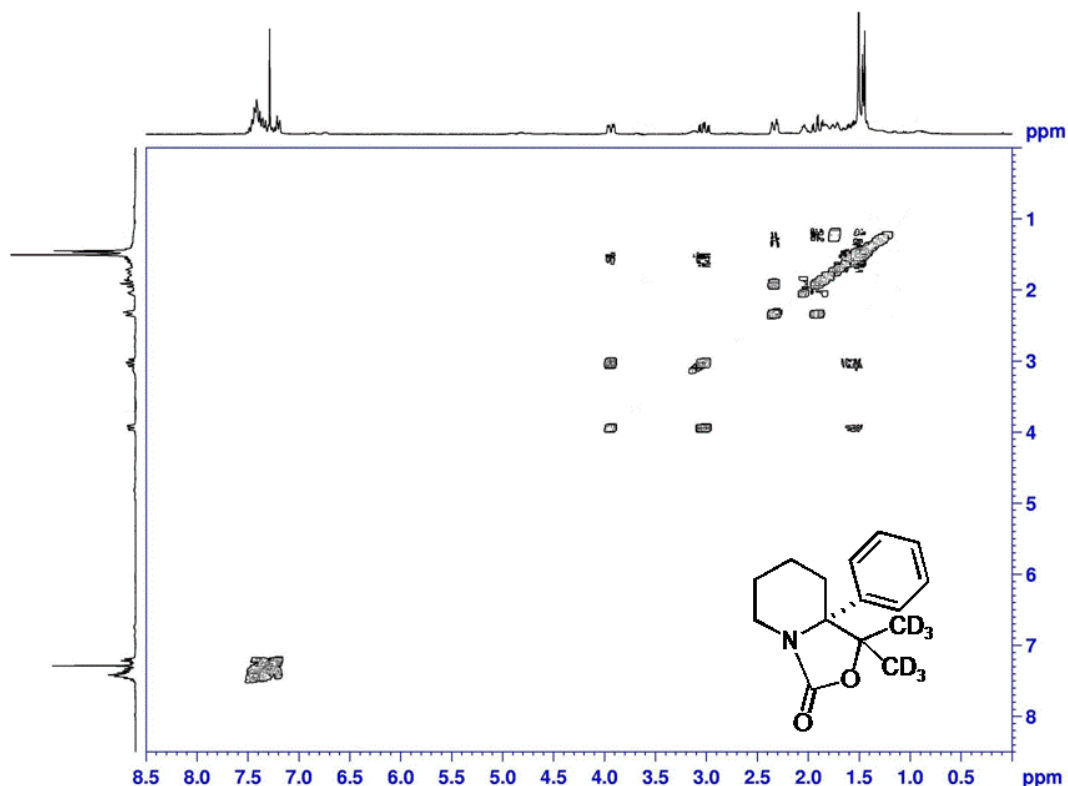

#### 4.6. With allyl bromide

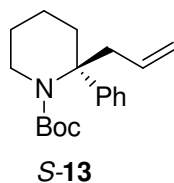

Using **General Procedure C**, *R*-**3** of 96:4 er (261 mg, 1.0 mmol), TMEDA (0.6 mL, 4.0 mmol, 4.0 equiv), Et<sub>2</sub>O (10 mL), *s*-BuLi (1.0 mL, 1.0 mmol, 1.0 M, 1.0 equiv), ZnCl<sub>2</sub> (0.6 mL, 1.0 M solution in Et<sub>2</sub>O, 0.6 equiv), CuCN·2LiCl [prepared from CuCN (107 mg, 1.2 mmol, 1.2 equiv) and LiCl (107 mg, 2.5 mmol, 2.5 equiv)], allyl bromide (0.13 mL, 1.5 mmol, 1.5 equiv) for 10 h prior to addition of 2 mL MeOH and warming to rt, gave the crude product as an oil. Purification by silica gel chromatography eluting with hexane-EtOAc (95:5) afforded 198 mg of *S*-**13** as an oil in 66% yield and 92:8 er. All other spectroscopic data as reported<sup>7</sup> for *rac*-**13**. The enantiomer ratio was evaluated by CSP-SFC, under the following column conditions: **Column**: Pirkle Whelk-O-1, **Flow Rate** = 1.0 mL/min, **Polarity Modifier** = 3% EtOH. The minor enantiomer elutes after ~10.1 min and the major elutes after ~13.1 min.

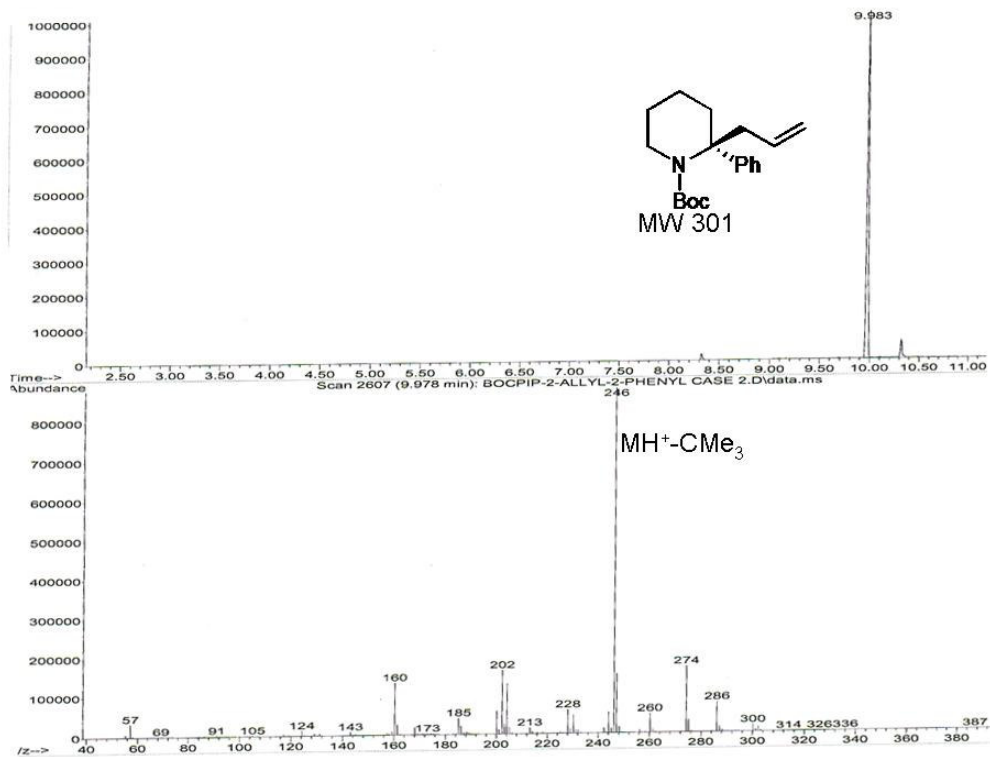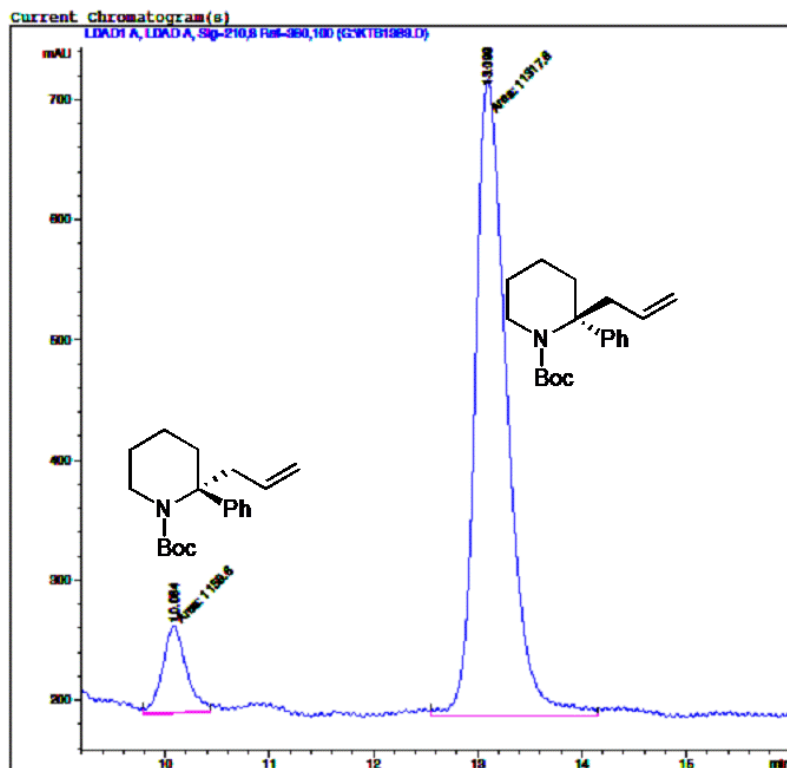

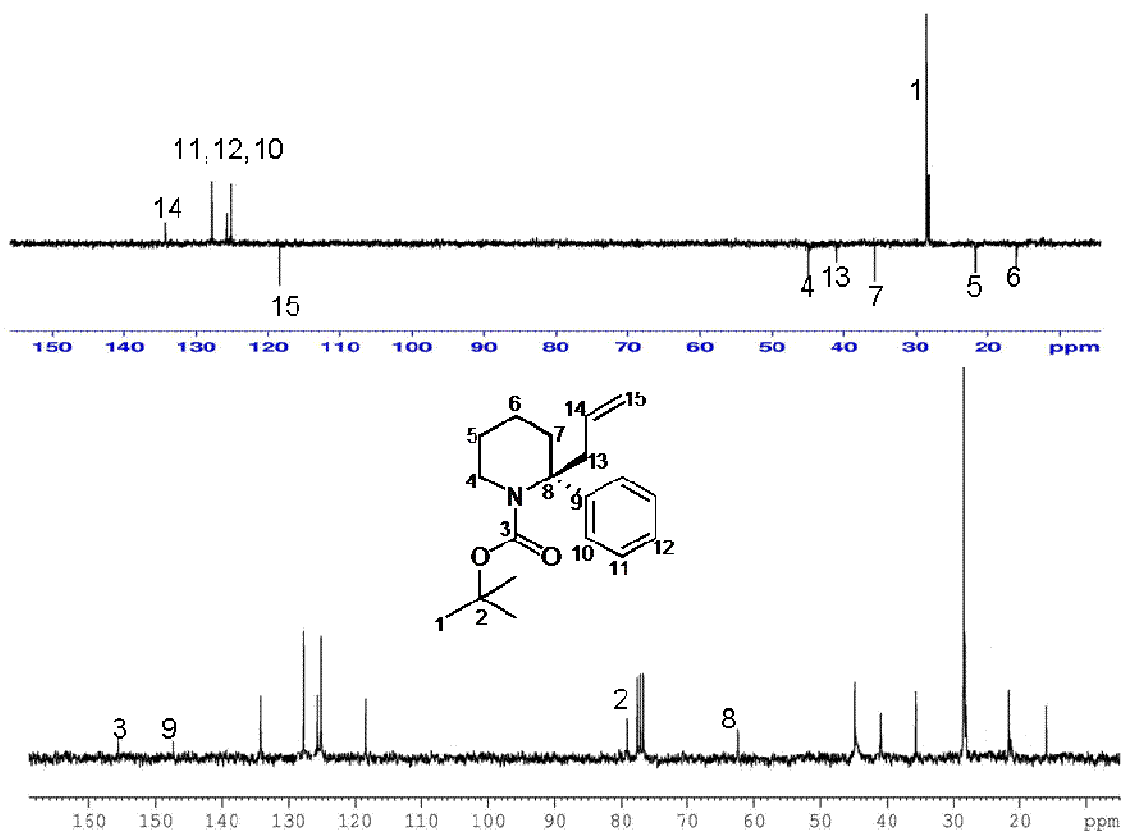

#### 4.7. With benzyl bromide

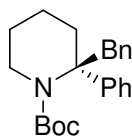

**S-14**

Using **General Procedure C**, *R-3* of 96:4 er (261 mg, 1.0 mmol), TMEDA (0.6 mL, 4.0 mmol, 4.0 equiv), Et<sub>2</sub>O (10 mL), *s*-BuLi (1.0 mL, 1.0 mmol, 1.0 M, 1.0 equiv), ZnCl<sub>2</sub> (0.6 mL, 1.0 M solution in Et<sub>2</sub>O, 0.6 equiv), CuCN·2LiCl [prepared from CuCN (107 mg, 1.2 mmol, 1.2 equiv) and LiCl (107 mg, 2.5 mmol, 2.5 equiv)], benzyl bromide (150 mg, 1.5 mmol, 1.5 equiv) for 10 h prior to addition of 2 mL MeOH and warming to rt, gave the crude product as an oil. Purification by silica gel chromatography eluting with hexane-EtOAc (95:5) afforded 259 mg of *S-14* as an oil in 71% yield and 94:6 er. <sup>1</sup>H NMR (300 MHz, CDCl<sub>3</sub>) δ = 7.50–7.18 (10H, m), 4.21 – 3.48 (3H, m), 3.25 (1H, dd), 2.45–1.40 (6H, m), 1.35 (9H, s). <sup>13</sup>C NMR (75.5 MHz, CDCl<sub>3</sub>) δ = 155.5 (C=O), 138.6 (C), 137.8 (C), 128.5 (CH), 128.0 (CH), 127.8 (CH), 126.4 (CH), 125.8 (CH), 125.3 (CH), 79.7 (C), 63.3 (C), 43.8 (CH<sub>2</sub>), 39.8 (CH<sub>2</sub>), 40.0 (CH<sub>2</sub>), 28.3 (3 x CH<sub>3</sub>), 20.9 (CH<sub>2</sub>), 14.8 (CH<sub>2</sub>). The enantiomer ratio was evaluated by CSP-SFC, monitoring at

210 nm, by comparison a racemic sample, under the following column conditions: **Column:** Pirkle Whelk-O-1, **Flow Rate** = 1.0 mL/min, **Polarity Modifier** = 5.0% EtOH. The minor enantiomer elutes after ~6 min and the major elutes after ~7 min.

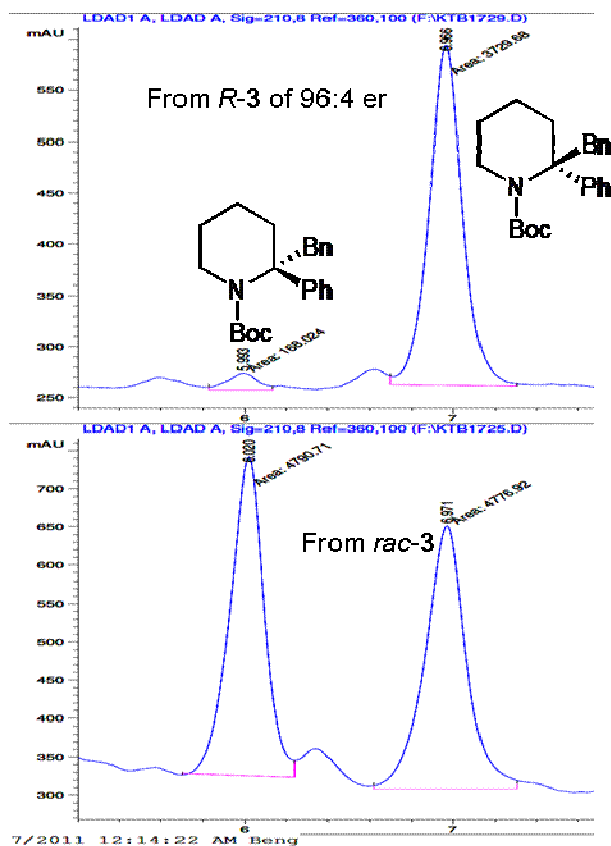



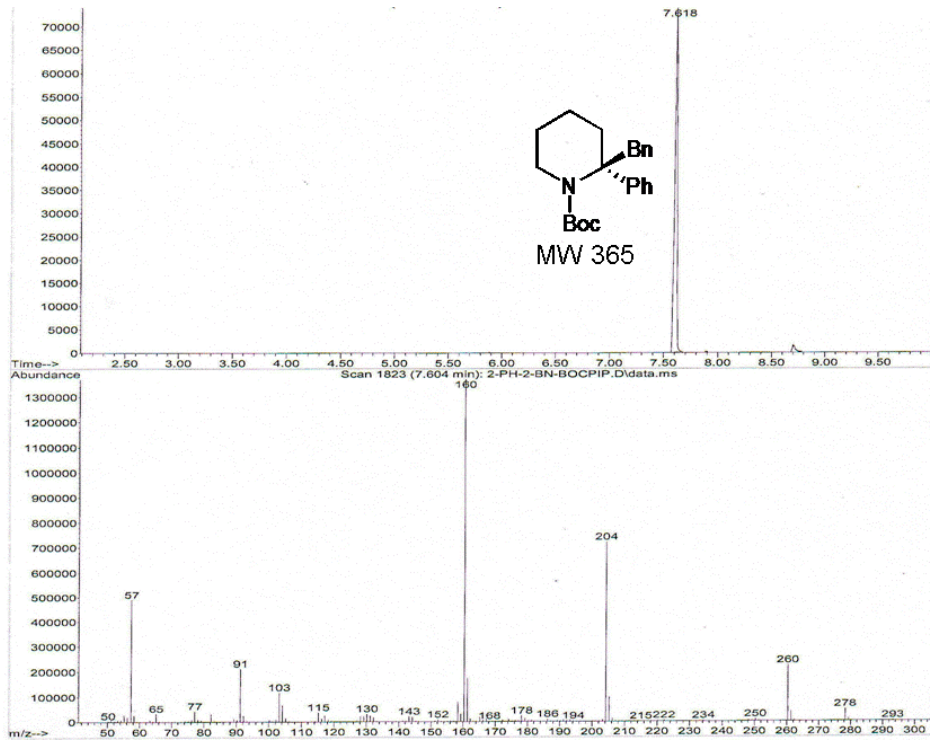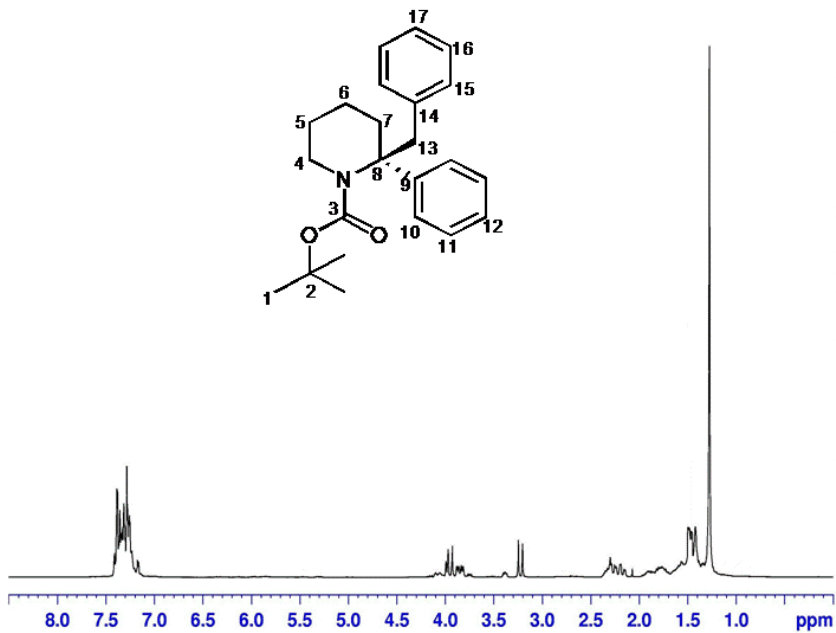

Current Data Parameters  
 NAME btk-BocPip-2-Ph-2-Bn  
 EXPNO 9  
 PROCNO 1

F2 - Acquisition Parameters  
 Date\_ 20110623  
 Time 2.26  
 INSTRUM spect  
 PROBHD 5 mm PABBO BB-  
 PULPROG zg  
 TD 65536  
 SOLVENT CDCl3  
 NS 16  
 DS 0  
 SWH 6172.839 Hz  
 FIDRES 0.094190 Hz  
 AQ 5.3084660 sec  
 RG 50.8  
 DW 81.000 usec  
 DE 6.00 usec  
 TE 295.6 K  
 DI 1.0000000 sec  
 MCREST 0.0000000 sec  
 MCWRK 0.0150000 sec

\*\*\*\*\* CHANNEL f1 \*\*\*\*\*  
 NUC1 1H  
 P1 12.20 usec  
 PL1 -1.00 dB  
 SF01 300.1318534 MHz

F2 - Processing parameters  
 SI 32768  
 SF 300.1300000 MHz  
 WDW EM  
 SSB 0  
 LB 0.30 Hz  
 GB 0  
 PC 1.40

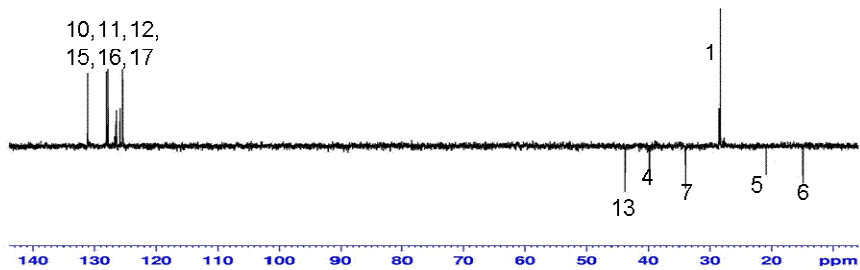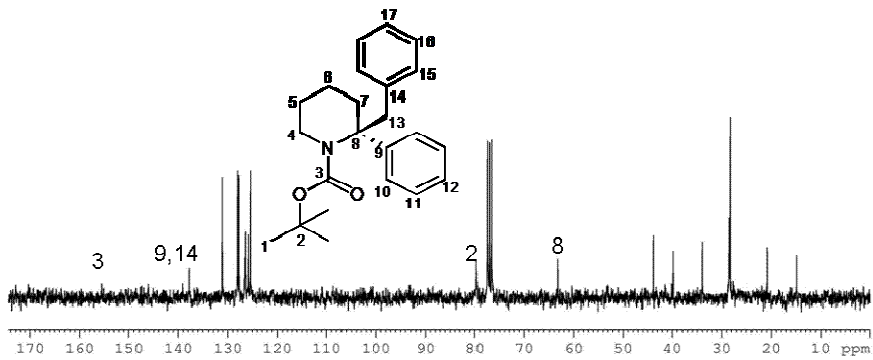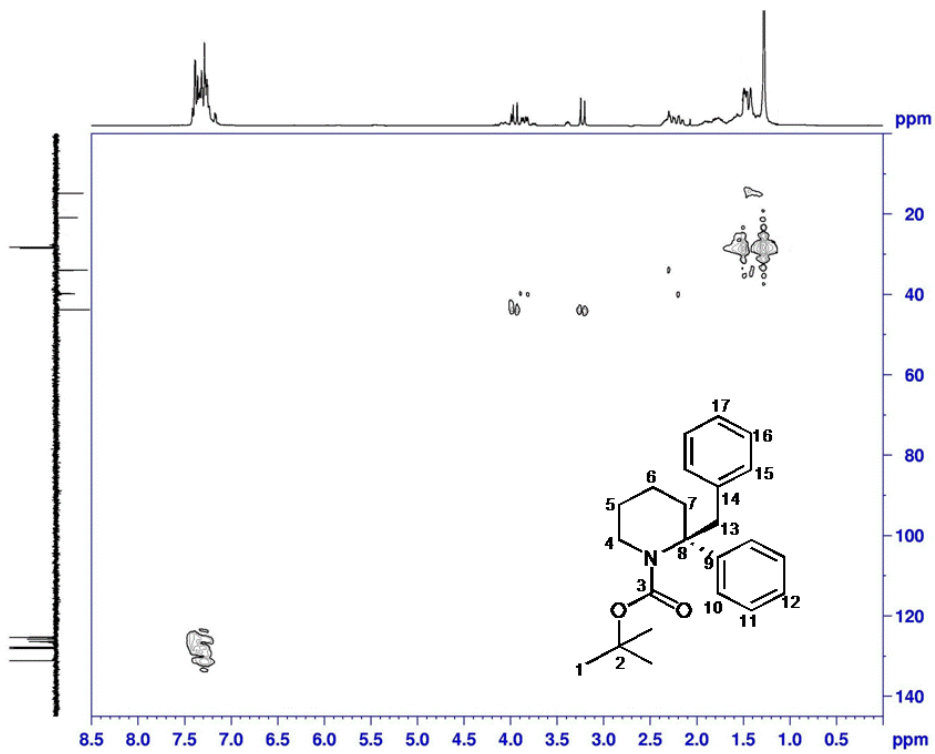

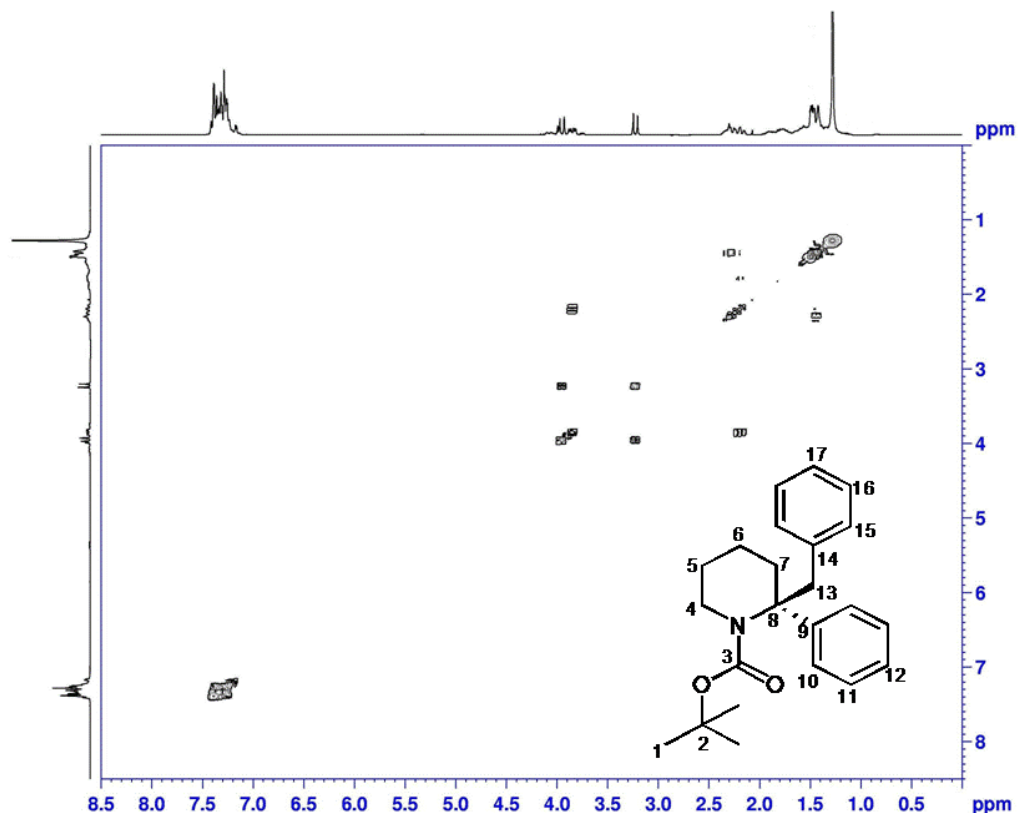

## 5. Lithiation-substitution of other (*R*)-*N*-Boc-2-arylpiperidines with several electrophiles

### 5.1. (*R*)-*N*-Boc-2-(3,4-dimethoxy)phenylpiperidine:

#### 5.1.1. With MeOD

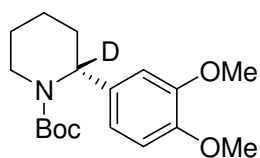

***R*-4-*d*<sub>1</sub>**

Using **General Procedure D**, *R*-4 of 97:3 er and 0.1 mL MeOD showed complete deuteration after 30 min. There is a noticeable shift of the protonated base peak from *m/z* 222 for **4** to *m/z* 223 for **4-*d*<sub>1</sub>**.

#### 5.1.3. With acetone-*d*<sub>6</sub>

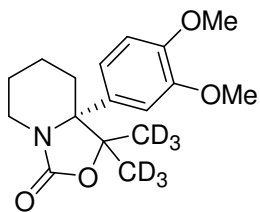

***R*-15**

Using **General Procedure B**, *R-4* of 97:3 er (321 mg, 1.0 mmol), TMEDA (0.6 mL, 4.0 mmol, 4.0 equiv), Et<sub>2</sub>O (10 mL), *s*-BuLi (0.8 mL, 1.0 mmol, 1.2 M, 1.0 equiv), (CD<sub>3</sub>)<sub>2</sub>CO (96 mg, 1.5 mmol, 1.5 equiv) for 2 h prior to warming to rt and addition of 2 mL MeOH gave the crude product as an oil. Purification by silica gel chromatography eluting with hexane-EtOAc (30:70) afforded 289 mg of the oxazolidinone *R-15* as an amorphous solid in 93% yield and 97:3 er. <sup>1</sup>H NMR (300 MHz, CDCl<sub>3</sub>) δ = 6.95–6.65 (3H, m), 4.10–3.68 (7H, m), 3.31–2.95 (1H, m), 2.25 (1H, m), 2.22–1.31 (5H and 6D, m) <sup>13</sup>C NMR (75.5 MHz, CDCl<sub>3</sub>) δ = 158.2 and 158.1 (C=O), 156.0 (C), 149.3, 149.1, and 148.4 (C), 118.0 (CH), 111.5 and 111.4 (CH), 109.0 (CH), 78.9 (C), 69.1 (C), 56.9, 56.1, 56.0, 55.9 (OMe), 40.6 and 40.3 (CH<sub>2</sub>), 30.2, 30.0 (CH<sub>2</sub>), 28.4 (2 x CD<sub>3</sub>), 24.1 (CH<sub>2</sub>), 20.4 (CH<sub>2</sub>). The enantiomer ratio was evaluated by CSP-SFC, under the following column conditions: **Column:** Pirkle Whelk-O-1, **Flow Rate** = 2.0 mL/min, **Polarity Modifier** = 10% EtOH. The minor enantiomer elutes after ~14. min and the major elutes after ~15.4 min.

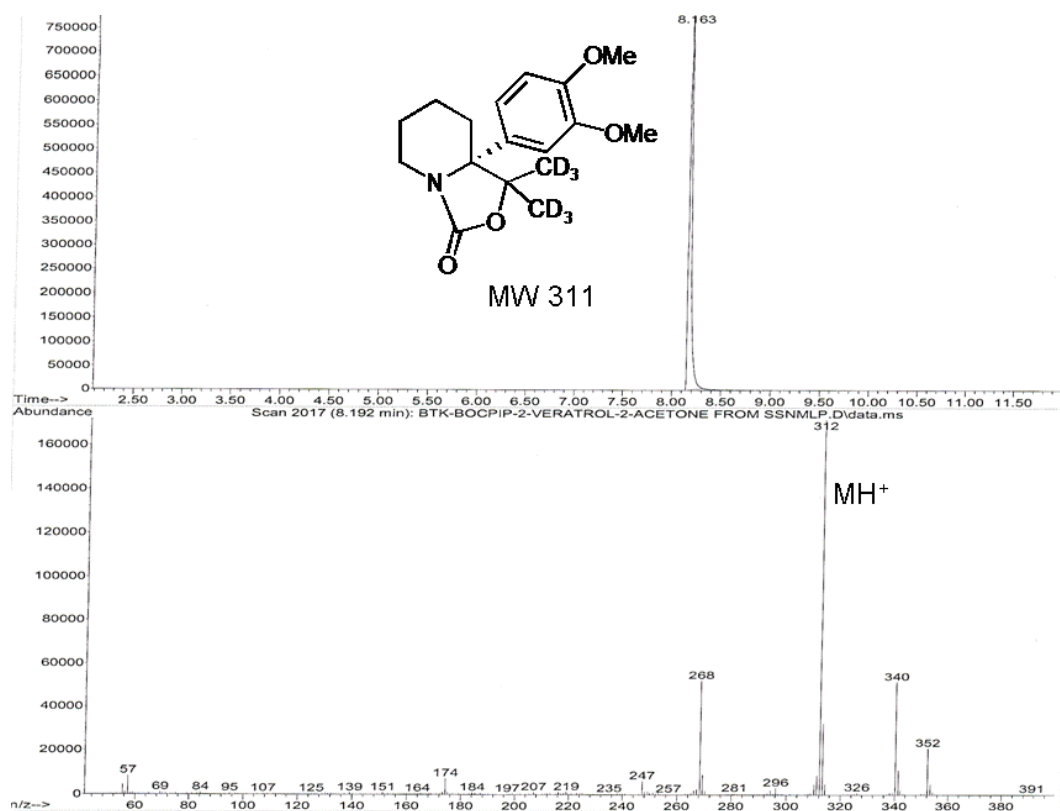

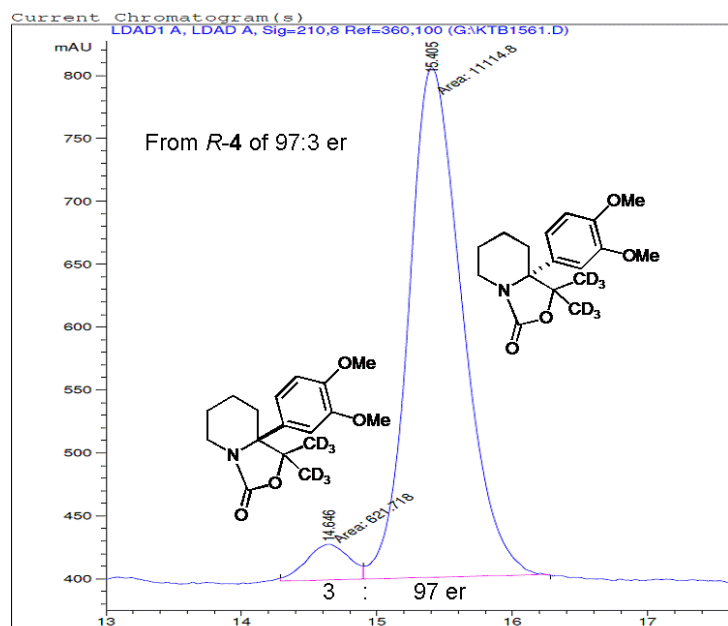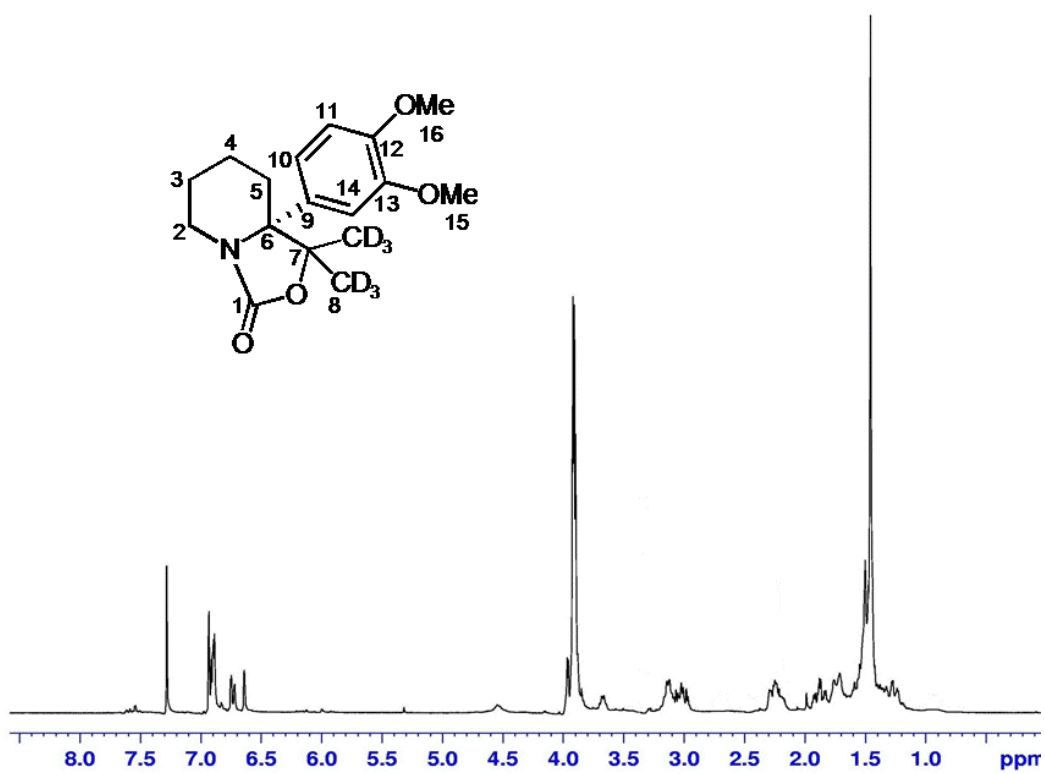

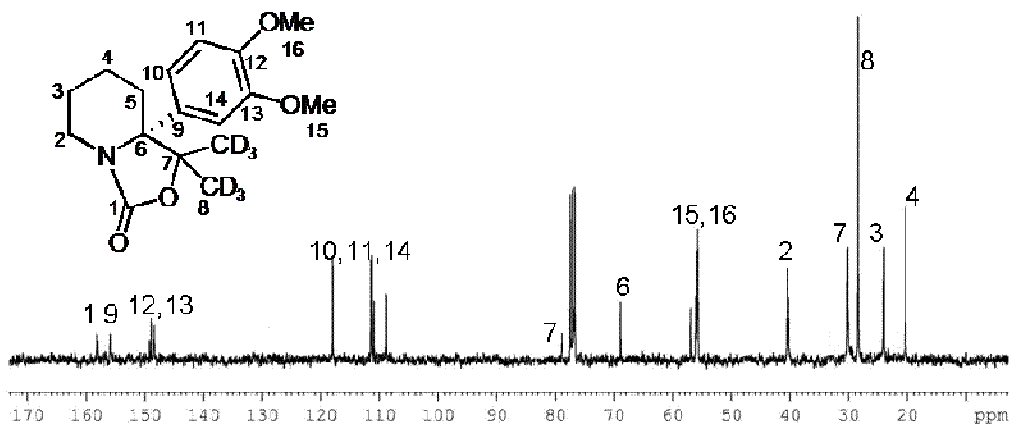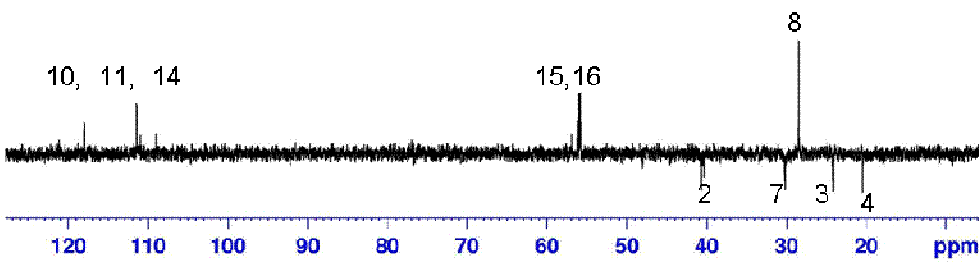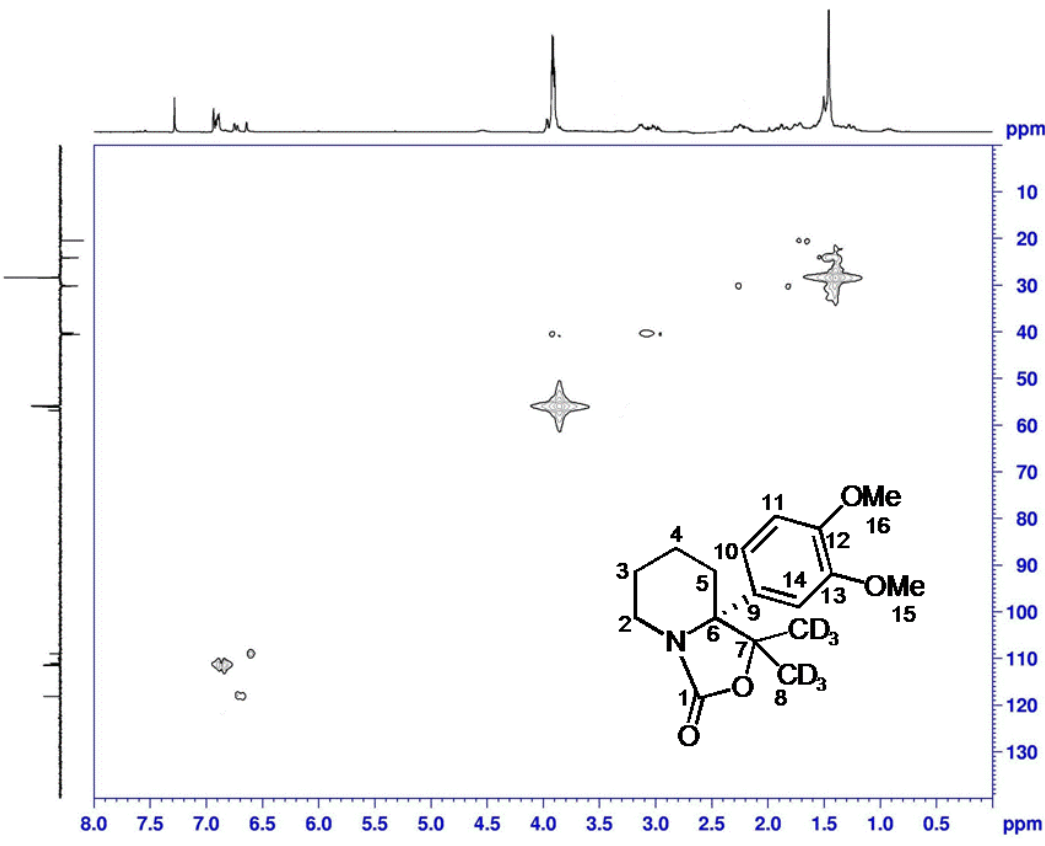

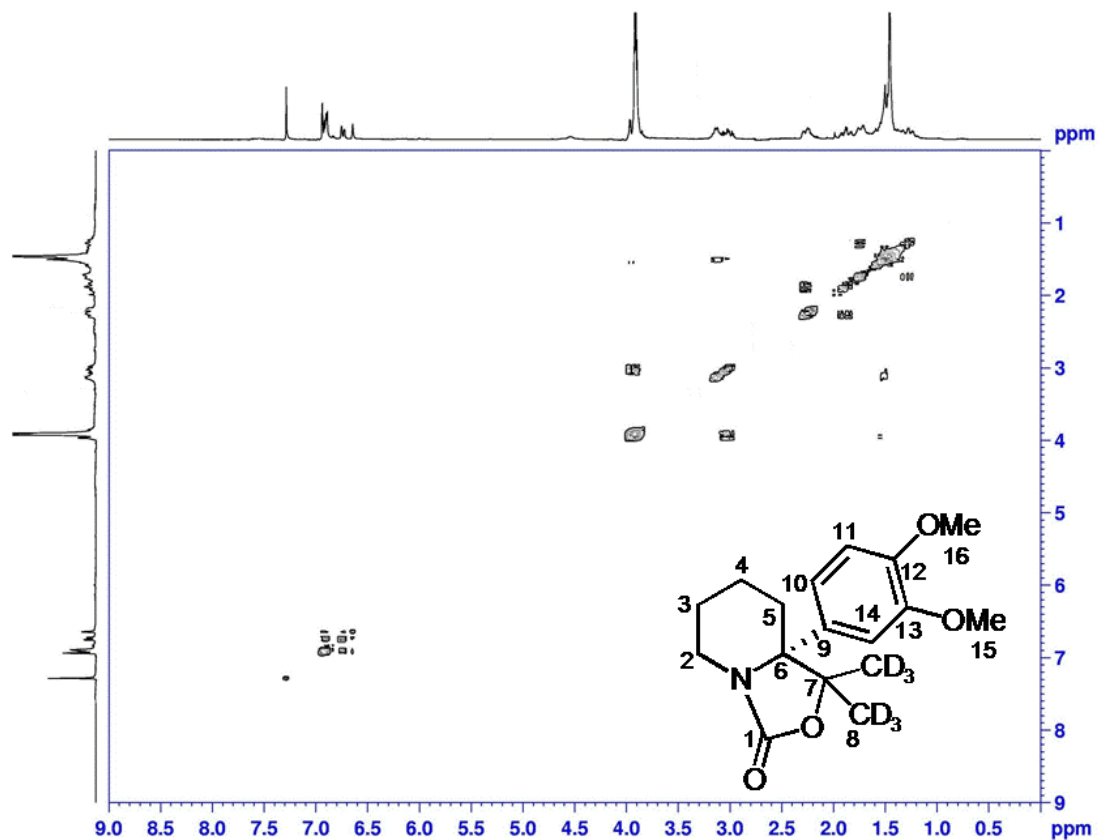

## 5.2. (*R*)-*N*-Boc-2-(4-*tert*-butyl)phenylpiperidine:

### 5.2.1. With MeOD

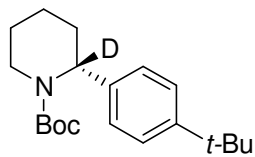

*R*-5- $d_1$

Using **General Procedure D**, *R*-5 of 90:10 er and 0.1 mL MeOD showed complete deuteration after 30 min.

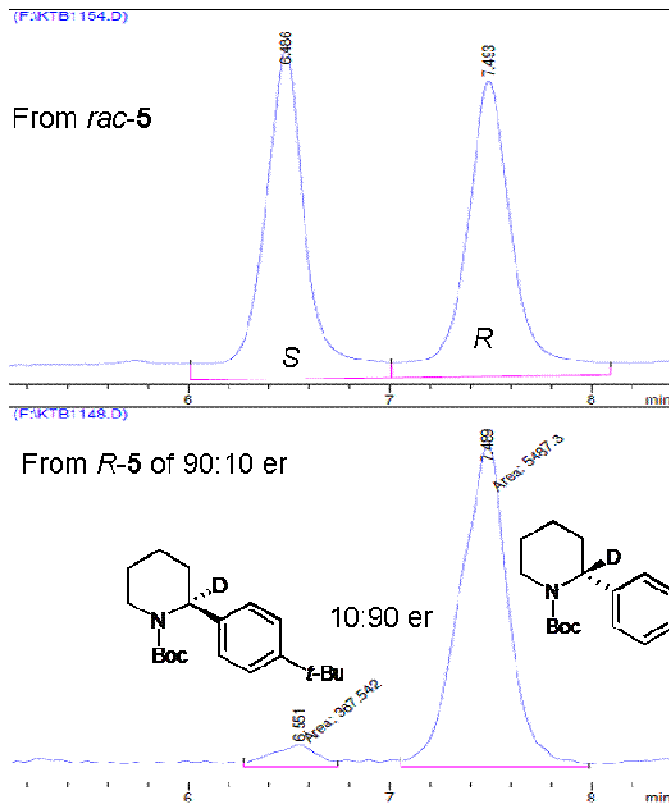

### 5.3. (*R*)-*N*-Boc-2-(4-cyano)phenylpiperidine:

#### 5.3.1. With MeOD

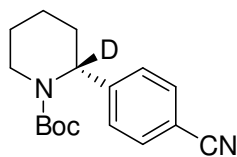

*R*-6-*d*<sub>1</sub>

Using **General Procedure D**, *R*-6 of 91:9 er and 0.1 mL MeOD showed complete deuteration after 30 min and **6-*d*<sub>1</sub>** was obtained with no loss of er. There is a noticeable shift of the protonated base peak from *m/z* 287 for **6** to *m/z* 288 for **6-*d*<sub>1</sub>**.

#### 5.3.2. With Me<sub>2</sub>SO<sub>4</sub>

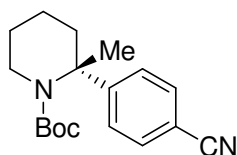

*R*-16

Using **General Procedure B**, *R*-6 of 90:10 er (286 mg, 1.0 mmol), TMEDA (0.6 mL, 4.0 mmol, 4.0 equiv), Et<sub>2</sub>O (10 mL), *s*-BuLi (1.0 mL, 1.0 mmol, 1.0 M, 1.0 equiv), Me<sub>2</sub>SO<sub>4</sub> (0.15 mL, 1.5



mmol, 1.5 equiv) for 18 h prior to addition of 2 mL MeOH, gave the crude product as an oil. Purification by silica gel chromatography eluting with hexane-EtOAc (90:10) afforded 213 mg of *R*-**16** as an oil in 71% yield and 90:10 er.  $^1\text{H}$  NMR (300 MHz,  $\text{CDCl}_3$ )  $\delta$  7.63 (d, 2H), 7.45 (d, 2H), 3.88 (m, 1H), 3.41 (m, 1H), 1.92-1.51 (m, 9H) 1.12 (s, 9H),  $^{13}\text{C}$  NMR (75.5 MHz,  $\text{CDCl}_3$ )  $\delta$  156.2 (C=O), 155.6 (C), 131.9 (CH), 125.2 (CH), 119.2 (C), 109.2 (C of nitrile), 80.0 (C), 59.8 (C), 41.4 ( $\text{CH}_2$ ), 41.2 ( $\text{CH}_2$ ), 28.1 (3 x  $\text{CH}_3$ ), 23.3 ( $\text{CH}_2$ ), 22.3 ( $\text{CH}_3$ ), 18.1 ( $\text{CH}_2$ ).

The enantiomer ratio was evaluated by CSP-SFC, monitoring at 210 nm, by comparison with an authentic racemic sample, under the following column conditions: **Column:** Pirkle Whelk-O-1, **Flow Rate** = 2.0 mL/min, **Polarity Modifier** = 3.0% EtOH. The minor enantiomer elutes after ~4.5 min and the major elutes after ~5.4 min.

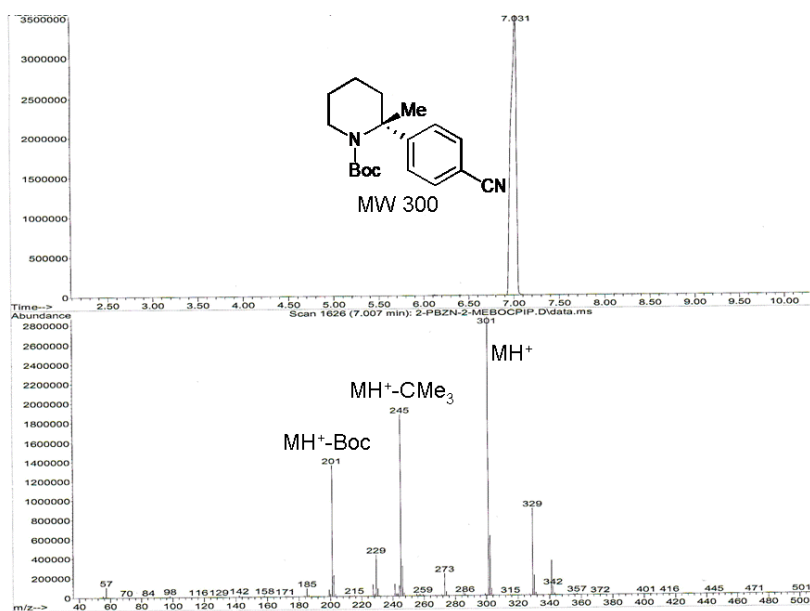

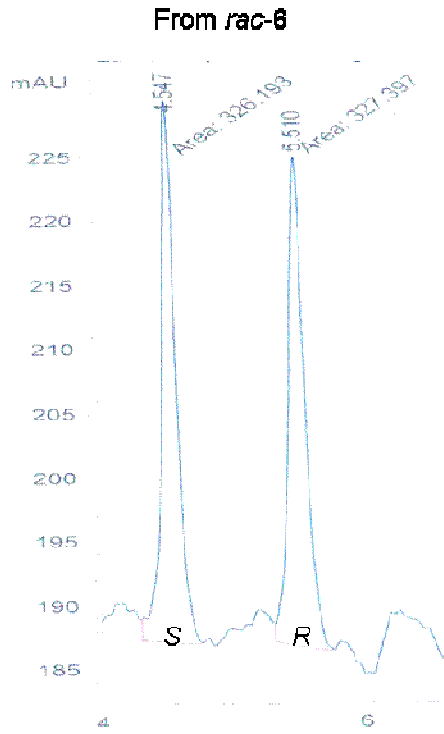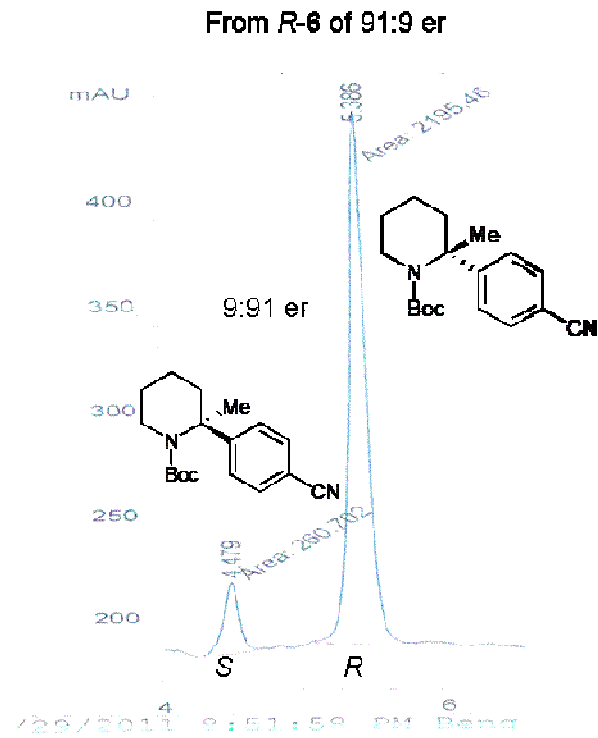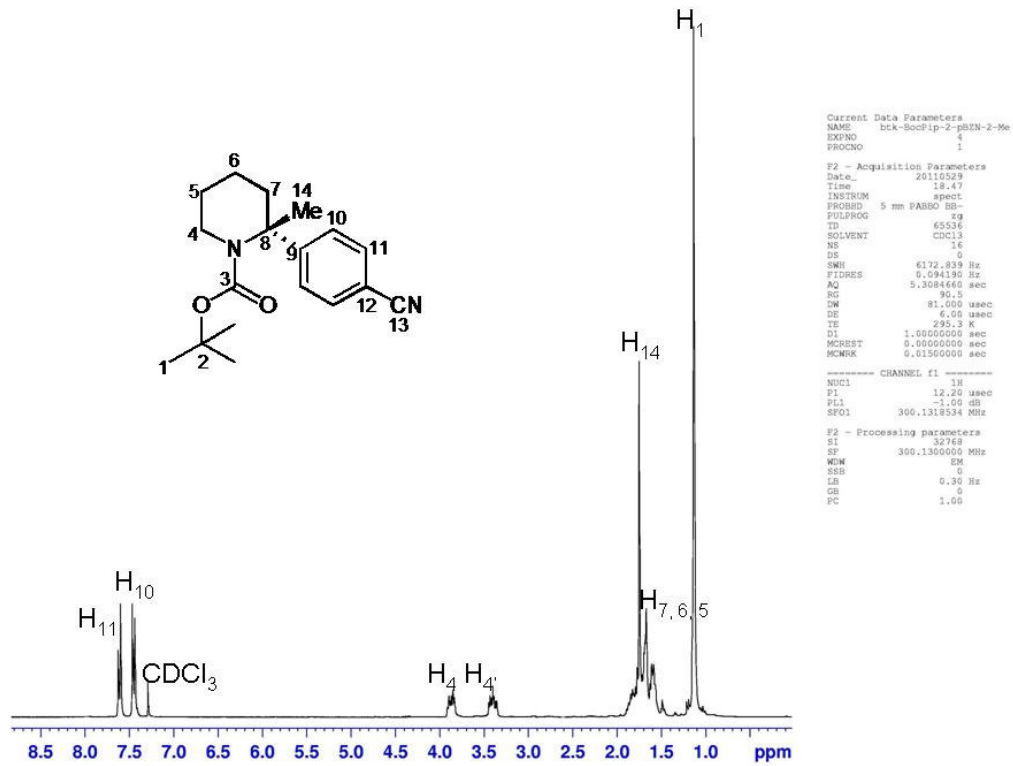

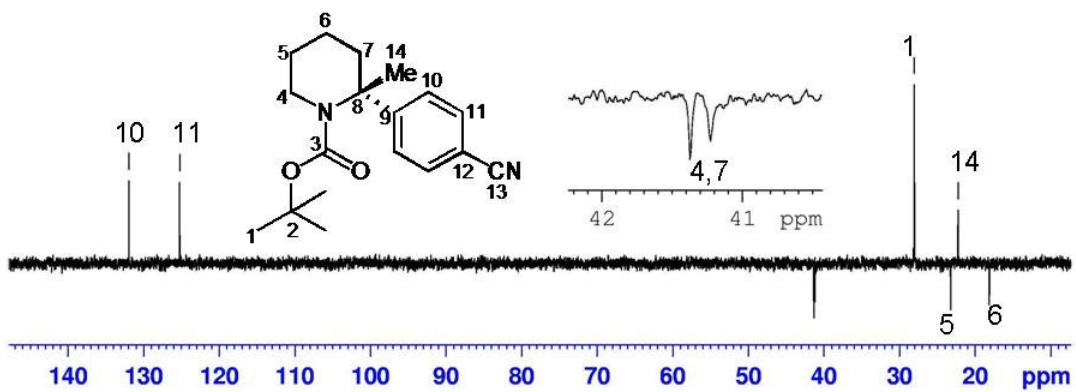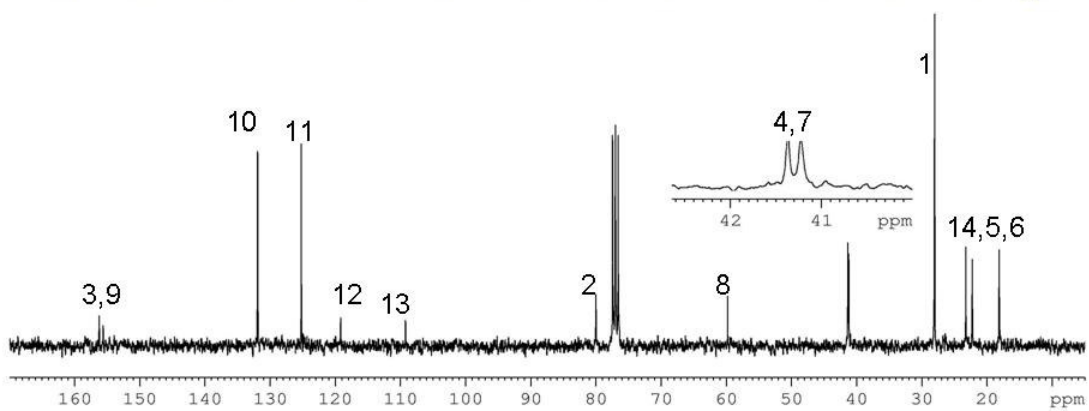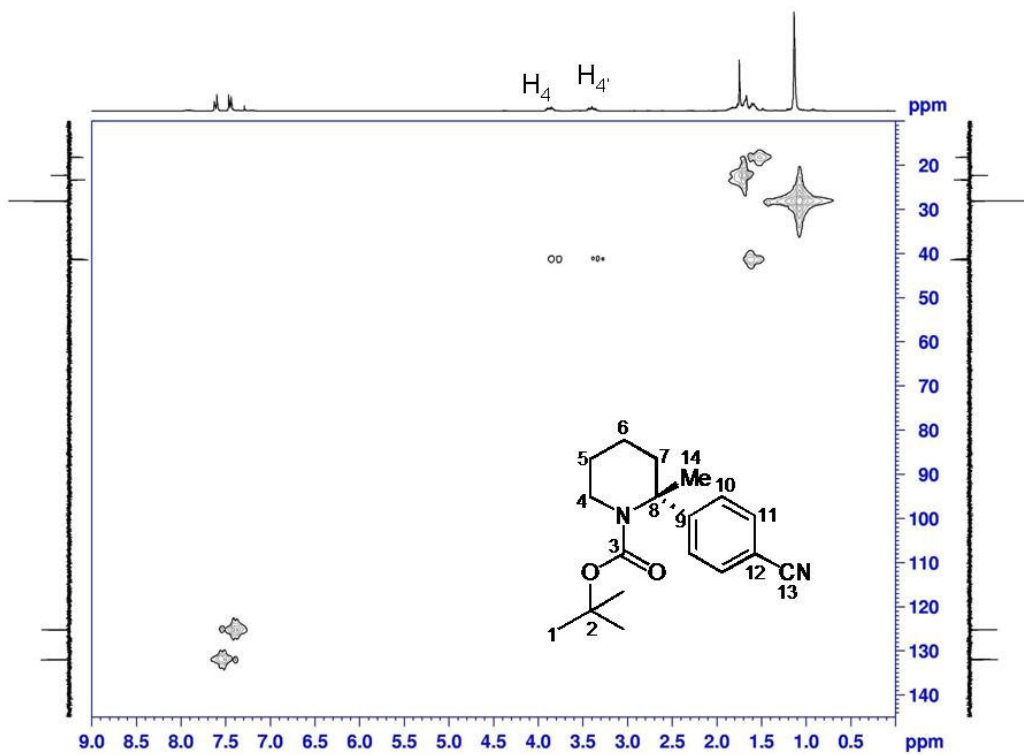

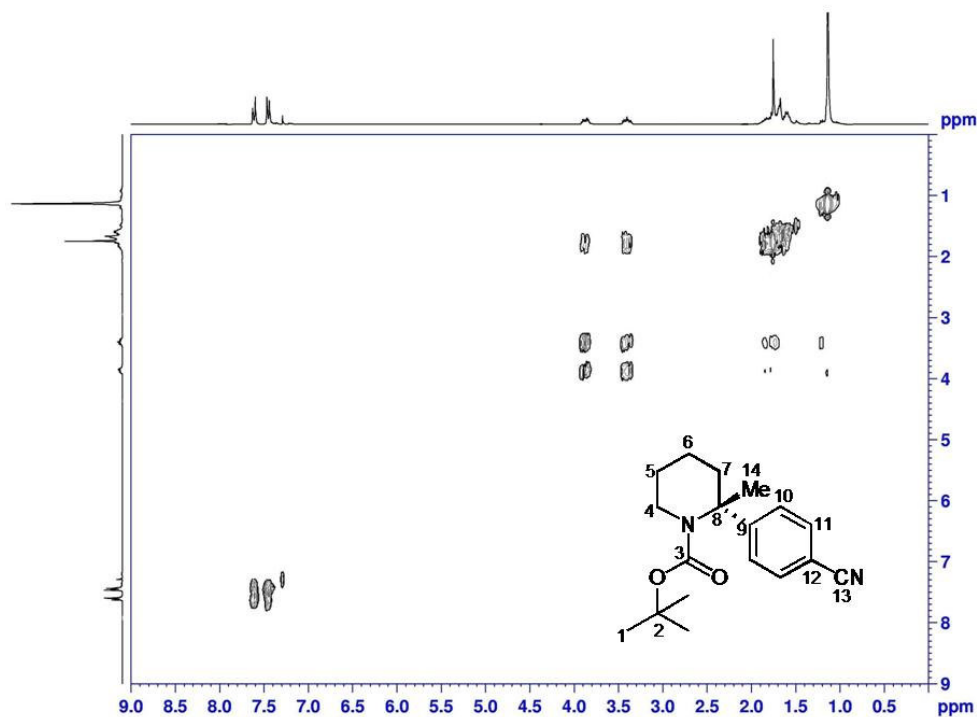

#### 5.4. (*R*)-*N*-Boc-2-(1-naphthyl)piperidine:

##### 5.4.1. With MeOD

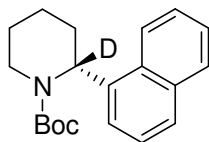

*R*-**7**·**d**<sub>1</sub>

Using **General Procedure D**, *R*-**7** of 97:3 er and 0.1 mL MeOD showed complete deuteration after 30 min and *R*-**7**·**d**<sub>1</sub> was obtained with no loss of er. There is a noticeable shift of the protonated base peak from *m/z* 128 for **7** to *m/z* 129 for **7**·**d**<sub>1</sub>.

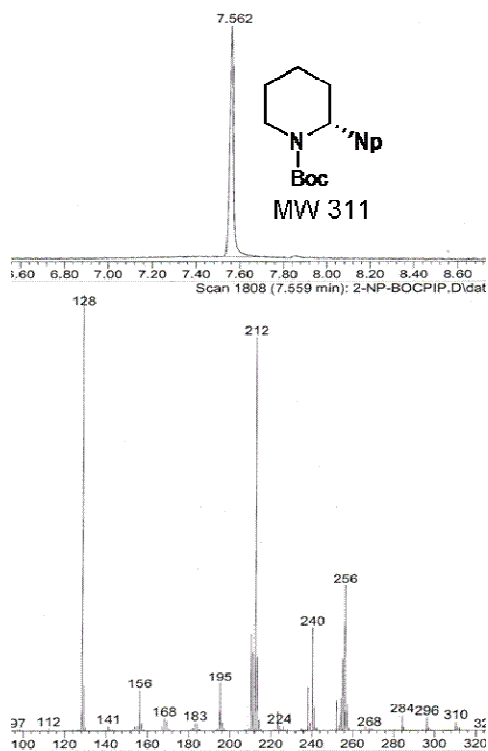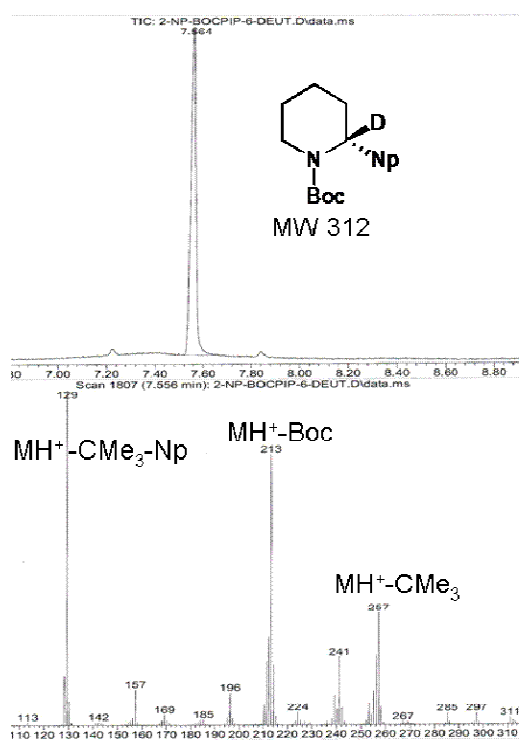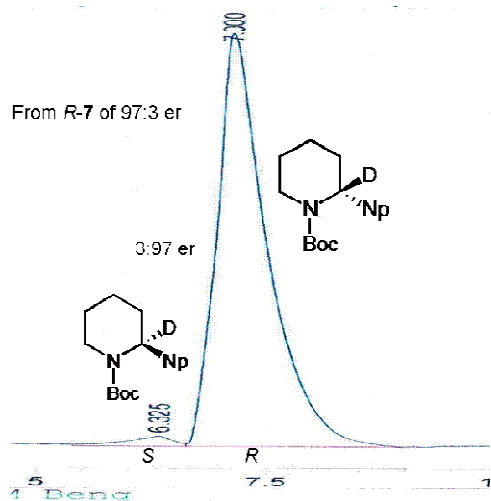

#### 5.4.2. With Me<sub>2</sub>SO<sub>4</sub>

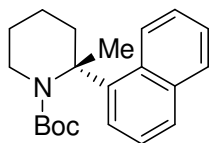

R-17

Using **General Procedure B**, R-7 of 97:3 er (311 mg, 1.0 mmol), TMEDA (0.6 mL, 4.0 mmol, 4.0 equiv), Et<sub>2</sub>O (10 mL), *s*-BuLi (1.0 mL, 1.0 mmol, 1.0 M, 1.0 equiv), Me<sub>2</sub>SO<sub>4</sub> (0.15 mL, 1.5 mmol, 1.5 equiv) for 18 h prior to addition of 2 mL MeOH, gave the crude product as an oil.

Purification by silica gel chromatography eluting with hexane-EtOAc (95:5) afforded 240 mg of *R*-**17** as an oil in 74% yield and 93:7 er.  $^1\text{H}$  NMR (300 MHz,  $\text{CDCl}_3$ )  $\delta$  = 8.34–7.37 (m, 6H), 4.35 (dd, 1H), 3.50 (m, 1H), 2.22 (m, 1H), 2.05–1.51 (m, 17H),  $^{13}\text{C}$  NMR (75.5 MHz,  $\text{CDCl}_3$ )  $\delta$  = 155.4 (C=O), 139.1 (C), 134.0 (C) 131.5 (C), 128.9 (CH), 127.3 (CH), 125.8 (CH), 125.4 (CH), 124.9 (CH), 123.5 (CH), 123.2 (CH) 79.5, 60.4 (C), 41.6 ( $\text{CH}_2$ ), 41.2 ( $\text{CH}_2$ ), 28.3 (3 x  $\text{CH}_3$ ), 27.2 ( $\text{CH}_3$ ), 25.1 ( $\text{CH}_2$ ), 20.3 ( $\text{CH}_2$ ). The enantiomer ratio was evaluated by CSP-SFC, monitoring at 210 nm, by comparison with an authentic racemic sample, under the following column conditions: **Column:** Pirkle Whelk-O-1, **Flow Rate** = 1.0 mL/min, **Polarity Modifier** = 3.0% EtOH. The minor enantiomer elutes after ~15.6 min and the major elutes after ~17.3 min.

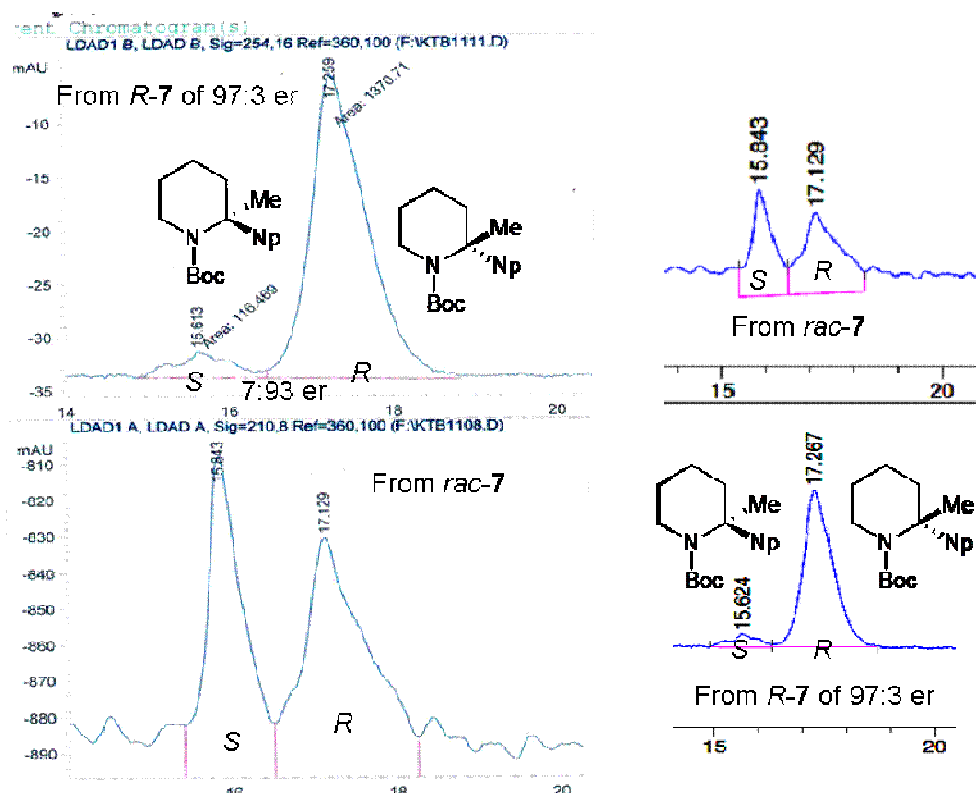

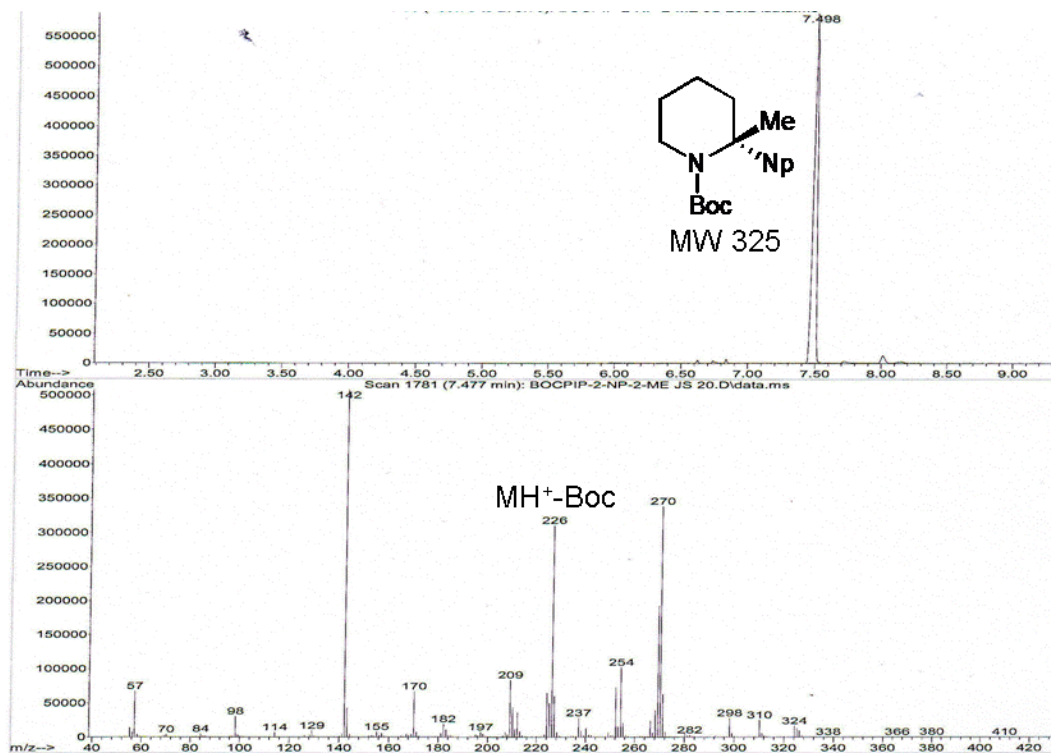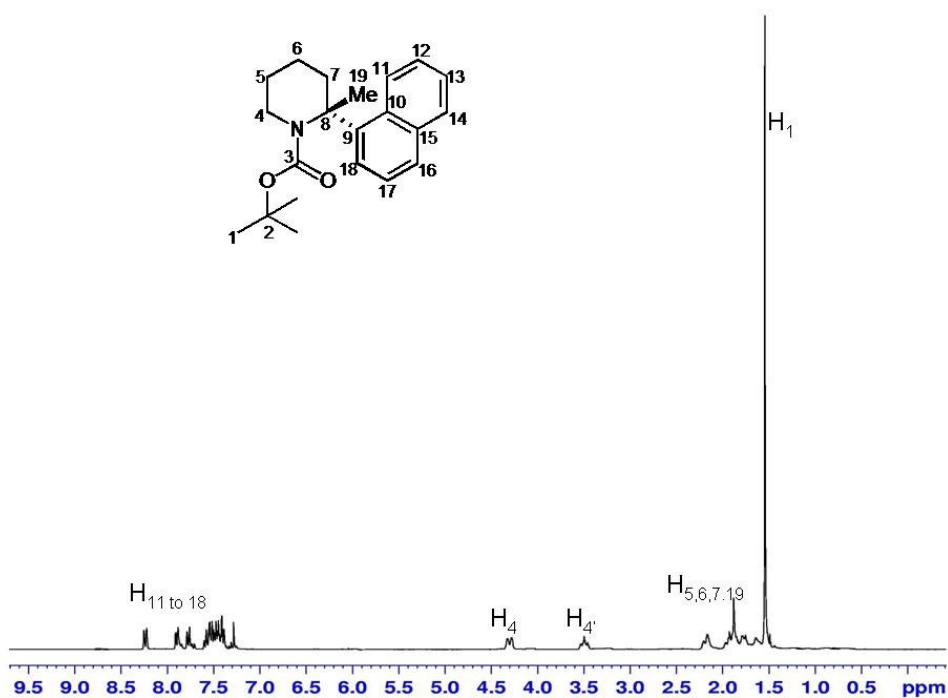

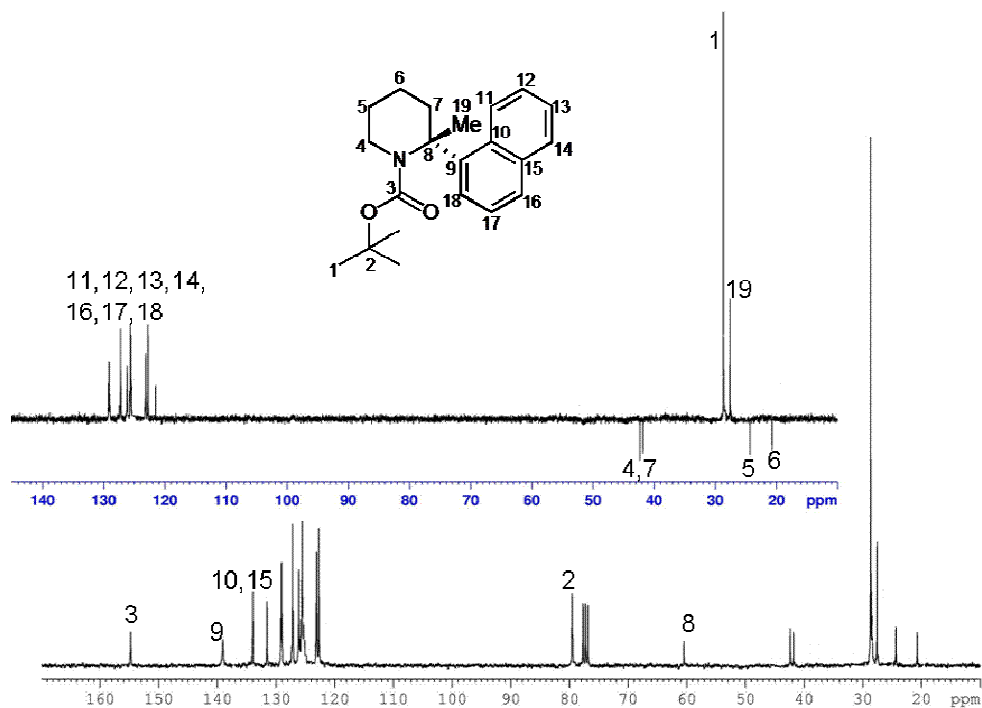

## 6. Synthesis of *N*-Boc-2-arylpyrrolidine

*R*-**18** (96:4 er) was synthesized using the Campos procedure<sup>9</sup>. Subsequent syntheses of (*R*)-*N*-Boc-2-arylpyrrolidines were accomplished using the two-ligand catalytic asymmetric deprotonation-transmetalation-Negishi coupling method reported by O'Brien and Campos.<sup>5</sup>

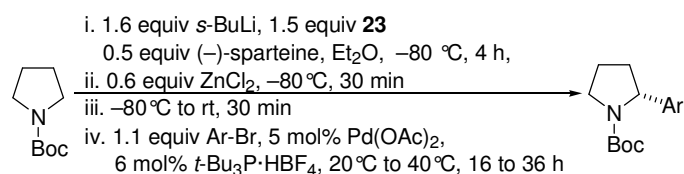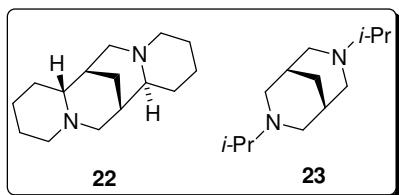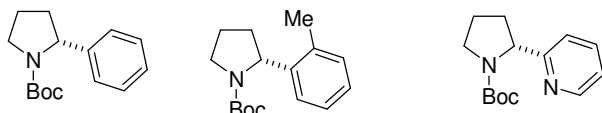

*R*-**18** (77%, 96:4 er)   *R*-**19** (80%, 90:10 er)   *R*-**20** (66%, 90:10 er)



(*S*)-*N*-Boc-2-phenylpyrrolidine of 96:4 er was synthesized using Beak's lithiation-cyclization procedure<sup>4</sup> with (-)-sparteine. When (-)-sparteine was replaced by TMEDA, the racemic 2-arylpyrrolidines, (for er evaluation purposes on CSP-SFC) were prepared in 10 mg scale.

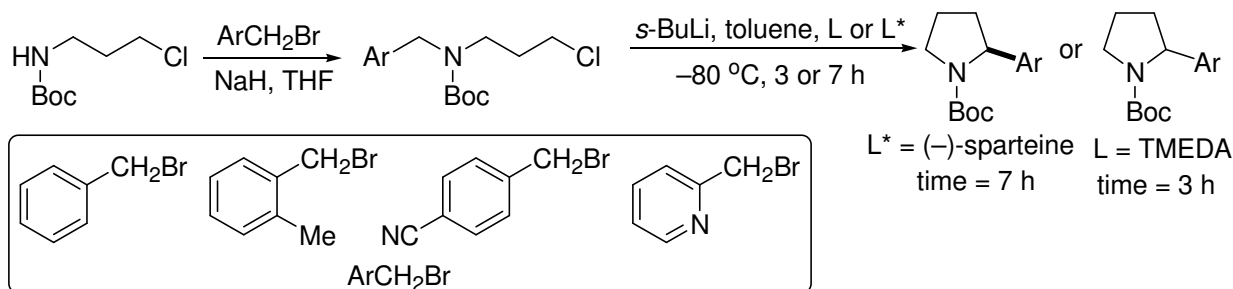

**Note:** The racemic lithiation of *N*-Boc-pyrrolidine in the presence of TMEDA proceeds in very low yield under the Campos conditions.<sup>5</sup> In some cases the racemic arylation was accomplished using the diamine-free route reported by O'Brien and coworkers.<sup>10</sup>

## 7. Lithiation-substitution of (*R*)-*N*-Boc-2-phenylpyrrolidine

### 7.1. Lithiation-substitution with MeOD

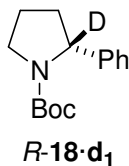

Using **General Procedure G**, *R*-**18** of 96:4 er and 0.1 mL MeOD showed complete deuteration after 3 h and *R*-**18**·d<sub>1</sub> was obtained with no loss of er. There is a noticeable shift of the protonated base peak from *m/z* 192 for **18** to *m/z* 193 for *R*-**18**·d<sub>1</sub>.

*S*-**18** of 96:4 er also gave the same results.

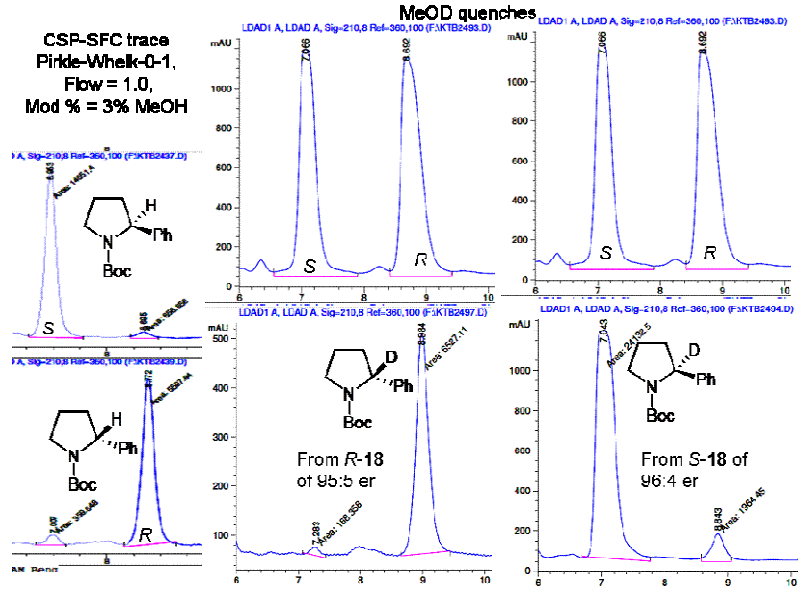

**GC-MS traces from chemical ionization**

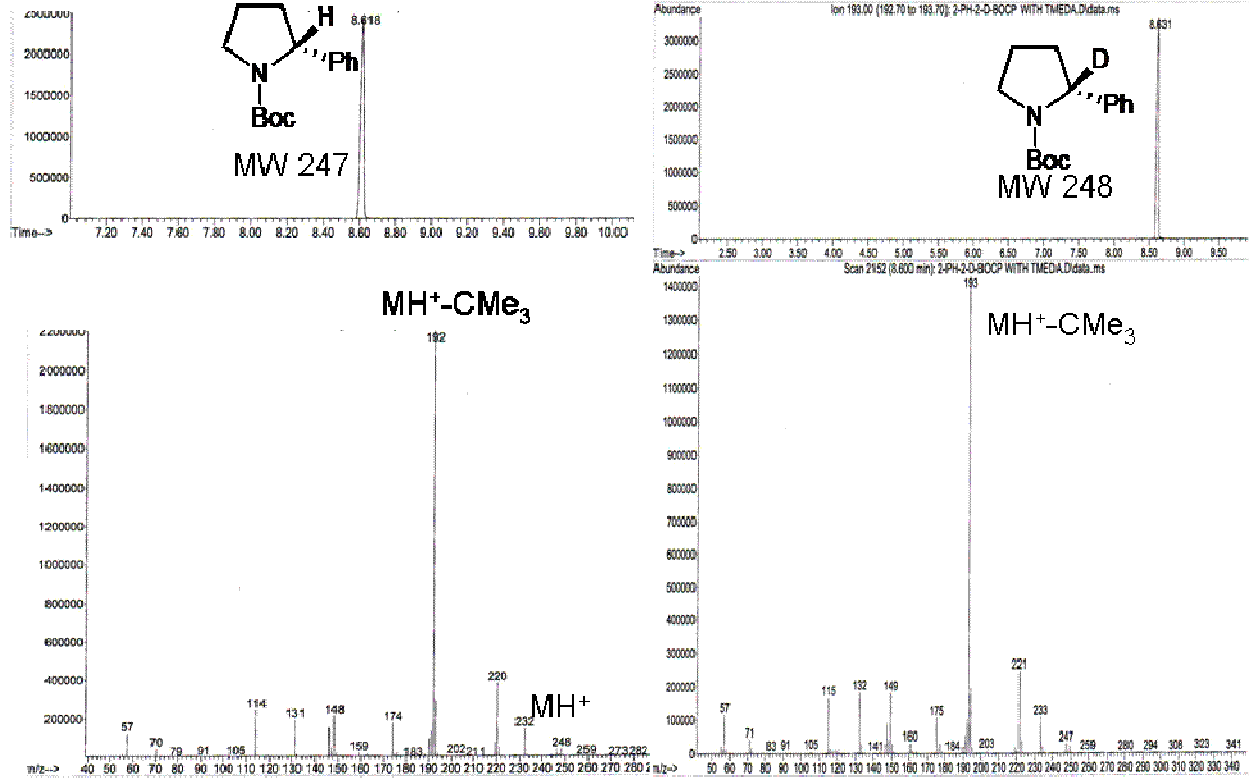

## 7.2. Lithiation-substitution with Me<sub>2</sub>SO<sub>4</sub>

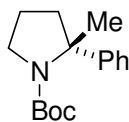

**R-25**

Using **General Procedure H**, **R-18** of 96:4 er (247 mg, 1.0 mmol), TMEDA (0.15 mL, 1.0 mmol, 1.0 equiv), Et<sub>2</sub>O (10 mL), *n*-BuLi (0.5 mL, 1.0 mmol, 2.0 M, 1.0 equiv), Me<sub>2</sub>SO<sub>4</sub> (0.15 mL, 1.5 mmol, 1.5 equiv) for 8 h at -60 °C prior to addition of 2 mL MeOH, gave the crude product as an oil. Purification by silica gel chromatography eluting with hexane-EtOAc (95:5) afforded 224 mg of **R-25** as an oil in 86% yield and 94:6 er. All other spectroscopic data as reported for *rac*-**25**.<sup>7</sup> The enantiomer ratio was evaluated by CSP-SFC, monitoring at 210 nm, by comparison with an authentic racemic sample, under the following column conditions: **Column:** Pirkle Whelk-O-1, **Flow Rate** = 2.0 mL/min, **Polarity Modifier** = 2.0% EtOH. The minor enantiomer elutes after ~5.6 min and the major elutes after ~7.6 min.

**CSP-SFC trace**  
Pirkle-Whelk-O-1, Flow = 2.0, Mod % = 2% MeOH  
Me<sub>2</sub>SO<sub>4</sub> quench after 3 h of lithiation at -60 °C in ether

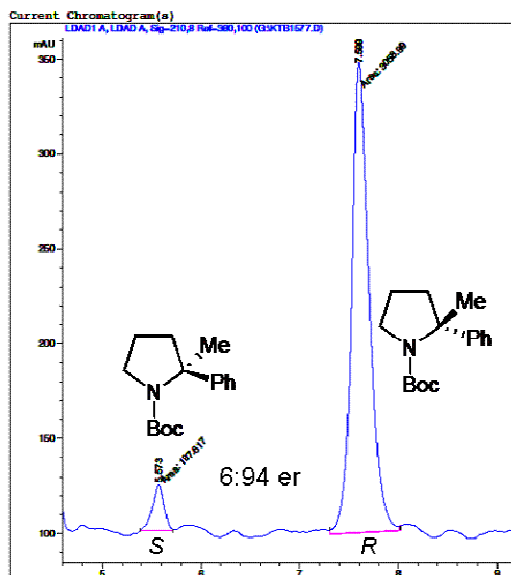

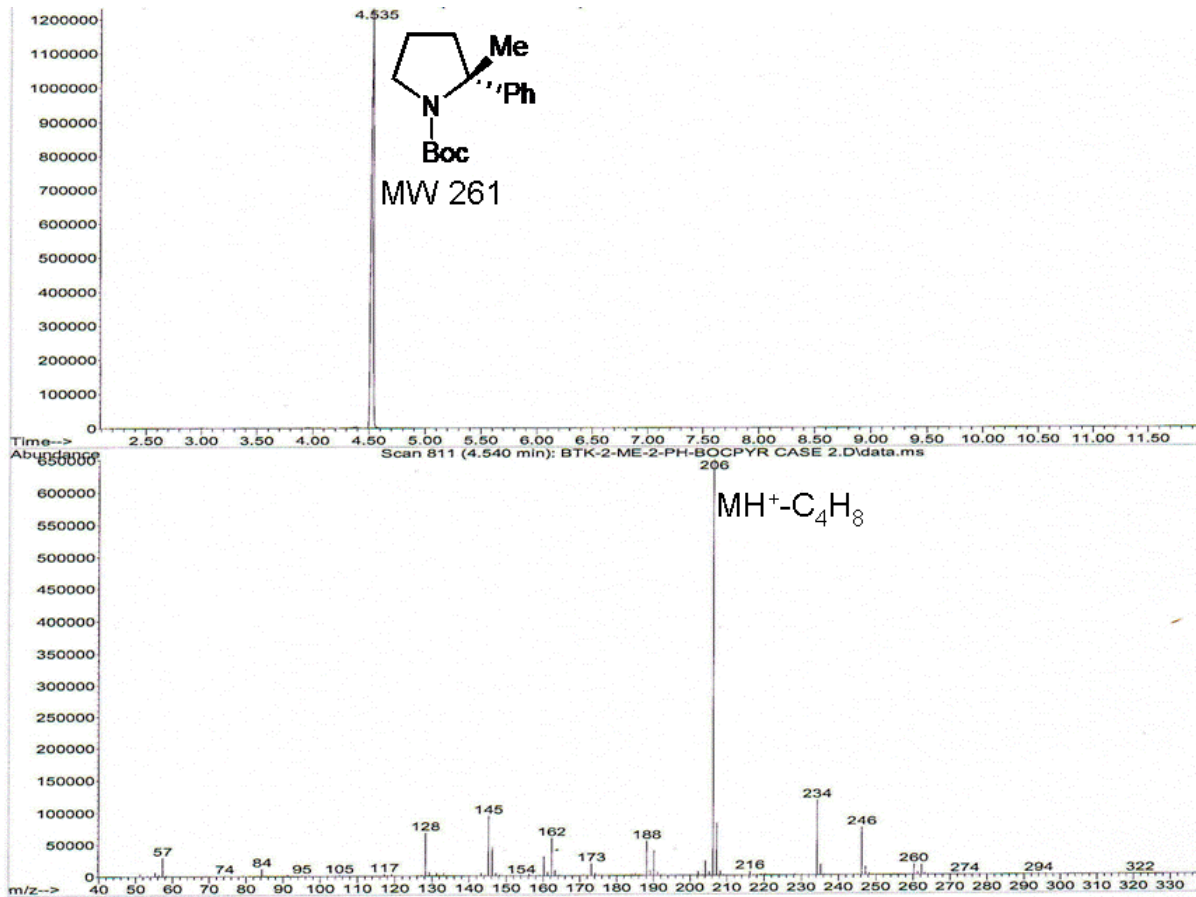

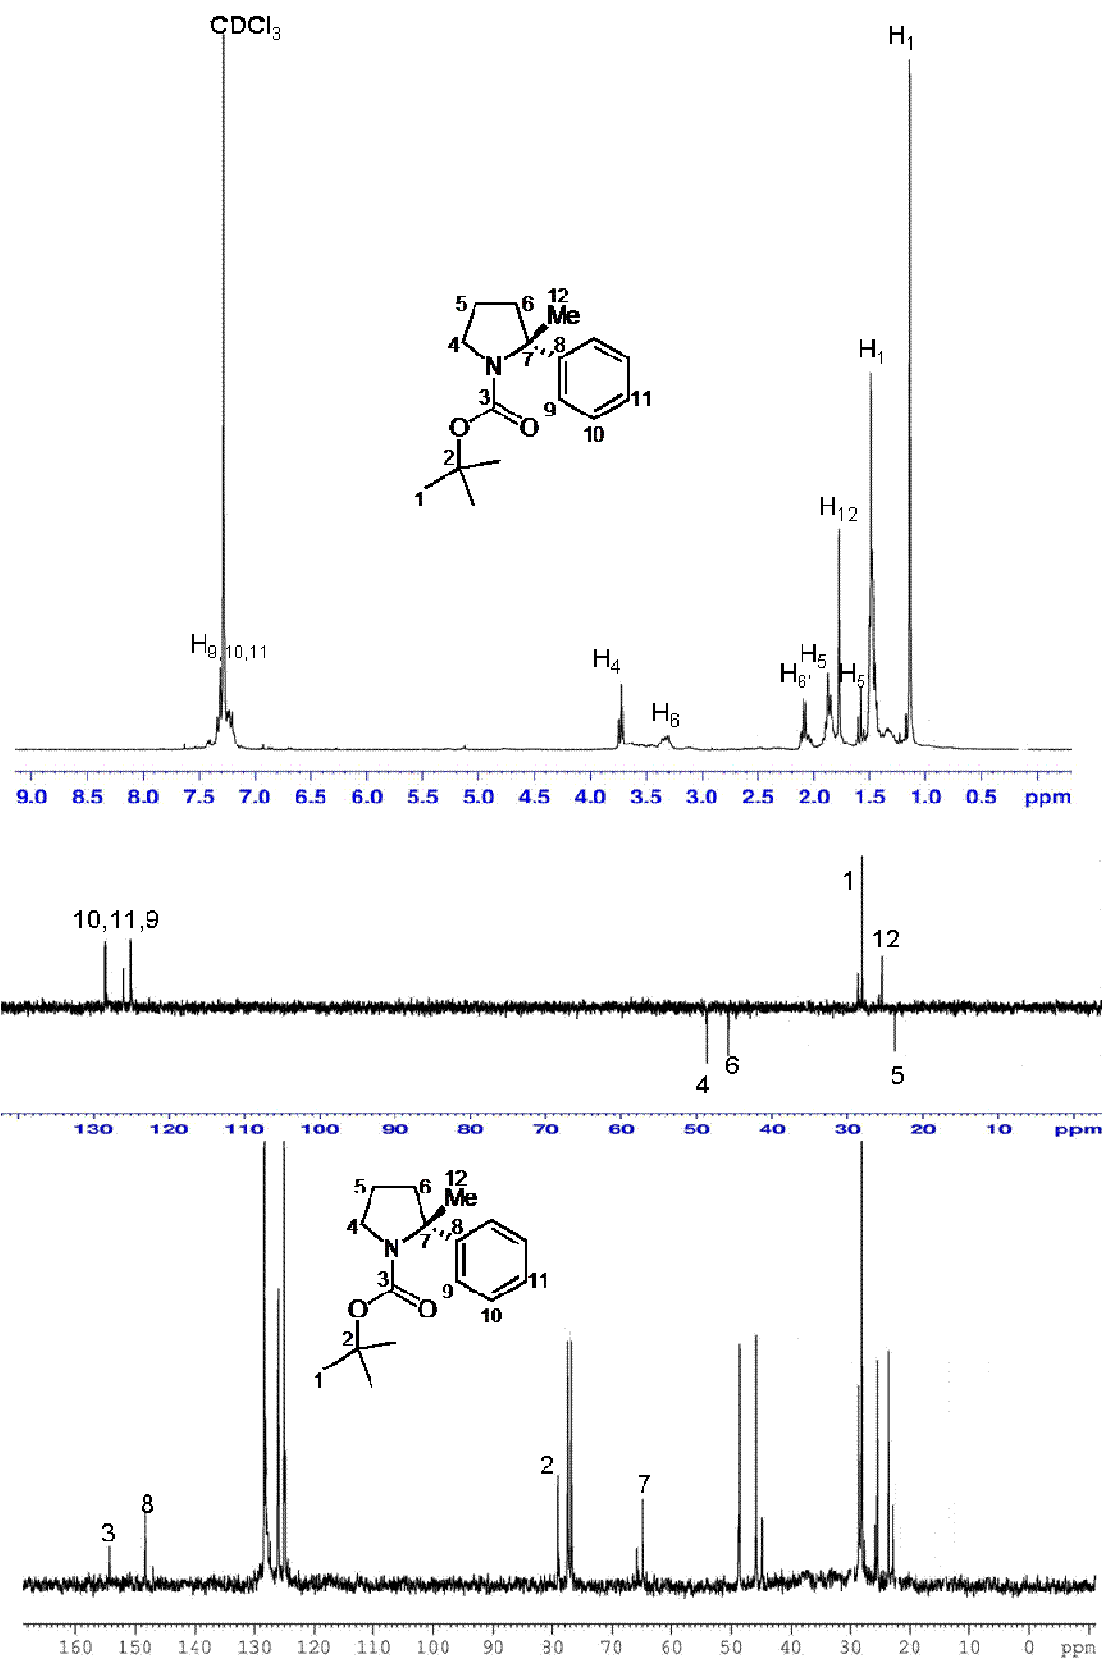

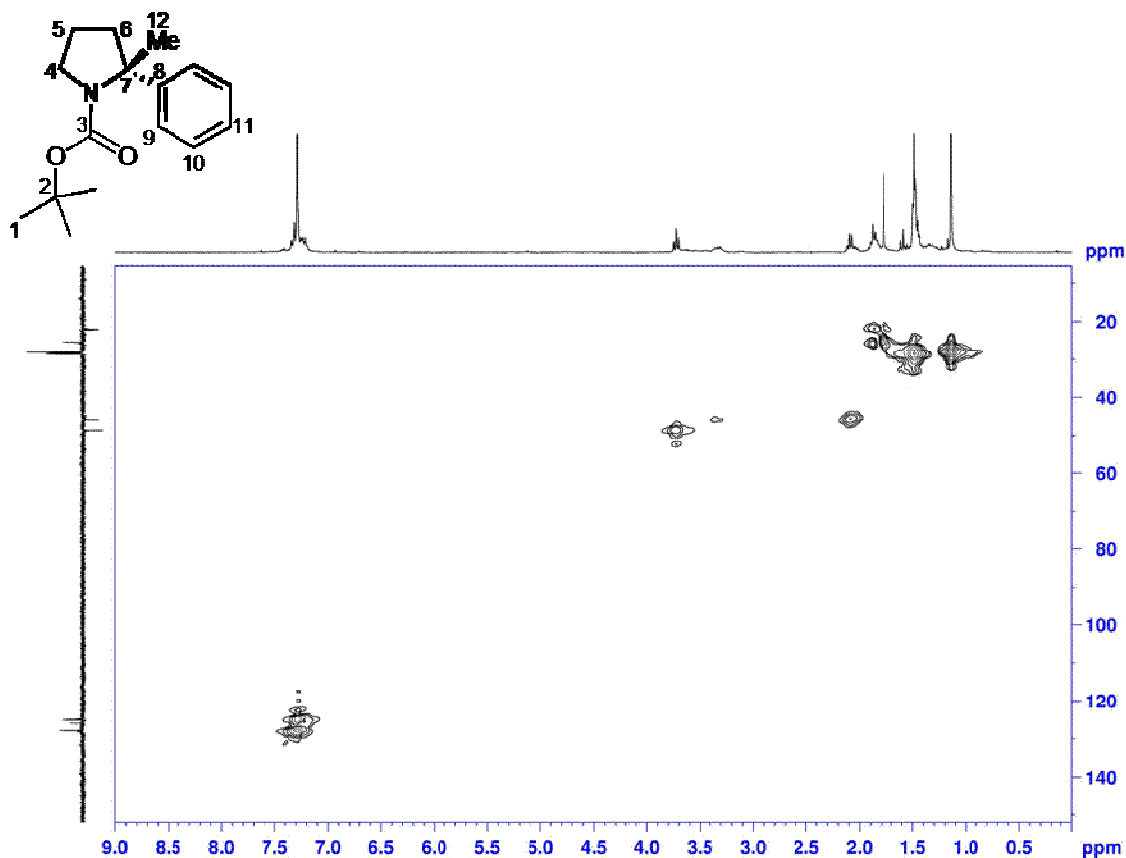

### 7.3. Lithiation-substitution with dimethyl formamide

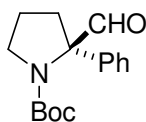

**R-26**

Using **General Procedure B**, **R-18** of 96:4 er (247 mg, 1.0 mmol), TMEDA (0.15 mL, 1.0 mmol, 1.0 equiv), Et<sub>2</sub>O (10 mL), *s*-BuLi (1.0 mL, 1.0 mmol, 1.0 M, 1.0 equiv), dimethyl formamide (0.12 mL, 1.5 mmol, 1.5 equiv) for 8 h at  $-80\text{ }^{\circ}\text{C}$  prior to addition of 2 mL MeOH, gave the crude product as an oil in 96:4 er. Purification by silica gel chromatography eluting with hexane-EtOAc (80:20) afforded 228 mg of **R-26** as an oil in 83% yield ([note 3](#)) and >99:1 er. <sup>1</sup>H NMR (300 MHz, CDCl<sub>3</sub>), mixture of rotomers,  $\delta$  9.8–9.6 (1H, s, H of CHO), 7.55–7.10 (5H, m, Ph), 3.72 (2H, br, NCH), 2.44 (1H, br, CH), 2.02 (1H, br, CH), 1.92–1.15 (11H, m). <sup>13</sup>C NMR (75.5 MHz, CDCl<sub>3</sub>)  $\delta$  = 198.2 and 197.5 (C=O of aldehyde), 153.7 (C=O), 138.8 (C), 128.3 (CH), 128.0 (CH), 127.3 (CH) and 126.3 (CH), 81.2 and 80.6 (C), 74.3 (C), 47.9 (CH<sub>2</sub>), 39.3 and 38.3 (CH<sub>2</sub>), 28.4 and 28.0 (3 x CH<sub>3</sub>), 23.4 and 22.4 (CH<sub>2</sub>). The enantiomer ratio was evaluated by CSP-SFC, monitoring at 210 nm, by comparison with an authentic racemic sample, under the

following column conditions: **Column:** Pirkle Whelk-O-1, **Flow Rate** = 1.0 mL/min, **Polarity Modifier** = 5.0% EtOH. The major enantiomer elutes after ~7.8 min and the minor elutes after ~9.6 min.

**Note 3:** The total yield includes some amount of the C-5 aldehyde obtained due to competitive lithiation at C-5 under the reaction conditions. Spectral data are based on a carefully re-chromatographed sample.

The experiment was repeated using General Procedure H but only the GC yield (88%) was obtained and the product wasn't purified further.

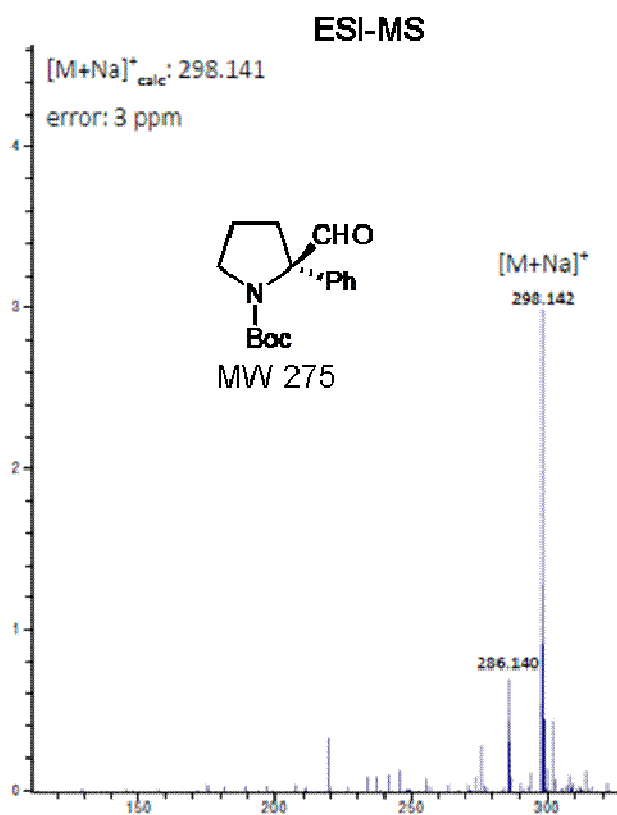

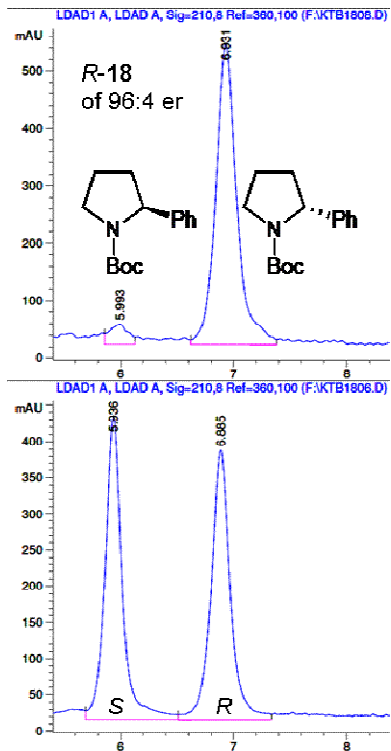

CSP-SFC trace  
Pirkle-Whelk-0-1, Flow = 1.0, Mod % = 5% MeOH  
DMF quench

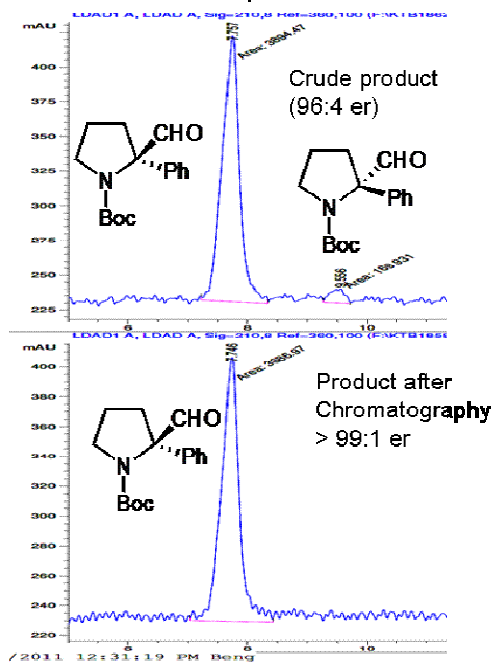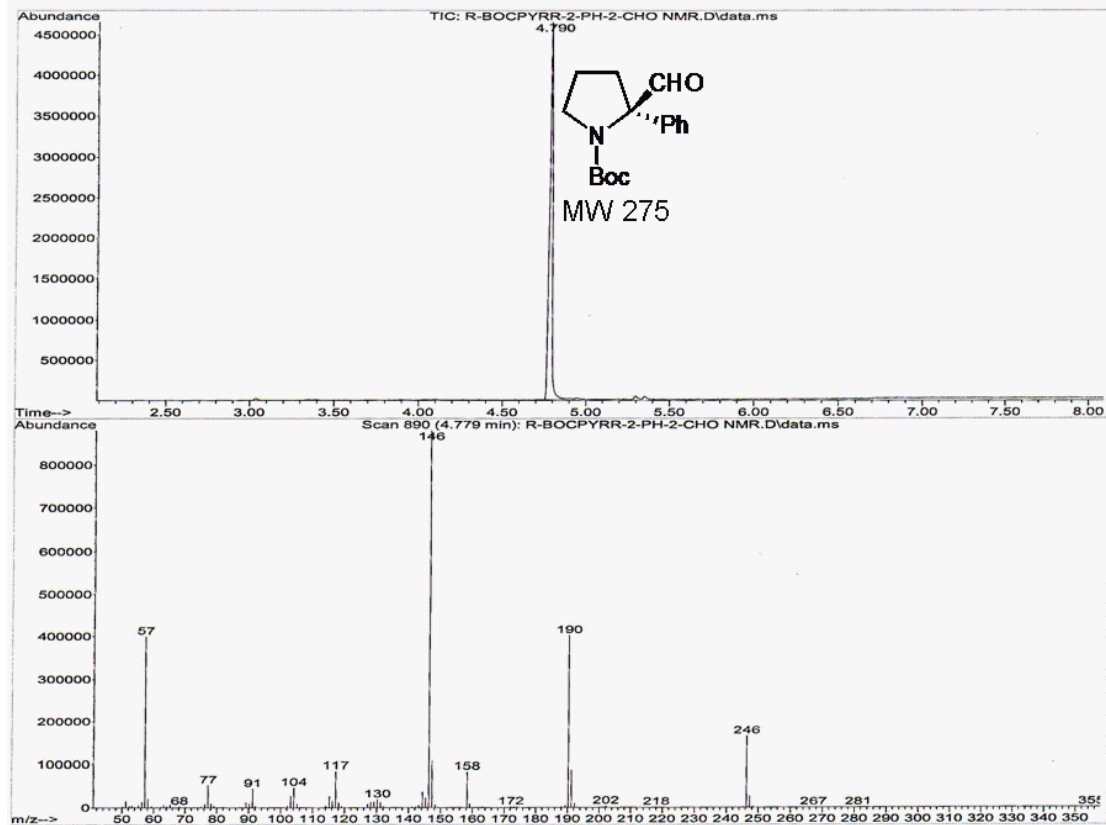



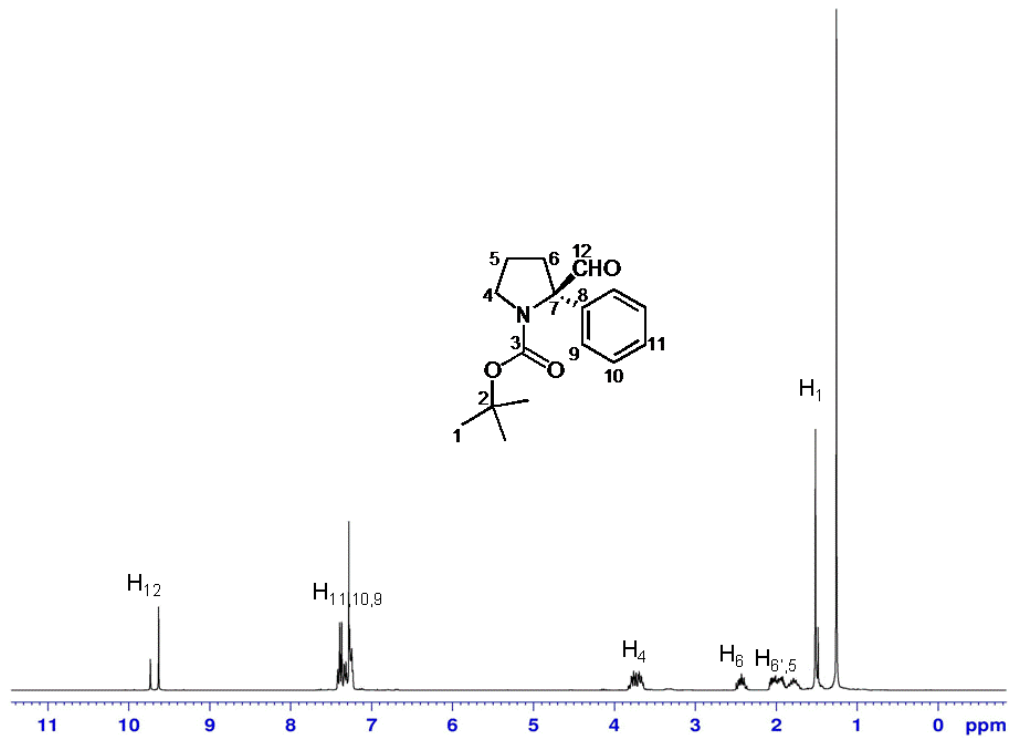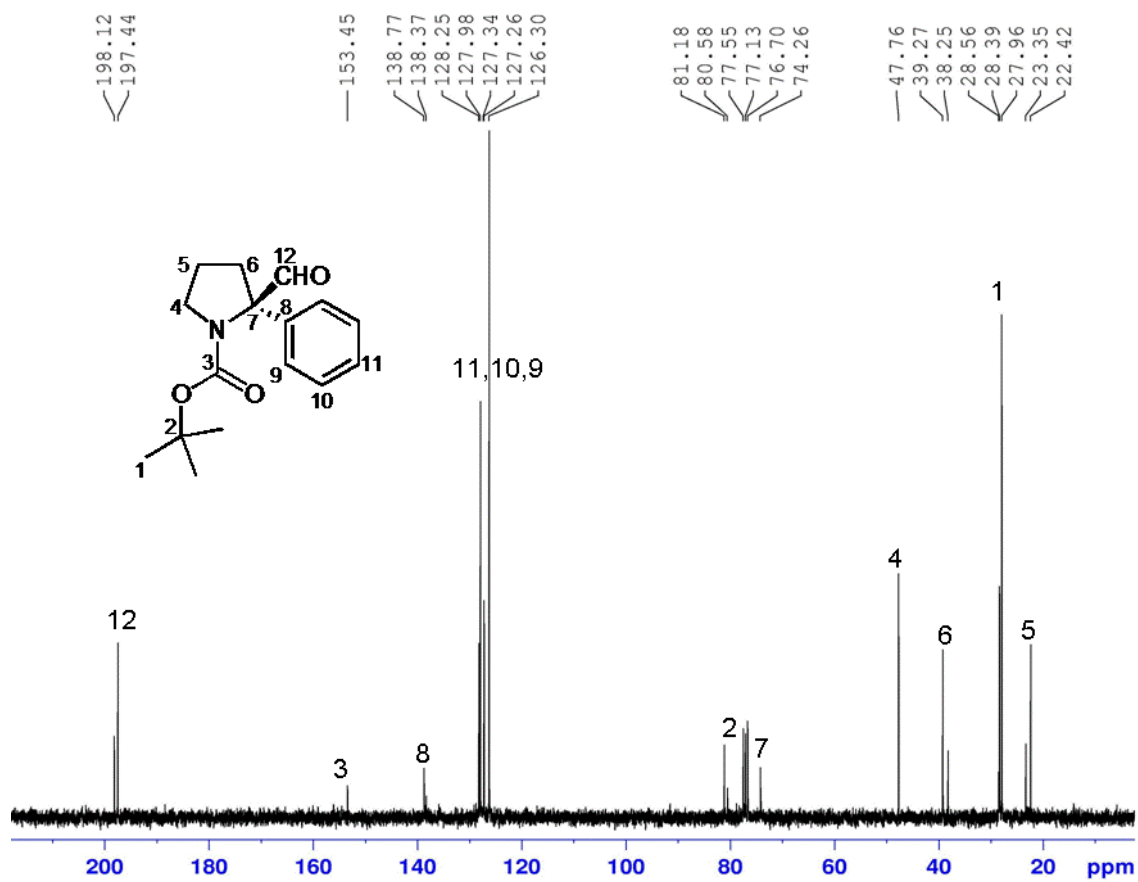

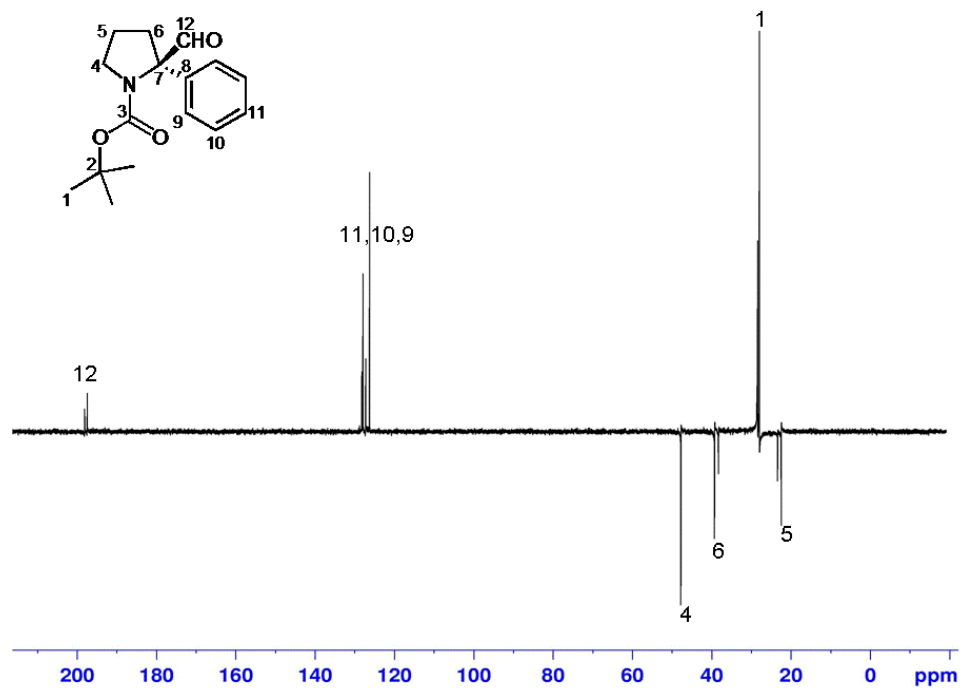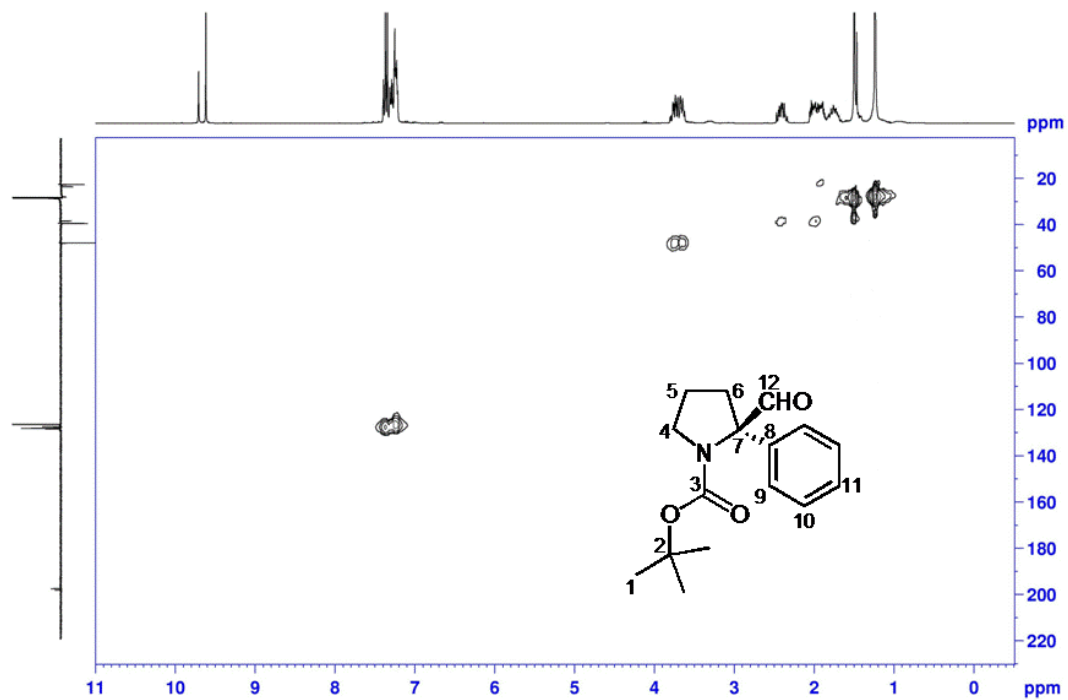

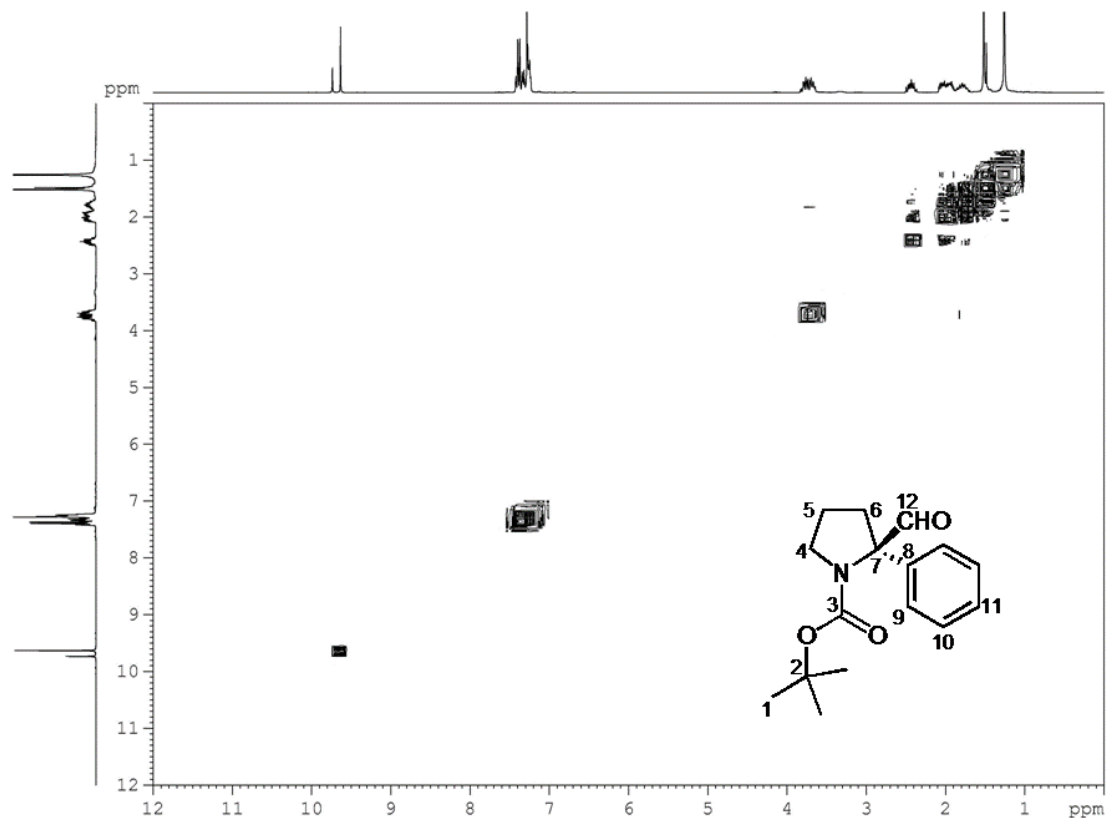

#### 7.4. With EtOCOCl

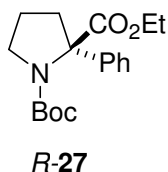

Using **General Procedure H**, **R-18** of 96:4 er (247 mg, 1.0 mmol), TMEDA (0.15 mL, 1.0 mmol, 1.0 equiv), Et<sub>2</sub>O (10 mL), *s*-BuLi (1.0 mL, 1.0 mmol, 1.0 M, 1.0 equiv), EtOCOCl (0.13 mL, 1.5 mmol, 1.5 equiv) for 2 h (note 4) prior to addition of 2 mL MeOH and warming to rt, gave the crude product as an oil. Purification by silica gel chromatography eluting with hexane-EtOAc (75:25) afforded 283 mg of **R-27** as an oil in 70% yield (note 5) and 94:6 er. <sup>1</sup>H NMR (300 MHz, CDCl<sub>3</sub>), mixture of rotomers, δ 7.48–7.15 (5H, m), 4.40–4.11 (2H, m), 3.57 (1H, m), 3.41 (1H, m), 2.65 (1H, m), 2.35 (1H, m), 1.97–1.15 (14H, m). <sup>13</sup>C NMR (75.5 MHz, CDCl<sub>3</sub>) δ = 172.2 (C=O of ester), 154.3 (C=O), 140.1 (C), 127.8 (CH), 125.1 (CH), 126.8 (CH), 79.5 (C), 72.5 (C), 61.6 (CH<sub>2</sub>), 48.1 (CH<sub>2</sub>), 44.5 (CH<sub>2</sub>), 28.1 (3 x CH<sub>3</sub>), 23.7 (CH<sub>2</sub>), and 14.1 (CH<sub>3</sub>). The enantiomer ratio was evaluated by CSP-SFC, monitoring at 210 nm, by comparison with an

authentic racemic sample, under the following column conditions: **Column:** Pirkle Welk-O-1, **Flow Rate** = 1.0 mL/min, **Polarity Modifier** = 2.0% MeOH. The minor enantiomer elutes after ~16.2 min and the major elutes after ~19.7 min.

**Note 4:** The electrophilic quench was carried out for 2 h after lithiating for 3 h.

**Note 5:** The total yield includes some amount of the C-5 ester obtained due to competitive lithiation at C-5 under the reaction conditions. Spectral data are based on a carefully re-chromatographed sample.

The experiment was repeated using General Procedure H but only the GC yield (79%) was obtained and the product wasn't purified further.

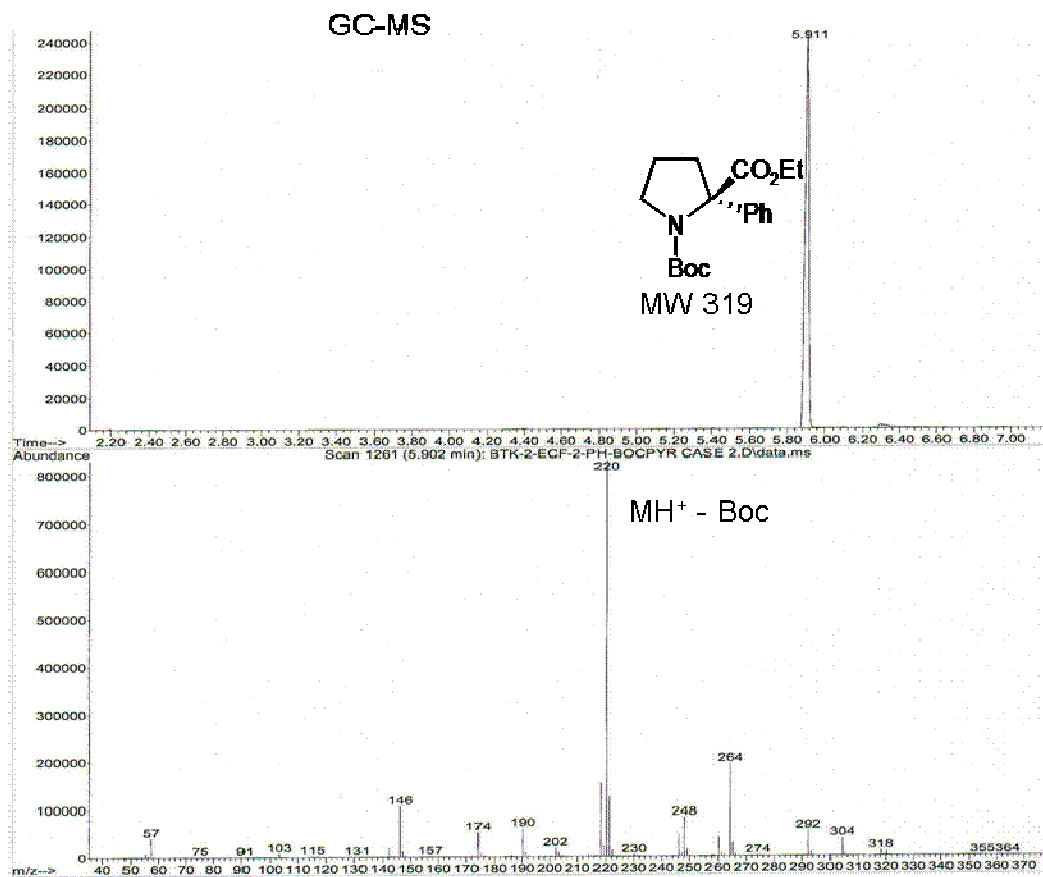

### ESI-MS

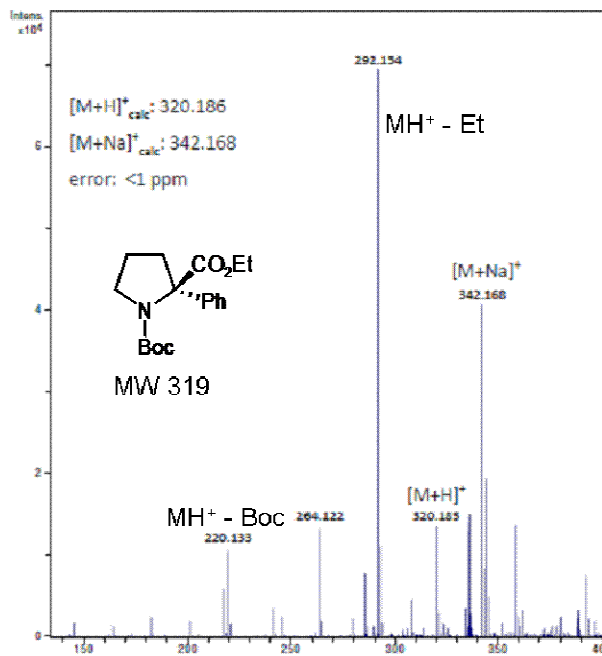

### CSP-SFC trace

Pirkle-Whelk-0-1, Flow = 1.0, Mod % = 2% MeOH

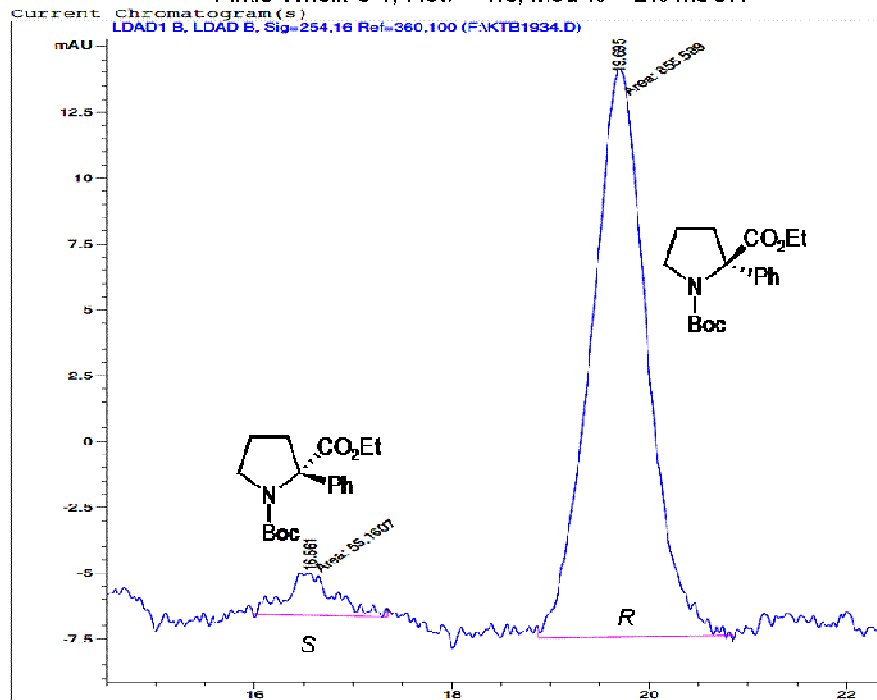

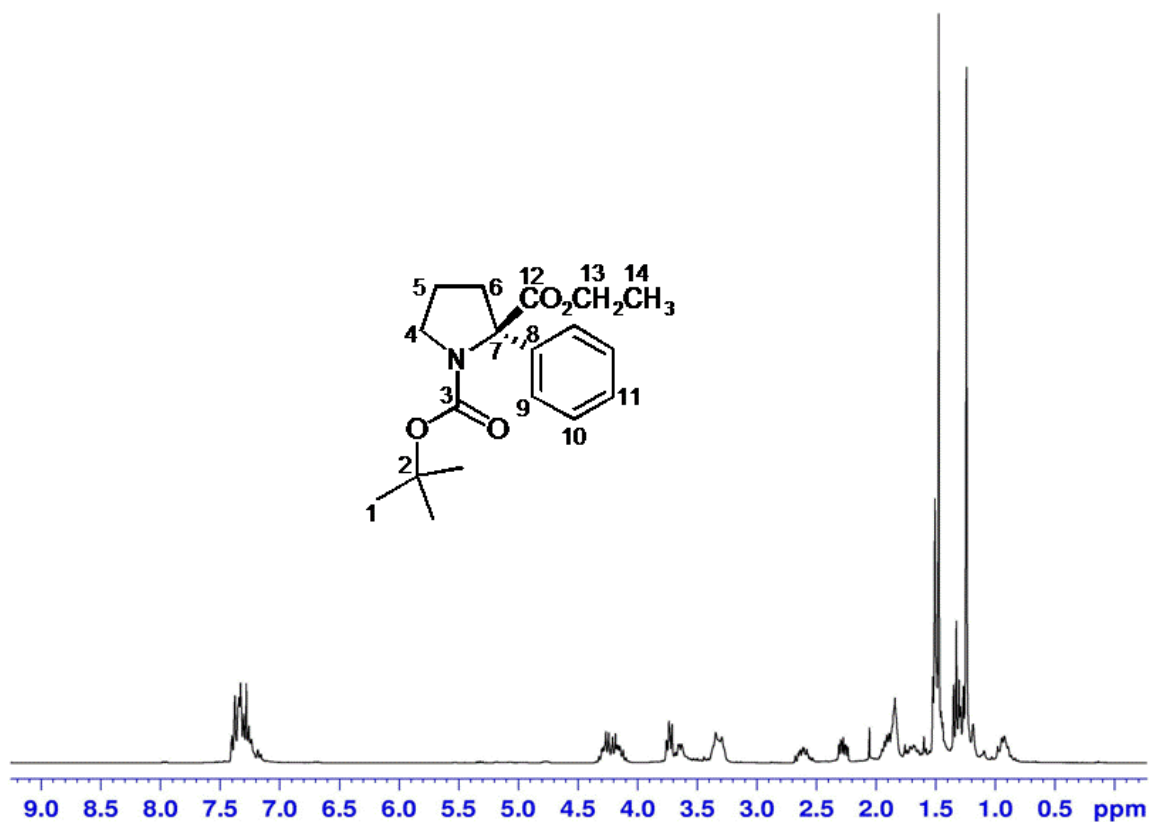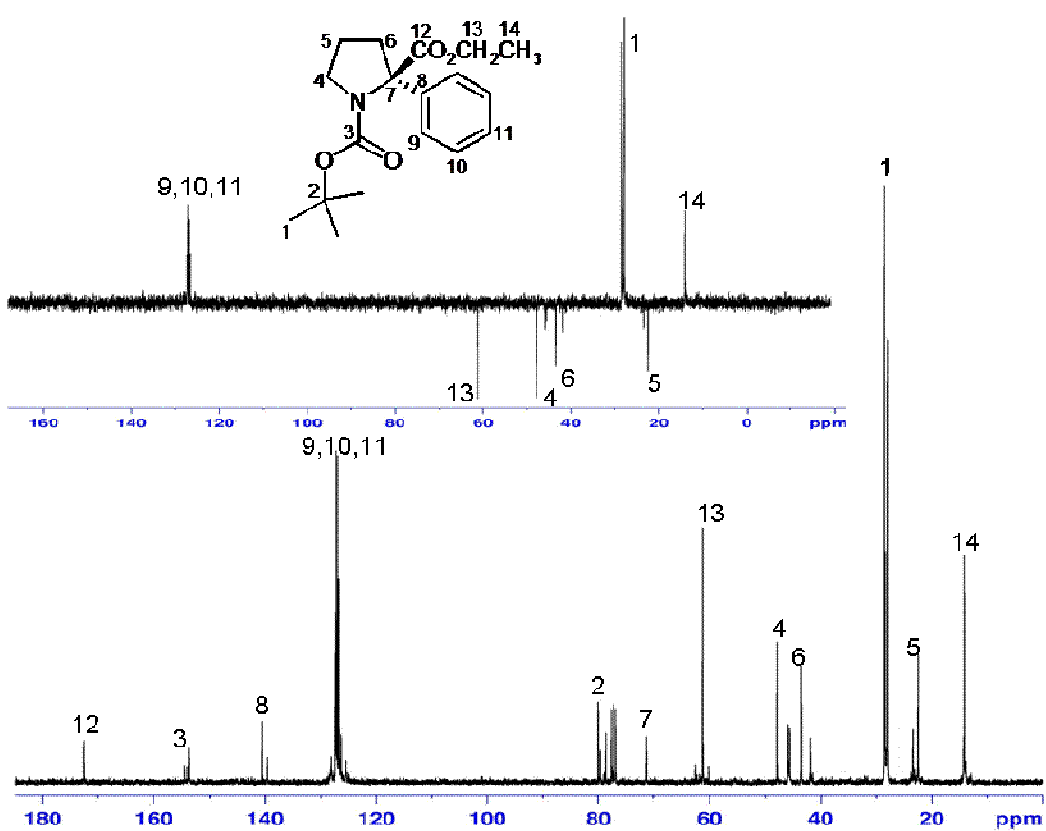

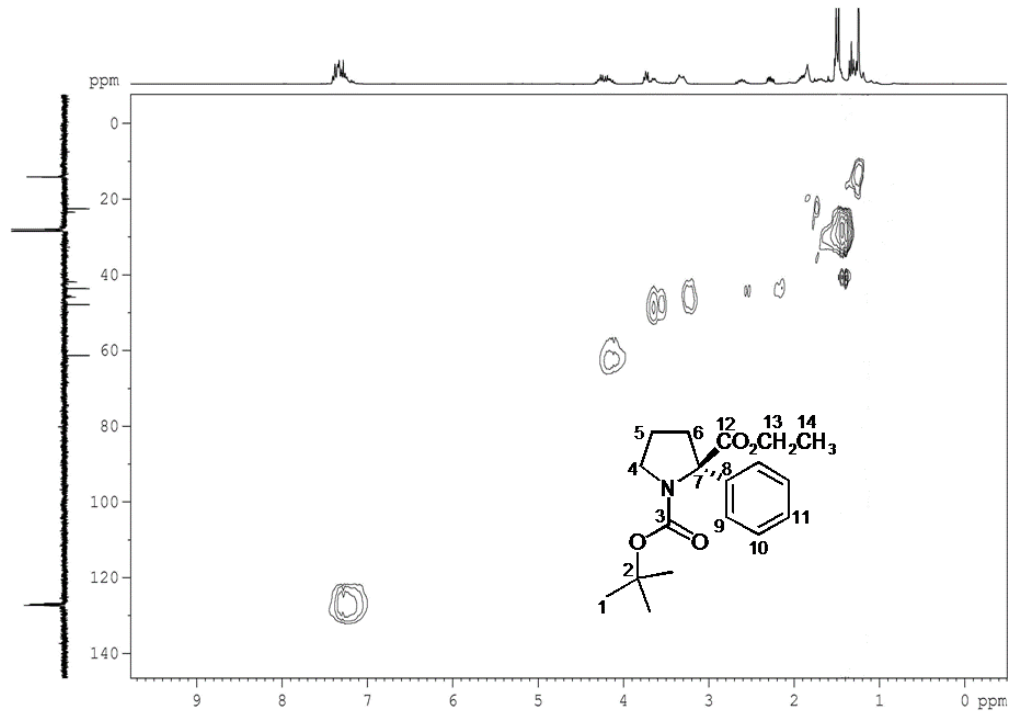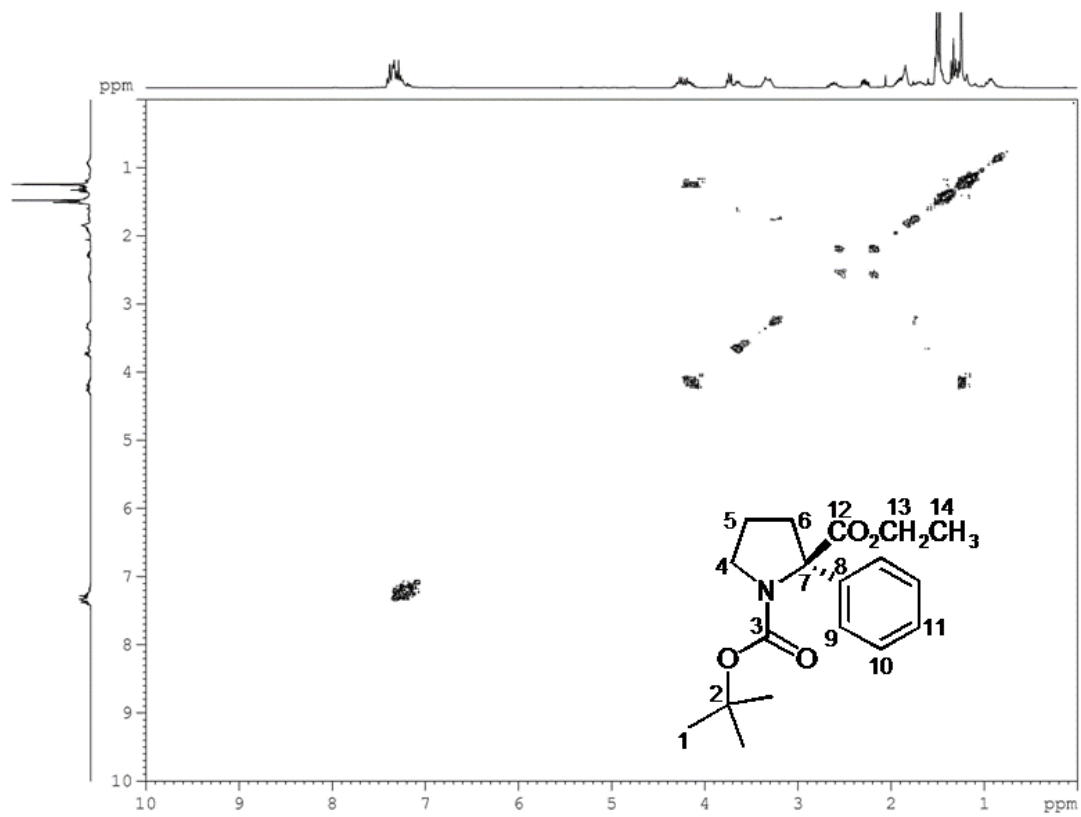

### 7.5. Lithiation-substitution with acetone-d<sub>6</sub>

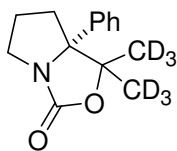

**R-28**

Using **General Procedure B**, **R-18** of 96:4 er (247 mg, 1.0 mmol), TMEDA (0.15 mL, 1.0 mmol, 1.0 equiv), Et<sub>2</sub>O (10 mL), *s*-BuLi (1.0 mL, 1.0 mmol, 1.0 M, 1.0 equiv), (CD<sub>3</sub>)<sub>2</sub>CO (96 mg, 1.5 mmol, 1.5 equiv) for 2 h (**note 6**) prior to warming to rt and addition of 2 mL MeOH gave the crude product as an oil. Purification by silica gel chromatography eluting with hexane-EtOAc (60:40) afforded 201 mg of the oxazolidinone **R-28** as an amorphous solid in 85% yield (**note 7**) and 94:6 er. <sup>1</sup>H NMR (400 MHz, CDCl<sub>3</sub>) δ = 7.55–7.15 (5H, m), 3.86 (1H, m), 3.15 (1H, m), 2.15 (1H, m), 2.10–1.15 (3H and 6D, m). <sup>13</sup>C NMR (75.5 MHz, CDCl<sub>3</sub>) δ = 161.9 (C=O), 138.1 (C), 128.6 (CH), 128.4 (CH), 127.9 (CH), 82.2 (C), 78.2 (C), 45.5 (CH<sub>2</sub>), 33.4 (CH<sub>2</sub>), 28.5 (2 x CD<sub>3</sub>), 23.5 (CH<sub>2</sub>). The enantiomer ratio was evaluated by CSP-SFC, under the following column conditions: **Column:** Pirkle Whelk-O-1, **Flow Rate** = 1.0 mL/min, **Polarity Modifier** = 2% EtOH. The minor enantiomer elutes after ~12.8 min and the major elutes after ~18.8 min.

**Note 6:** The electrophilic quench was carried out for 2 h after lithiating for 3 h.

**Note 7:** The total yield includes some amount of the C-5 oxazolidinone obtained due to competitive lithiation at C-5 under the reaction conditions. Spectral data are based on a carefully recolumned sample.

The experiment was repeated using General Procedure H but only the GC yield (92%) was obtained and the product wasn't purified further.



### GC-MS trace from electron impact ionization

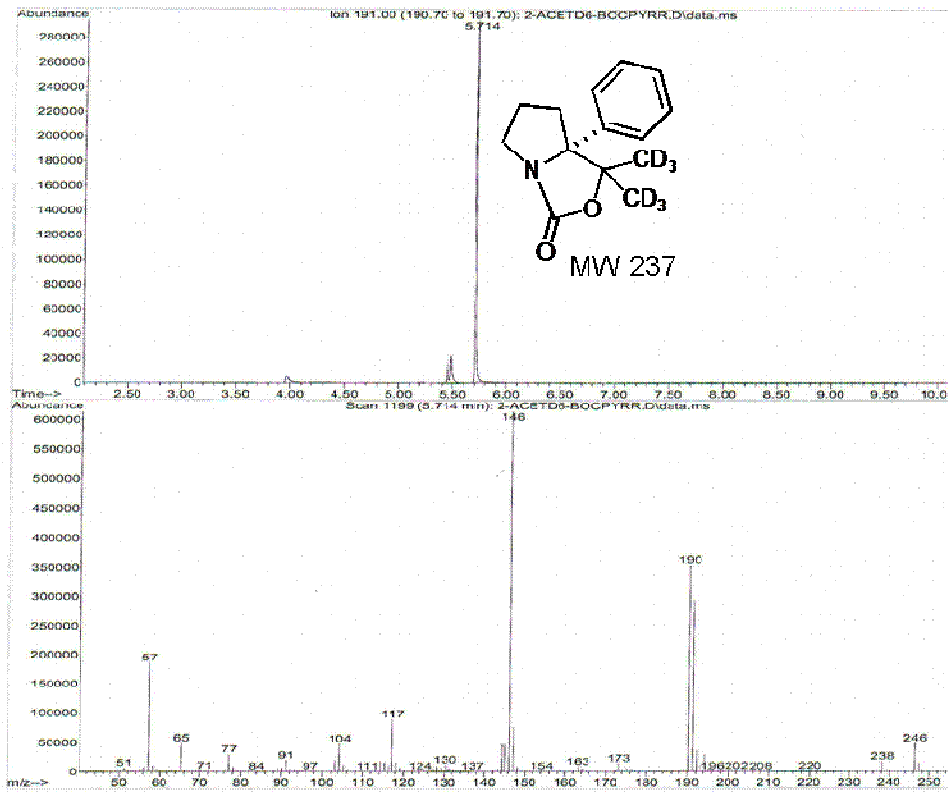

### ESI-MS

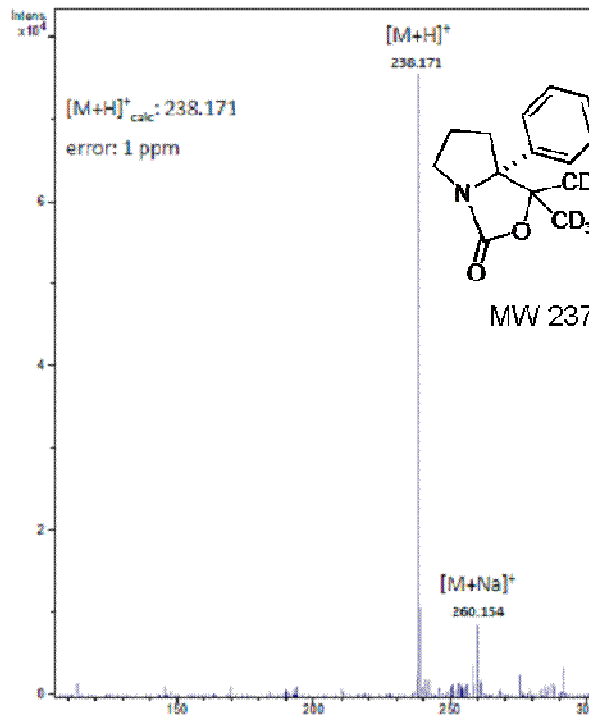

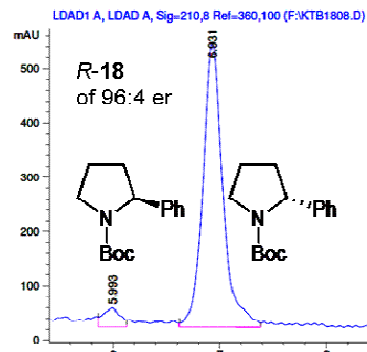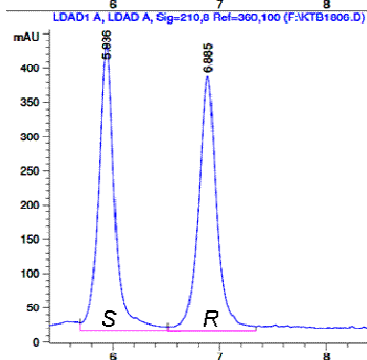

CSP-SFC trace  
Pirkle-Whelk-O-1, Flow = 1.0, Mod % = 2% MeOH

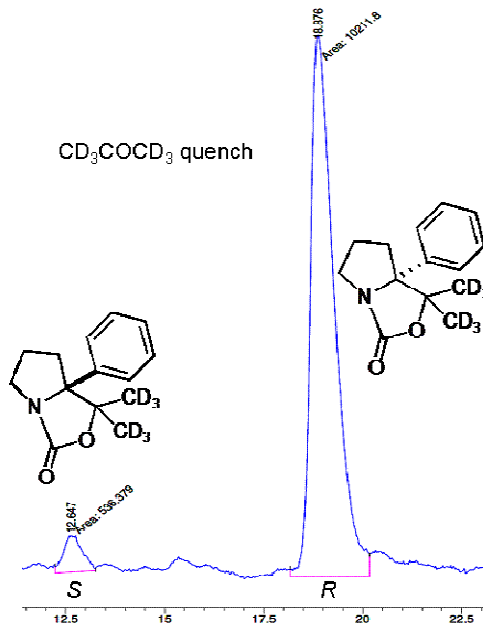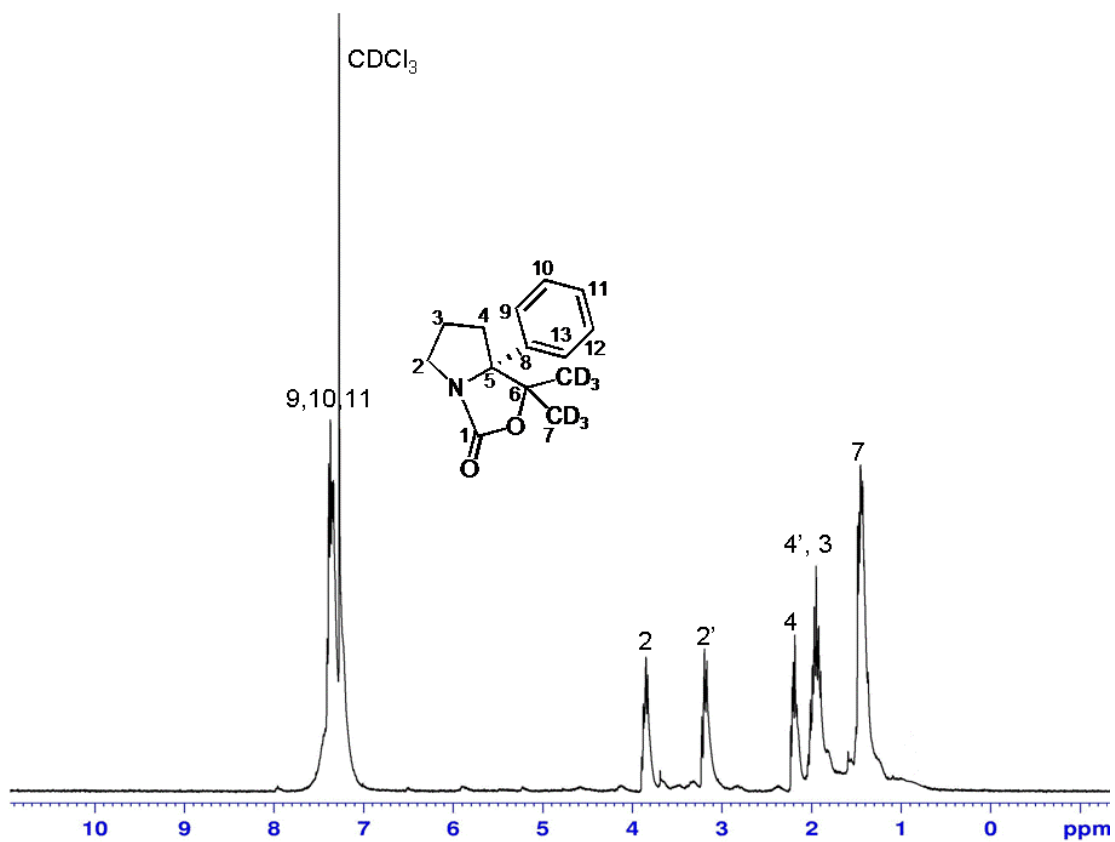

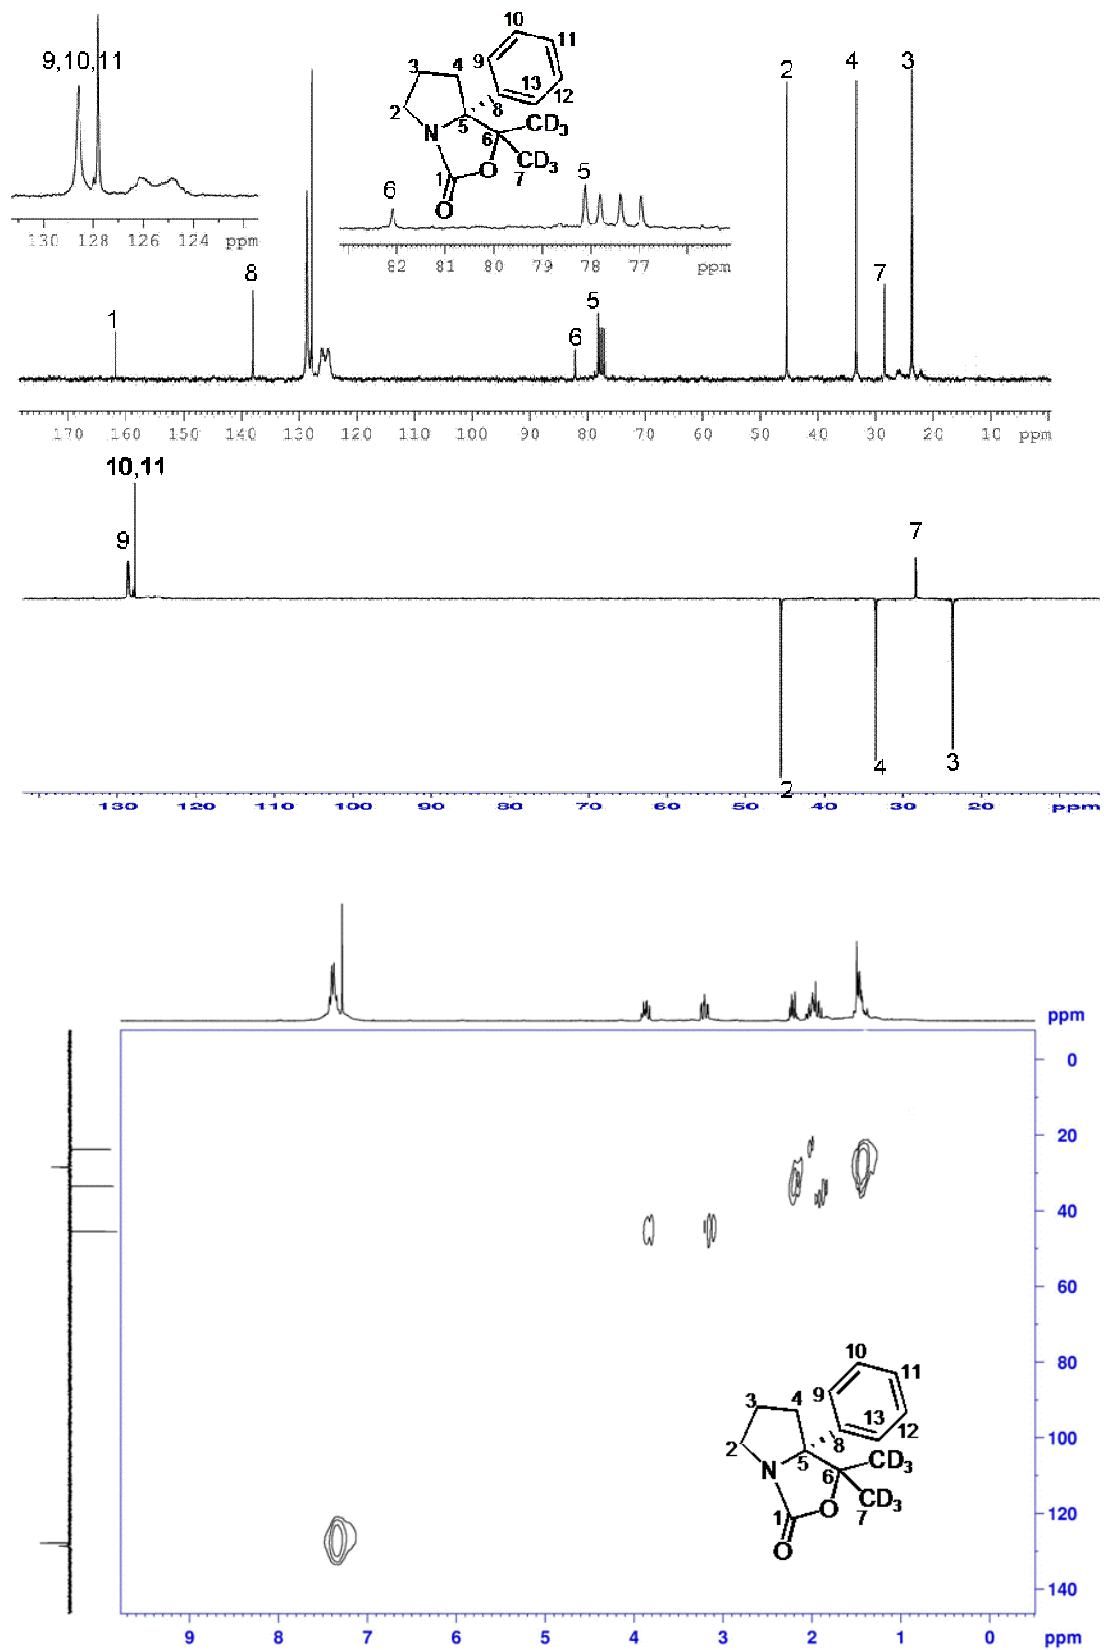

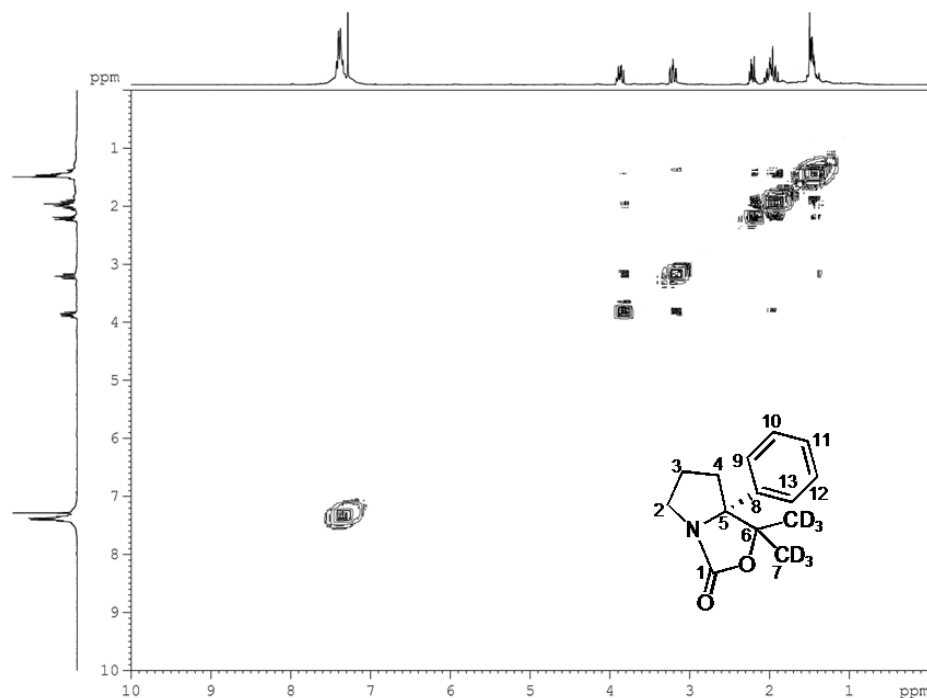

## 7.6. With 2-bromotoluene

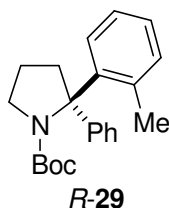

To an oven-dried, septum-capped round bottom flask equipped with a stir bar, was added *R-18* of 96:4 er (247 mg, 1.0 mmol, 1.0 equiv) in Et<sub>2</sub>O (5 mL) under argon. The mixture was cooled to –60 °C and a solution of *s*-BuLi in hexanes (1.0 mL, 1.0 mmol, 1.0 M, 1.0 equiv) was added slowly. After 3 h at this temperature, a solution of ZnCl<sub>2</sub> (0.6 mL, 1.0 M solution in Et<sub>2</sub>O, 0.6 equiv), was added slowly over a two minute period and the mixture was stirred for 30 minutes followed by warming to room temperature. After 30 minutes, Pd(OAc)<sub>2</sub> (10 mg, 4 mol%), *t*-Bu<sub>3</sub>P·HBF<sub>4</sub> (23 mg, 8 mol%) and 2-bromotoluene (0.15 mL, 1.1 mmol, 1.1 equiv) were added sequentially. After stirring for 48 h at room temperature, NH<sub>4</sub>OH (5 mL, 10% aqueous solution) was added dropwise and the mixture was stirred for 30 minutes. The resulting slurry was filtered through Celite and rinsed with 5 mL Et<sub>2</sub>O. The filtrate was washed with 1 M HCl<sub>(aq)</sub> (10 mL), then with water (2 x 5 mL), dried over Na<sub>2</sub>SO<sub>4</sub> and evaporated under reduced pressure to obtain the crude product. Purification by silica gel chromatography eluting with hexane-EtOAc (90:10) afforded *R-29* as an oil in less than 10% yield and 92:8 er.

**Note 8:** When the lithiation of *R*-**18** was carried out using the conditions in **General Procedure H**, followed by arylation as described above, we obtained 34 mg of *R*-**29** in 8% yield and 92:8 er.

**Note 9:** When *rac*-**18** was lithiated in the absence of TMEDA at  $-60\text{ }^{\circ}\text{C}$  for 3 h in  $\text{Et}_2\text{O}$ , then arylated as described above, we obtained 51 mg of *rac*-**29** in 12% yield.

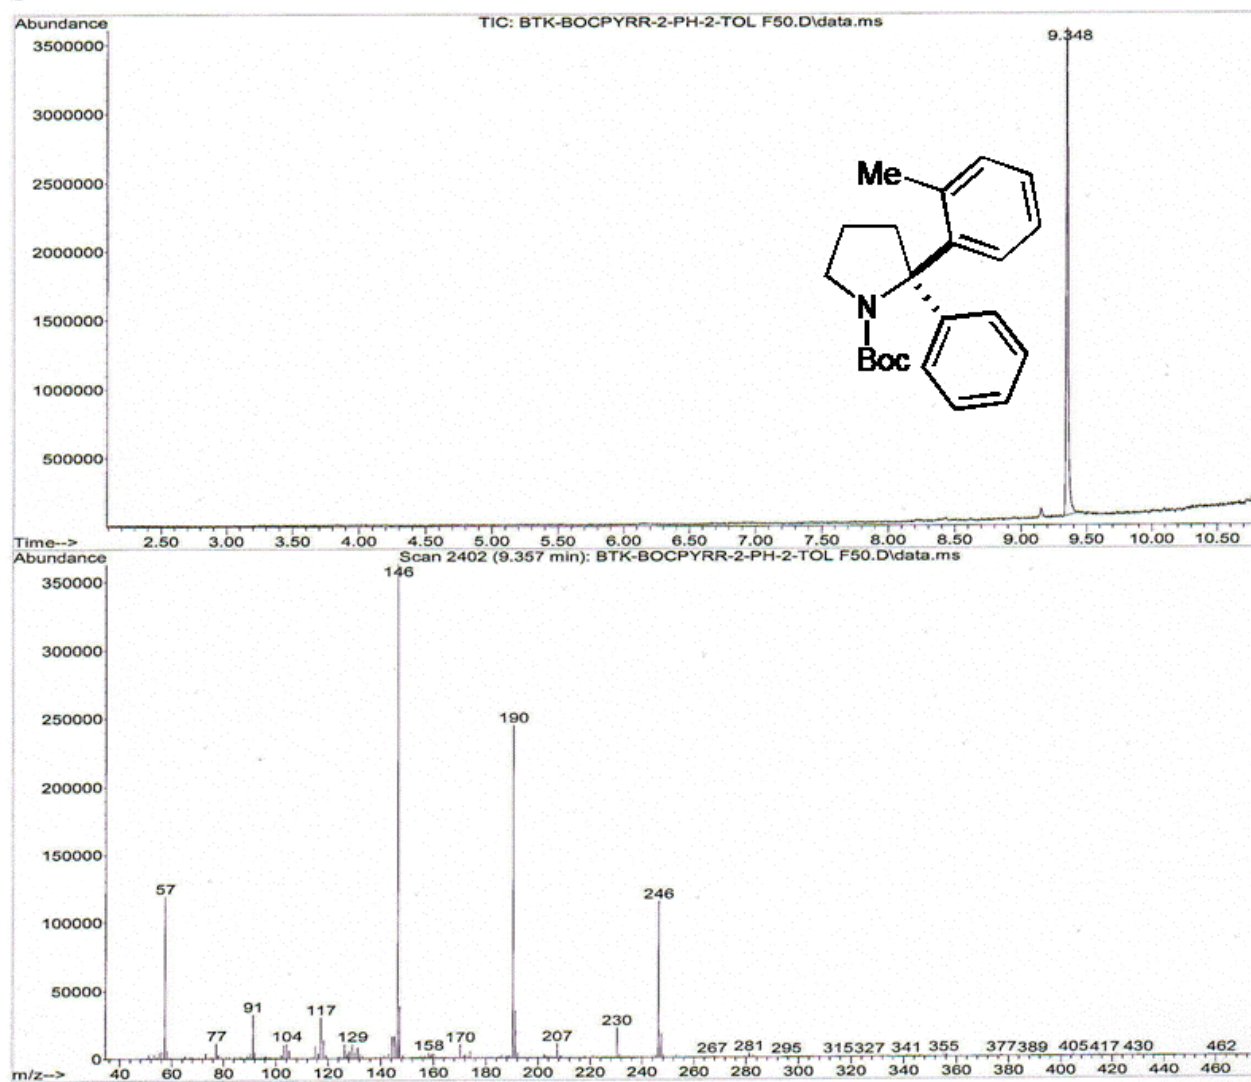

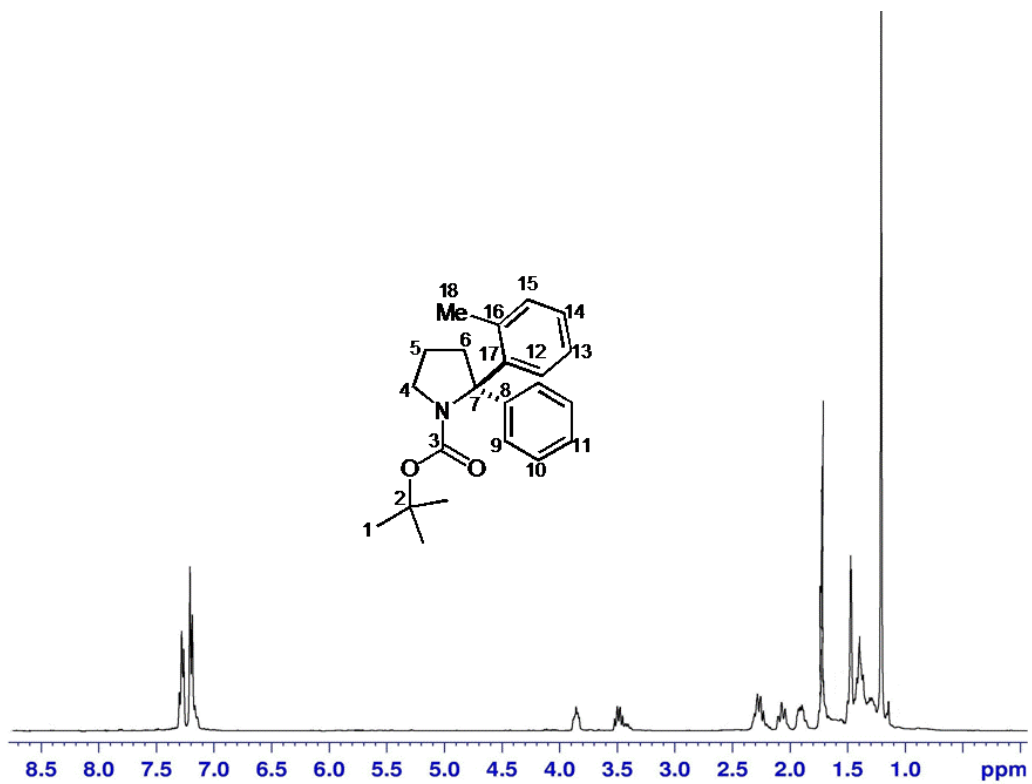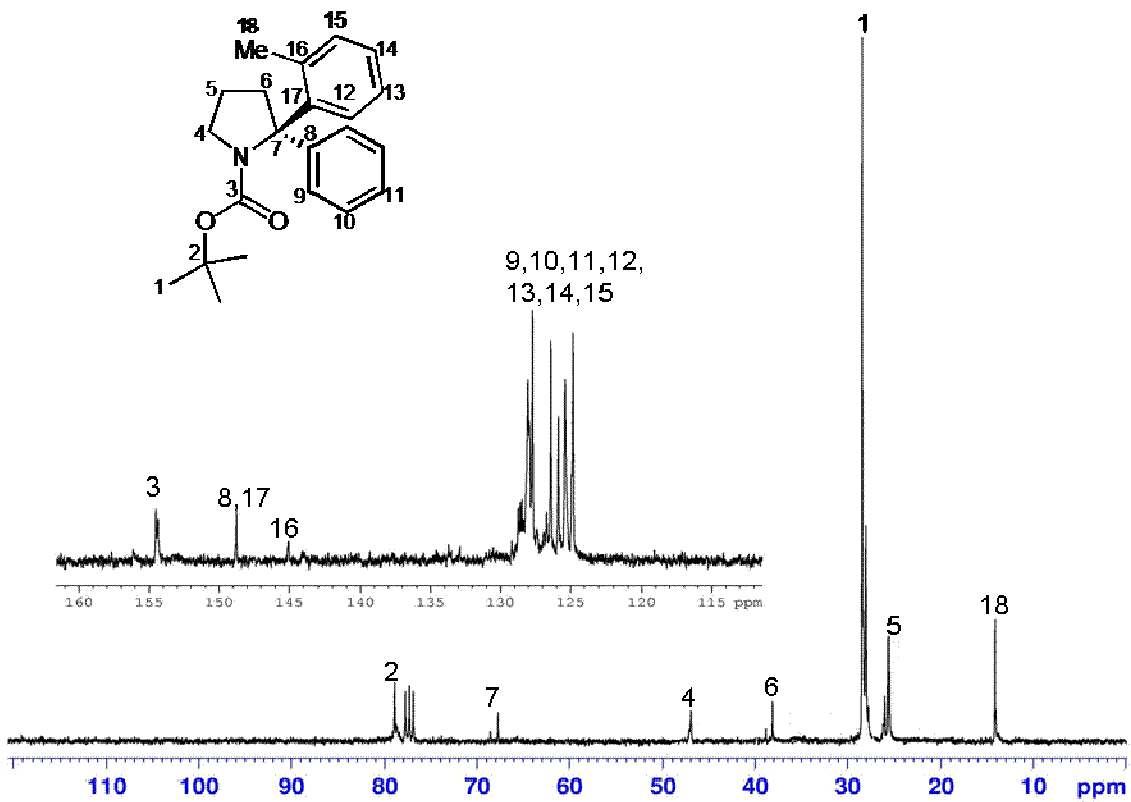

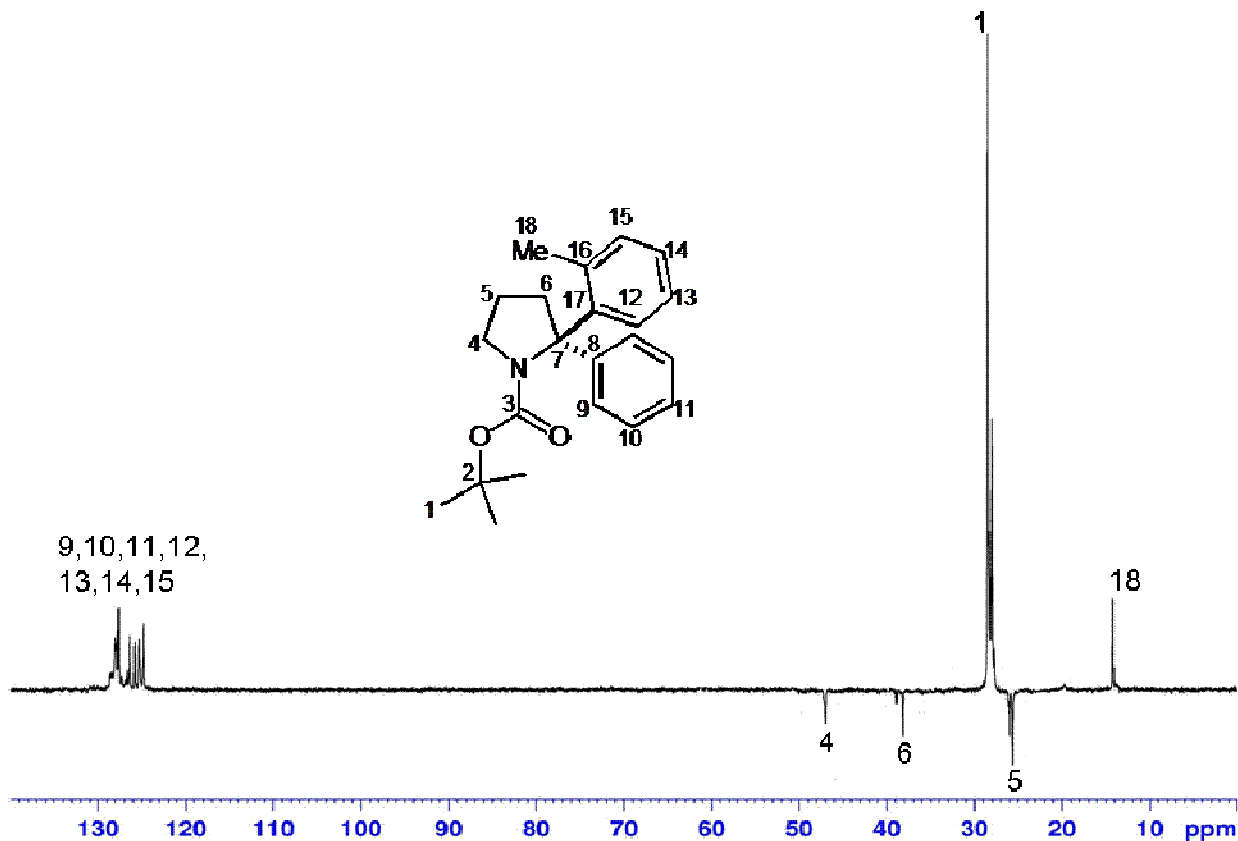

## 8. Lithiation-substitution of other *N*-Boc-2-arylpyrrolidines

### 8.1. Lithiation-substitution of (*R*)-*N*-Boc-2-(*o*-toluyl)pyrrolidine with MeOD

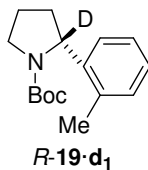

Using **General Procedure G**, *R*-**19** of 90:10 er and 0.1 mL MeOD showed complete deuteration after 3 h and *R*-**19**-*d*<sub>1</sub> was obtained with no loss of er. There is a noticeable shift of the protonated base peak from *m/z* 206 for **19** to *m/z* 207 for *R*-**19**-*d*<sub>1</sub>.

Pirkle-Whelk-0-1; Flow = 1.0, Modifier % = 5% MeOH

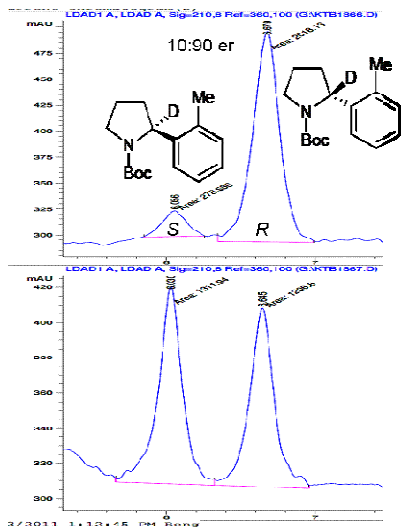

## 8.2. Lithiation-substitution of (R)-N-Boc-2-(2-pyridyl)pyrrolidine with MeOD

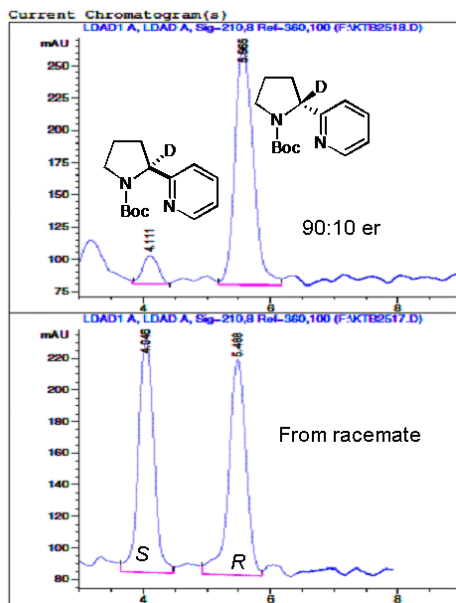



### GC-MS traces from electron impact ionization

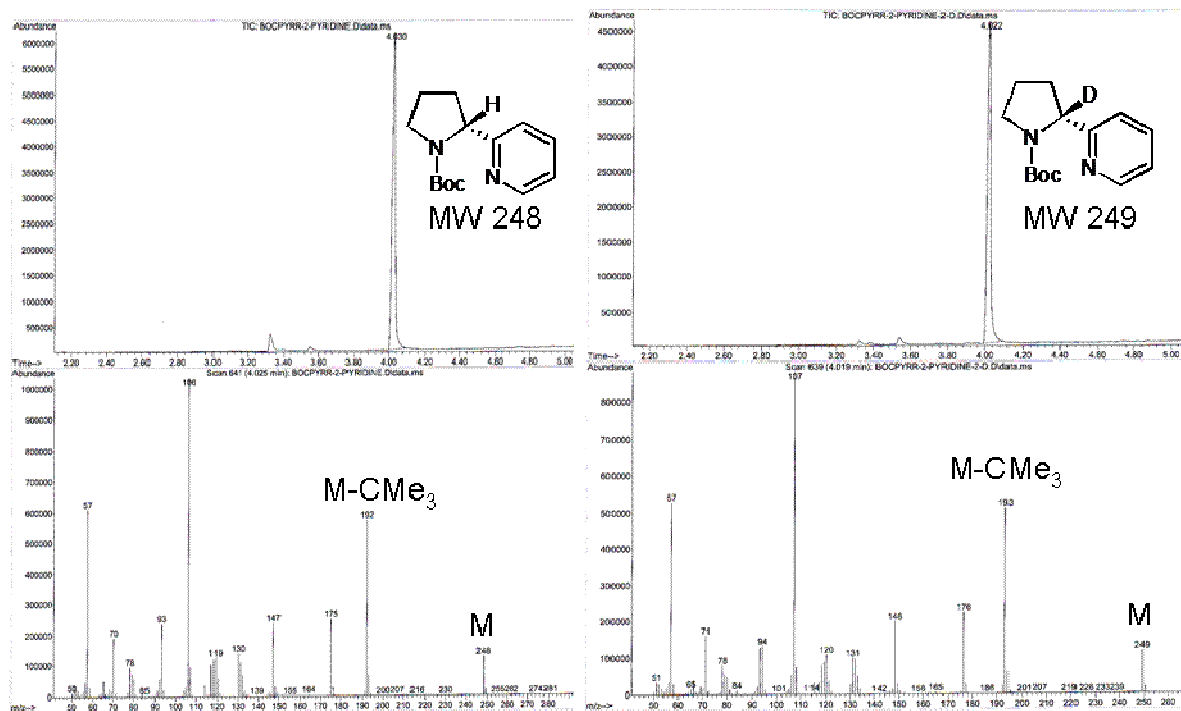

### 8.3. Lithiation-substitution of (*R*)-*N*-Boc-2-(1-naphthyl)pyrrolidine, **21**

#### a) With MeOD

Using **General Procedure G**, *R*-**21** of 95:5 er and 0.1 mL MeOD showed complete deuteration after 3 h and *R*-**21**·**d**<sub>1</sub> was obtained with no loss of er. There is a noticeable shift of the protonated base peak from *m/z* 297 for **21** to *m/z* 298 for *R*-**21**·**d**<sub>1</sub>.

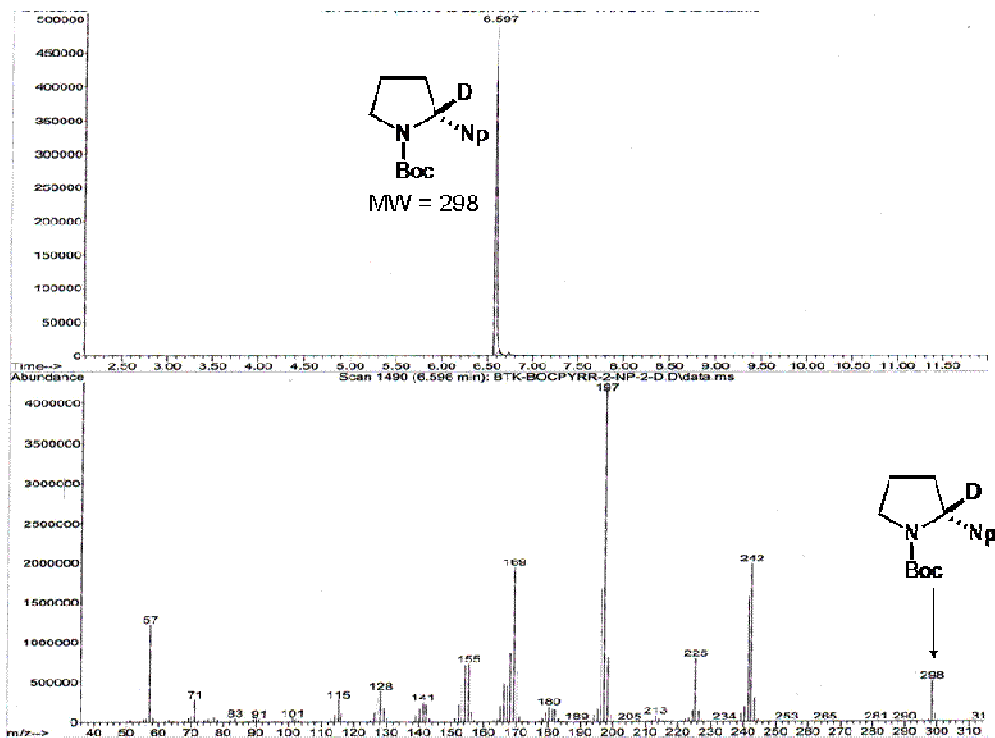

LDAD1 A, LDAD A, Sig=210,8 Ref=360,100 (F:\V

Flow = 2.0, Mod % = 5.0% MeOH

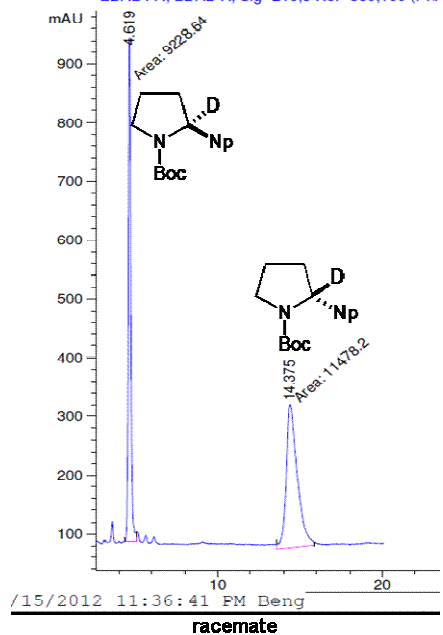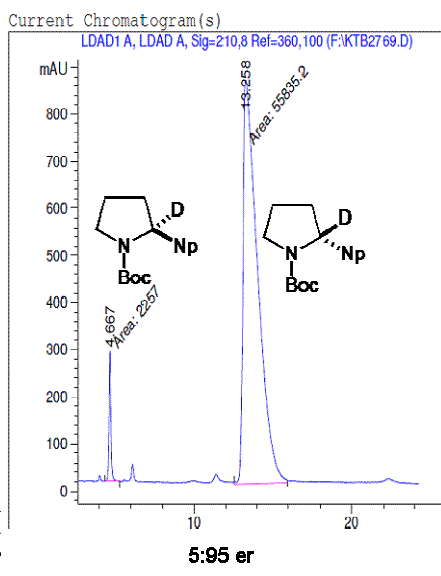

b) With Me<sub>2</sub>SO<sub>4</sub>

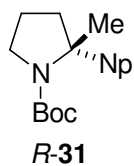

Using **General Procedure H**, *R*-**21** of 95:5 er (311 mg, 1.0 mmol), TMEDA (0.15 mL, 1.0 mmol, 1.0 equiv), Et<sub>2</sub>O (10 mL), *n*-BuLi (0.5 mL, 1.0 mmol, 2.0 M, 1.0 equiv), Me<sub>2</sub>SO<sub>4</sub> (0.15 mL, 1.5 mmol, 1.5 equiv) for 8 h at -80 °C prior to addition of 2 mL MeOH, gave the crude product as an oil. Purification by silica gel chromatography eluting with hexane-EtOAc (80:20) afforded 291 mg of *R*-**31** as an oil in 90% yield and 95:5 er. <sup>1</sup>H NMR (mixture of rotomers) (300 MHz, CDCl<sub>3</sub>) δ = 8.23–7.37 (6H, m), 3.92 (1H, m), 3.56 (1H, m), 2.78 (1H, m), 2.29–1.82 (6H, m), 1.58 – 1.35 and 0.78 (9H, s) <sup>13</sup>C NMR (75.5 MHz, CDCl<sub>3</sub>) δ = 155.4 (C=O), 142.1 (C), 134.0 (C) 131.5 (C), 128.9 (CH), 127.3 (CH), 125.8 (CH), 125.4 (CH), 124.9 (CH), 123.5 (CH), 123.2 (CH) 79.5, 67.4 (C), 47.1 (CH<sub>2</sub>), 41.5 (CH<sub>2</sub>), 28.8 (CH<sub>3</sub>), 28.3 (3 x CH<sub>3</sub>), 22.3 (CH<sub>2</sub>). The enantiomer ratio was evaluated by CSP-SFC, monitoring at 210 nm, by comparison with an authentic racemic sample, under the following column conditions: **Column:** Pirkle Whelk-O-1, **Flow Rate** = 0.5 mL/min, **Polarity Modifier** = 10.0% MeOH.

Operator : Beng  
 Instrument : Instrument #1  
 Acquired : 6 Feb 2012 21:04  
 Sample Name: BocPyrr-2-Np-2-Me  
 Misc Info : starting material

using AcqMethod ALH-EI-1.M

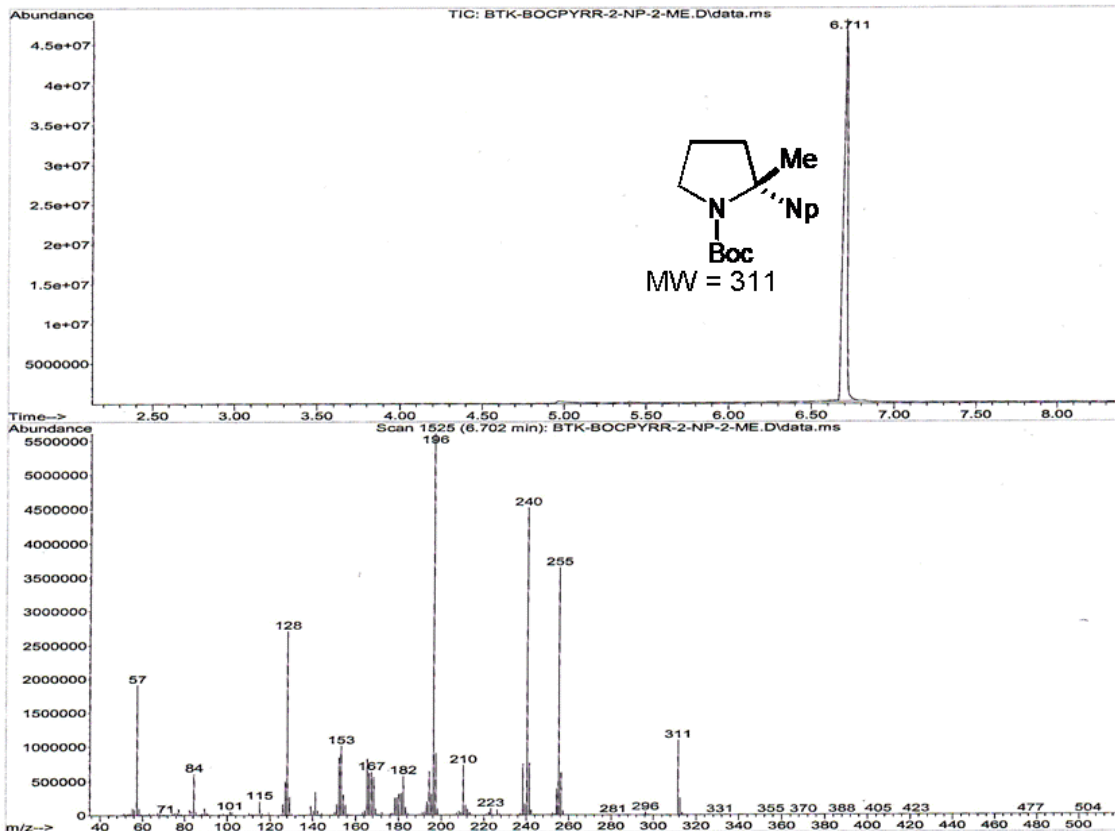

CSP-SFC trace; Column: Pirke Wheelk-0-1, flow rate= 0.5, modifier = 10% MeOH

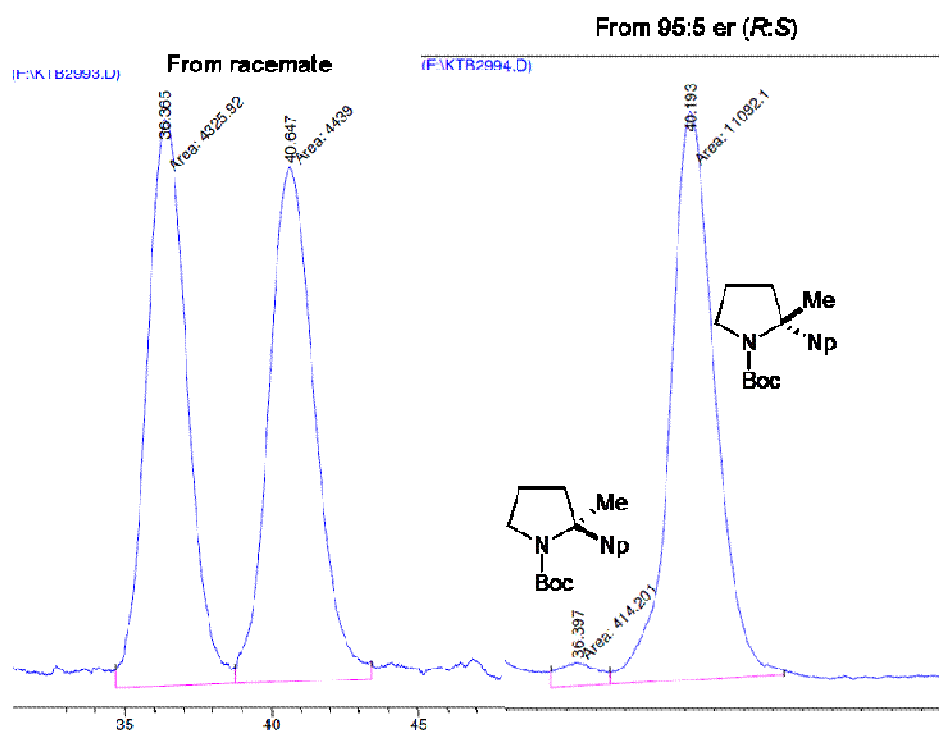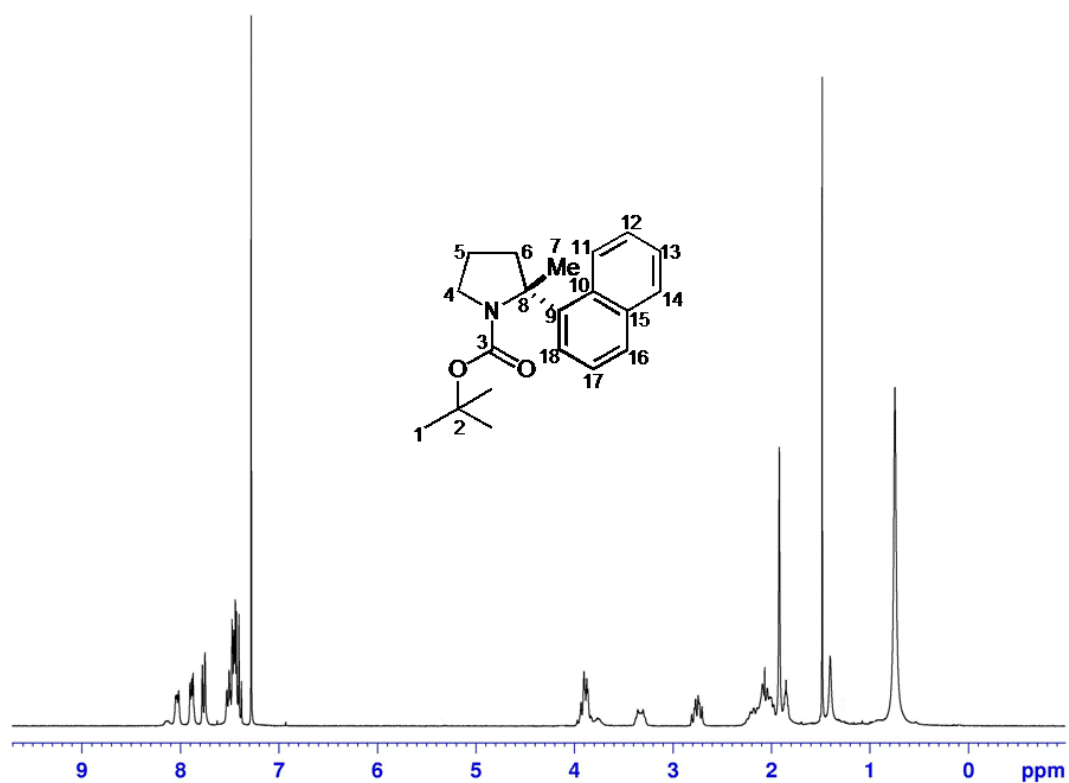

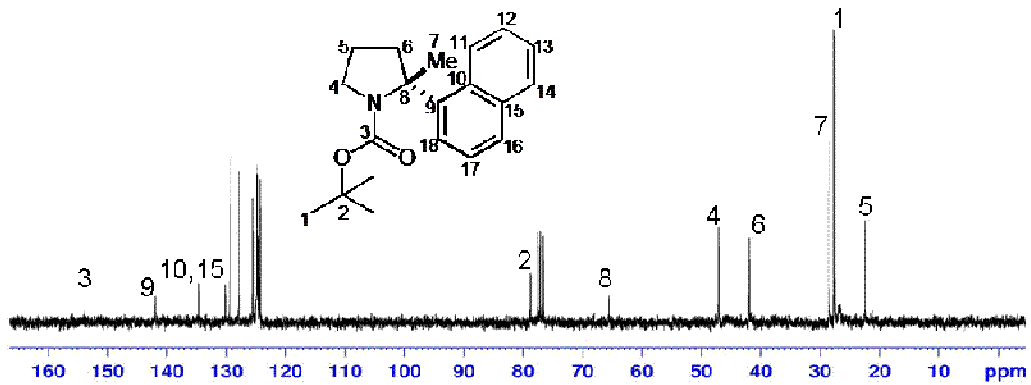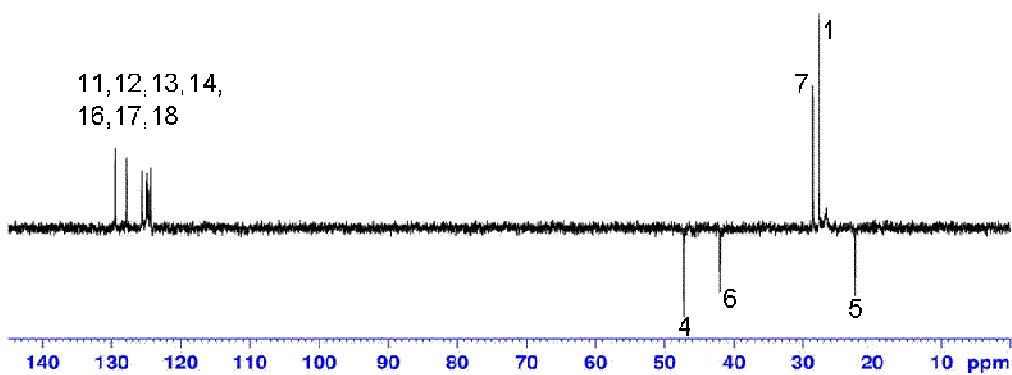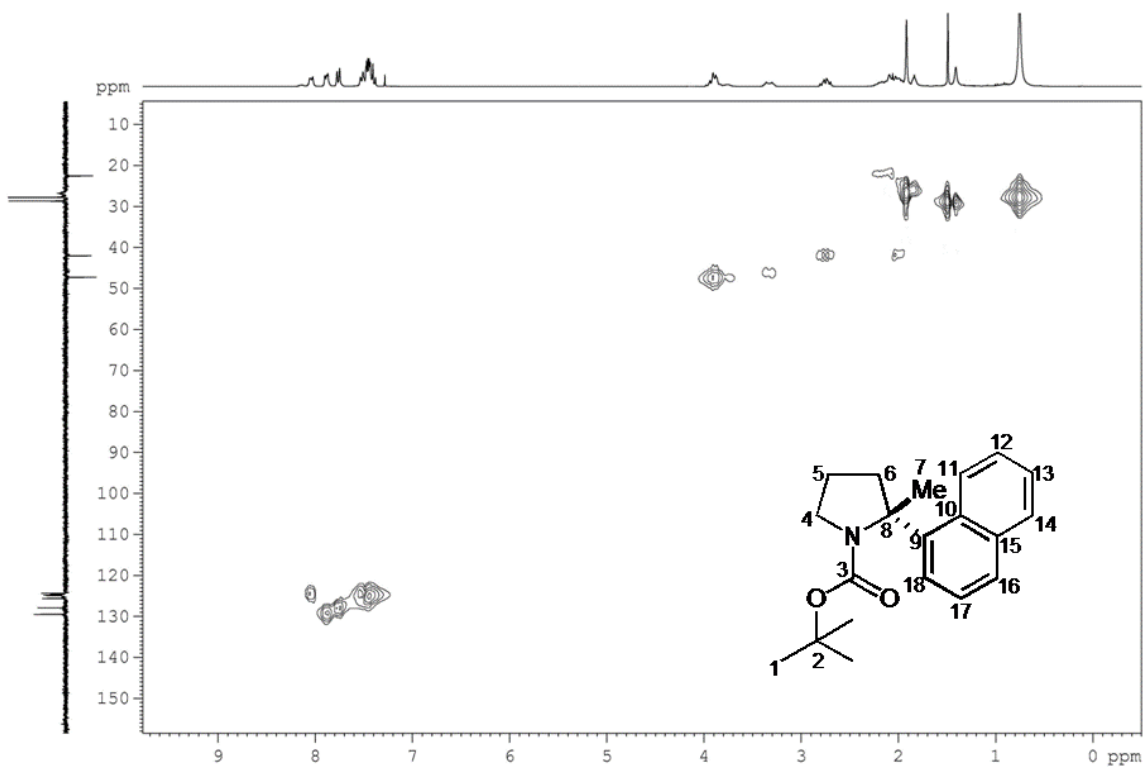

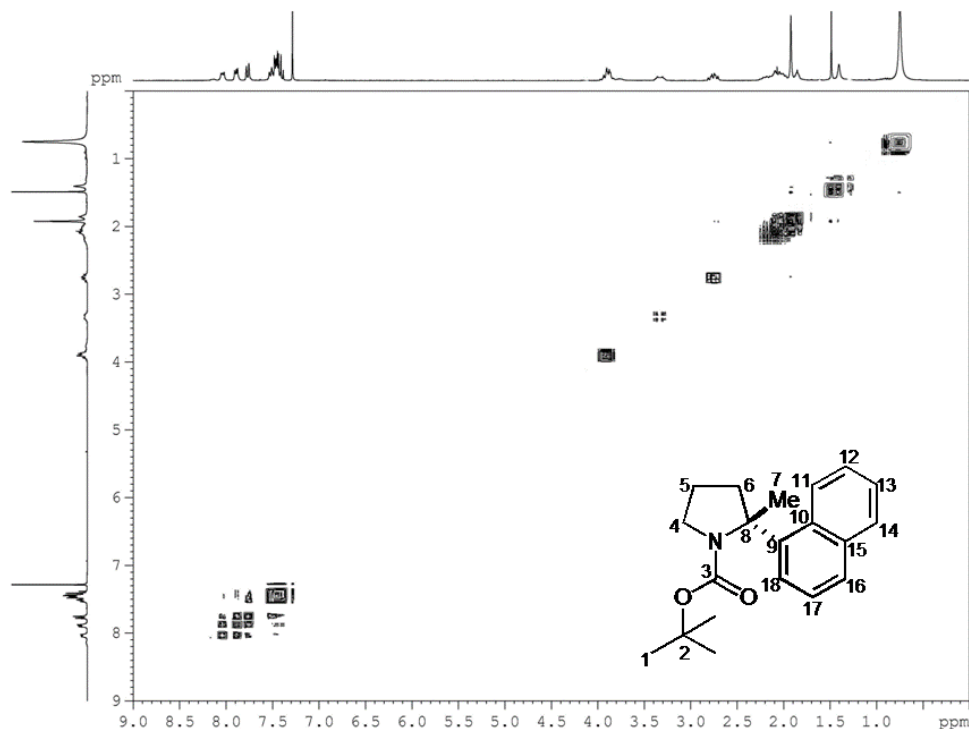

**c) With bromobenzene:**

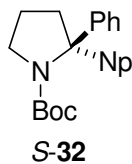

To an oven-dried, septum-capped round bottom flask equipped with a stir bar, was added *R*-**21** of 95:5 er (75 mg, 0.25 mmol, 1.0 equiv) in Et<sub>2</sub>O (2 mL) under argon. The mixture was cooled to –60 °C and a solution of *n*-BuLi in hexanes (0.1 mL, 0.25 mmol, 2.5 M, 1.0 equiv) was added slowly. After 3 h at this temperature, a solution of ZnCl<sub>2</sub> (0.15 mL, 1.0 M solution in Et<sub>2</sub>O, 0.6 equiv), was added slowly over a two minute period and the mixture was stirred for 30 minutes followed by warming to room temperature. After 30 minutes, Pd(OAc)<sub>2</sub> (2.5 mg, 4 mol%), *t*-Bu<sub>3</sub>P·HBF<sub>4</sub> (6 mg, 8 mol%) and phenyl bromide (0.033 mL, 0.28 mmol, 1.1 equiv) were added sequentially. After stirring for 48 h at 40 °C, NH<sub>4</sub>OH (2 mL, 10% aqueous solution) was added dropwise and the mixture was stirred for 30 minutes. The resulting slurry was filtered through Celite and rinsed with 5 mL Et<sub>2</sub>O. The filtrate was washed with 1 M HCl<sub>(aq)</sub> (10 mL), then with water (2 x 5 mL), dried over Na<sub>2</sub>SO<sub>4</sub> and evaporated under reduced pressure to obtain the crude

product. Analysis of the crude product by CG-MS showed complete conversion of **21** but less than 5% yield of **32** was present.

**Enamine byproduct formed during Pd-catalyzed arylation of Boc-Pyrr-2-Np with phenyl bromide:**

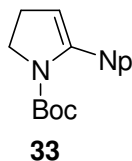

$^1\text{H}$  NMR (mixture of rotomers) (300 MHz,  $\text{CDCl}_3$ )  $\delta$  = 8.23–7.37 (6H, m), 5.23 (1H, t, br), 4.26 (2H, t, br), 2.81 (2H, t, br), 1.01 – 0.61 (9H, s, br)  $^{13}\text{C}$  NMR (75.5 MHz,  $\text{CDCl}_3$ )  $\delta$  = 155.4 (C=O), 142.1 (C), 141.8 (C), 134.0 (C) 131.5 (C), 128.9 (CH), 127.3 (CH), 125.8 (CH), 125.4 (CH), 124.9 (CH), 123.5 (CH), 123.2 (CH) 112.2 (CH), 79.8, 48.2 ( $\text{CH}_2$ ), 28.8 ( $\text{CH}_2$ ), 28.3 (3 x  $\text{CH}_3$ ).

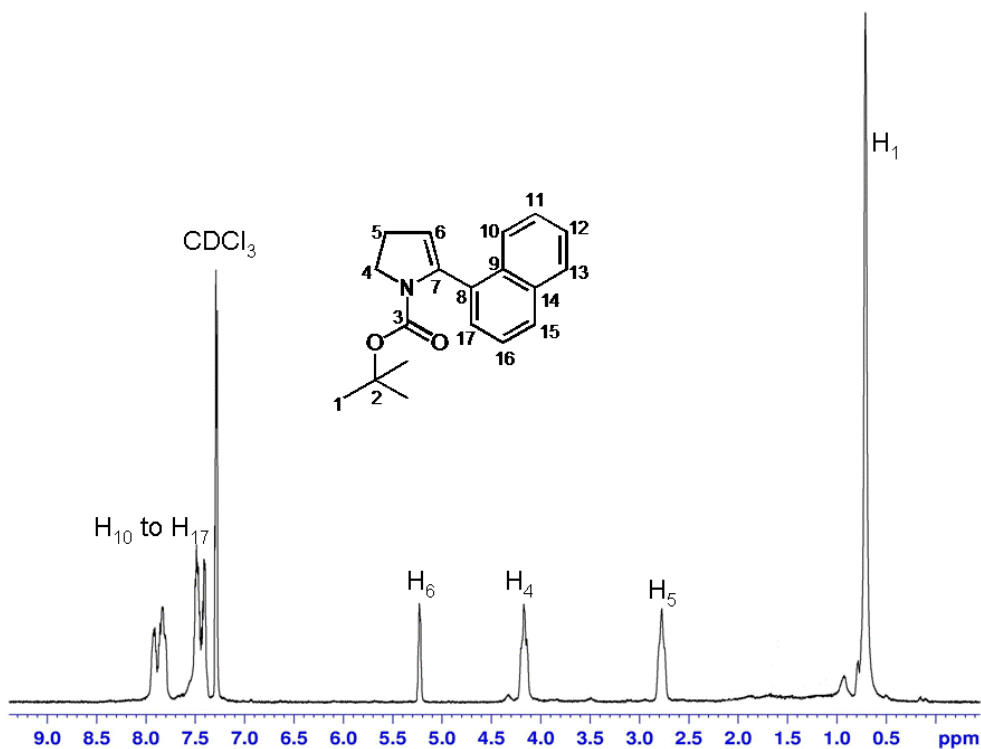

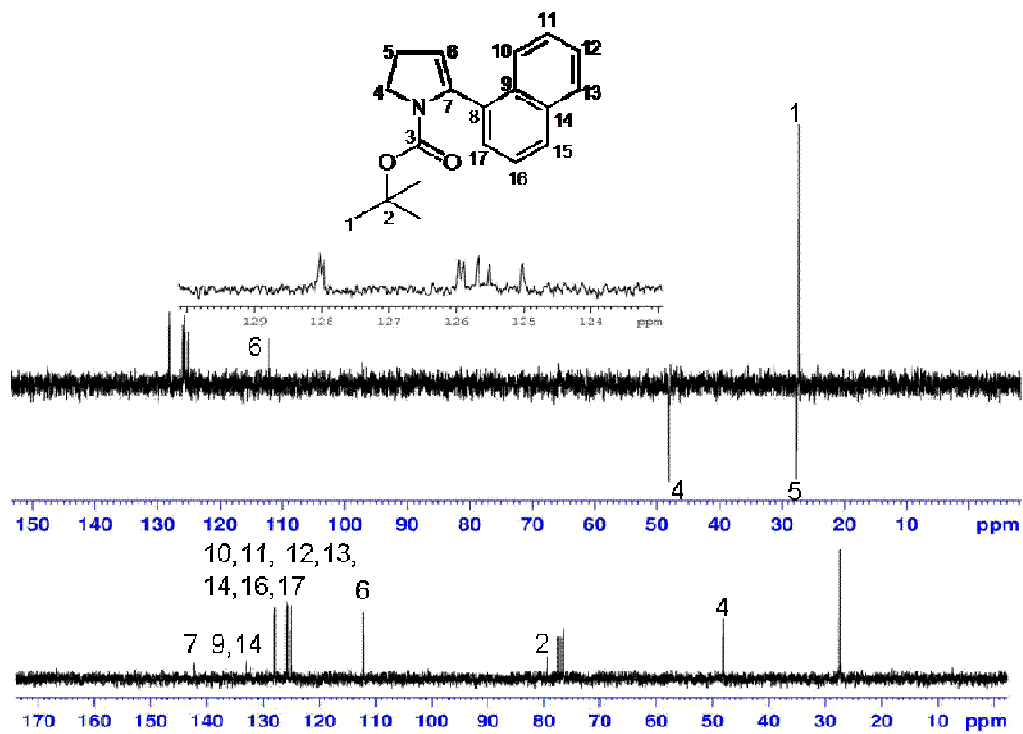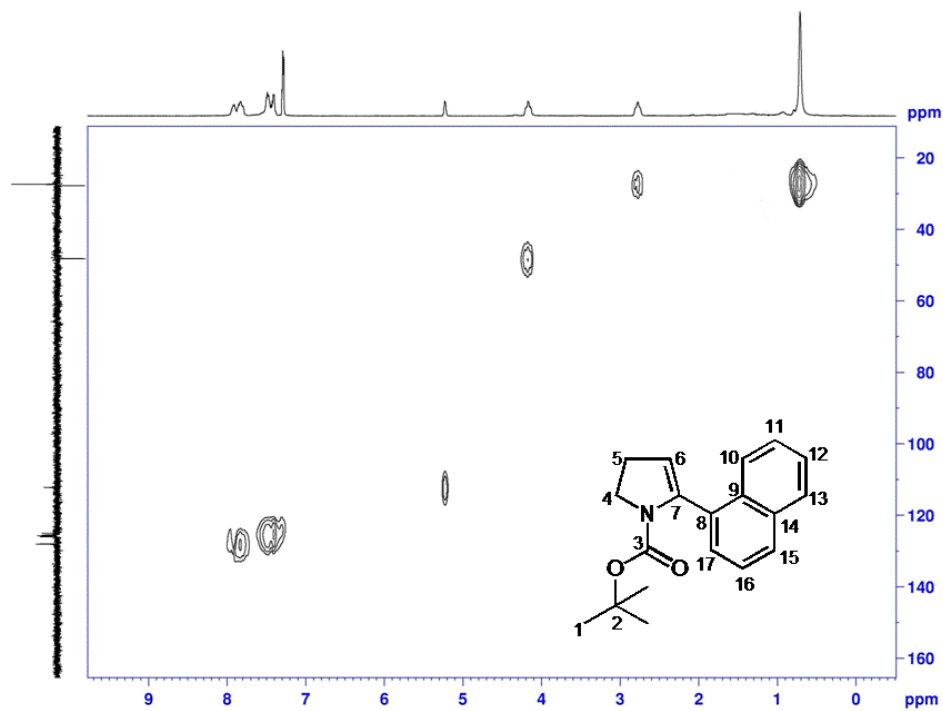



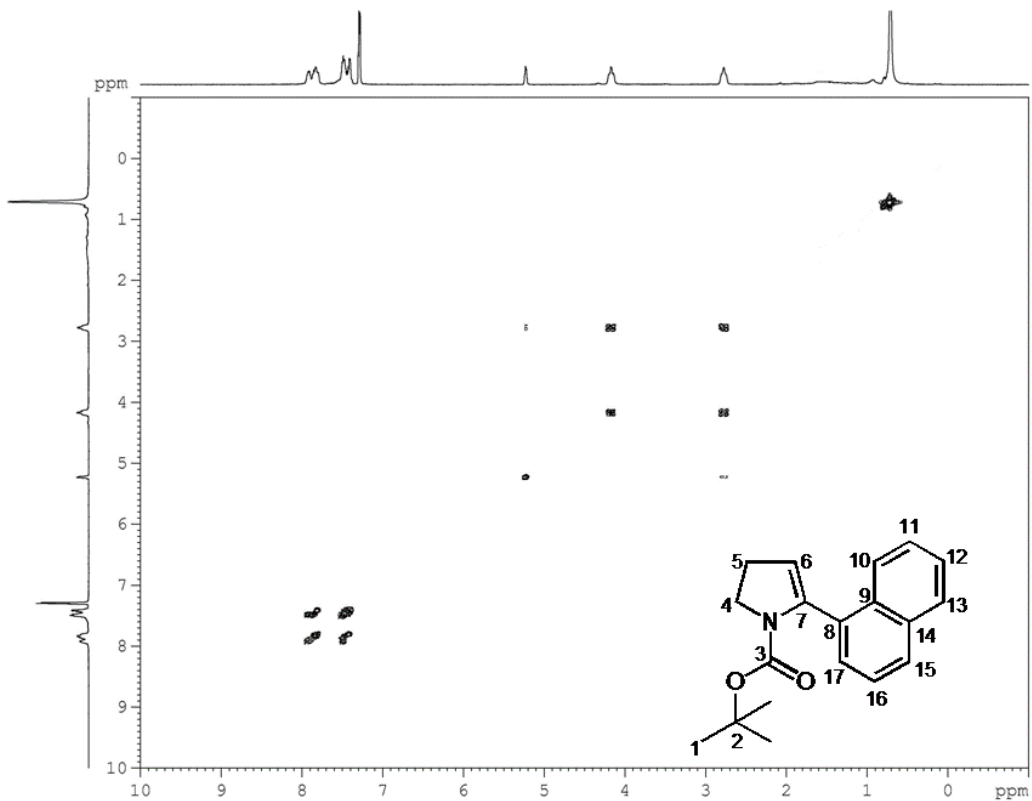

#### 8.4. Lithiation-substitution of (*S*)-*N*-Boc-2-(4-cyanophenyl)pyrrolidine with MeOD

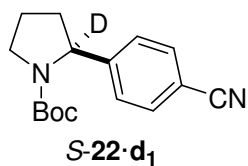

Pirde-Wheik-D-1; Flow = 1.0, Modifier % = 3% MeOH

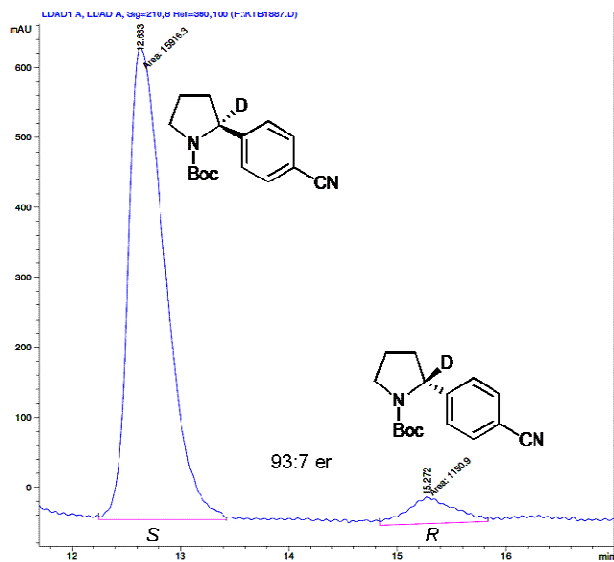

GC-MS traces from electron impact ionization

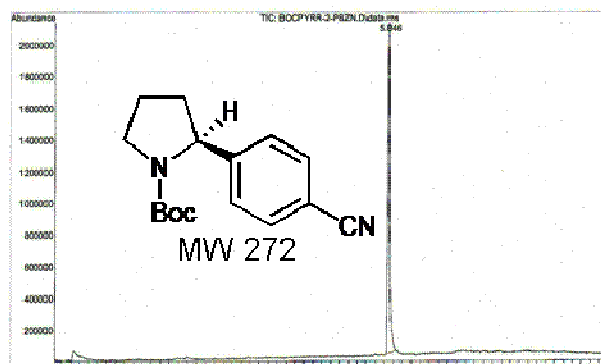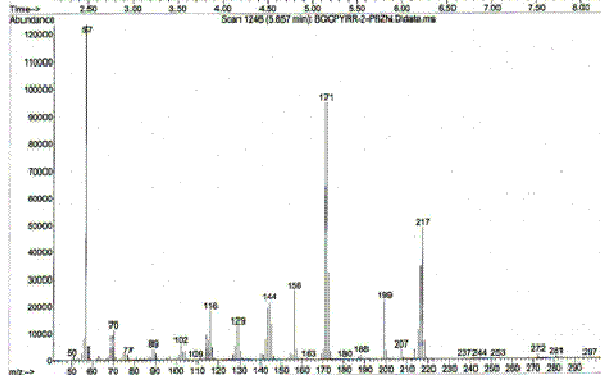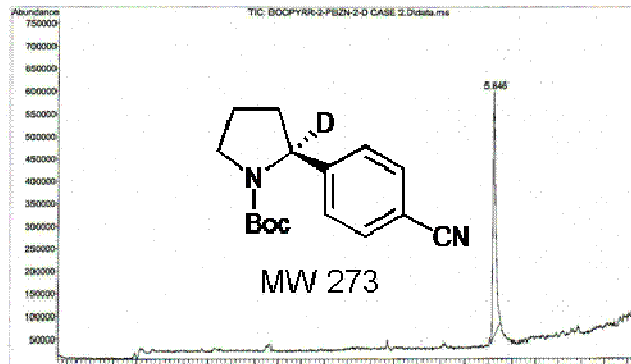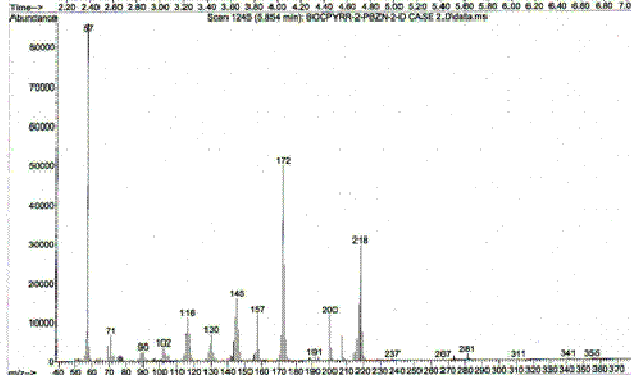

## 9. Dynamics of Inversion of **24**

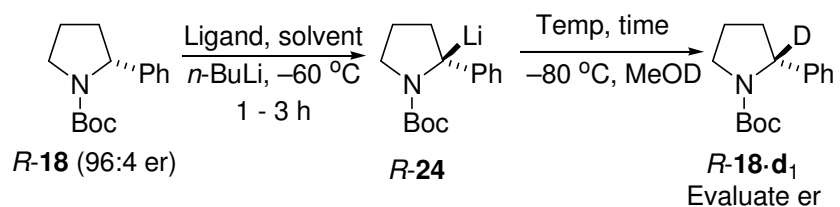

### Typical kinetic run:

In oven-dried, septum-capped tubes equipped with a stir bar, **R-18** (0.06 M in ether, 0.5 mL) and 0.06 M TMEDA (0.00 or 1.00 equiv) were treated with *n*-BuLi (1.0 equiv) at  $-60\text{ }^\circ\text{C}$  for 3 h under nitrogen. The total volume of each tube was maintained at 1.0 mL. The tubes were quickly transferred to a second bath thermostatted at the desired temperature (see tables below). At various time intervals over a four-hour period, a tube was transferred to a bath at  $-80\text{ }^\circ\text{C}$  and rapidly quenched with MeOD. Each tube was analyzed by GC-MS to ensure 100% deuterium incorporation (indicative of complete lithiation). The enantiomer ratio (er) of **18** $\cdot\text{d}_1$  was determined by CSP-SFC monitoring at 210 nm under the following column conditions: **Column:** Pirkle Whelk-O-1, **Flow Rate** = 2.0 mL/min, **Polarity Modifier** = 2.0% EtOH. **S-18** $\cdot\text{d}_1$  elutes after  $\sim 4.2$  min and **R-18** $\cdot\text{d}_1$  elutes after  $\sim 5.7$  min. The rate constants were determined by non-linear fitting of the zero-order plots using reversible first-order kinetics. Using reversible first-order kinetics, the fraction of the *R*-enantiomer starting from **R-18** (96:4 er) as a function of time (*t*), is given by  $(R)_t = 0.5 + (0.96 - 0.50)(e^{-k_{\text{rac}}t})$  where  $k_{\text{rac}}$  is the observed rate constant for the racemization. The enantiomerization rate constant,  $k_{\text{ent}} = k_{\text{rac}}/2$ .

### Notes

- In  $\text{Et}_2\text{O}$ , the lithiation of **R-18** (96:4 er) was carried out for 3 h both in the absence of any ligand and in the presence of TMEDA or **23**.
- In THF, the lithiation of **S-18** (96:4 er) was carried out for 1 h in the absence of any ligand.
- In 2-MeTHF, the lithiation of **R-18** (96:4 er) was carried out for 1 h in the absence of any ligand.

**Table S1.** Enantiomer ratios for racemization of **24** in the absence of any ligand in Et<sub>2</sub>O

| a) at -20 °C |            | c) at 0 °C |            |
|--------------|------------|------------|------------|
| Time (h)     | Fraction R | Time (h)   | Fraction R |
| 0            | 0.960      | 0          | 0.960      |
| 0.5          | 0.915      | 0.1667     | 0.805      |
| 2.5          | 0.823      | 0.5        | 0.633      |
| 4.5          | 0.753      | 0.75       | 0.585      |
|              |            | 1          | 0.539      |

| b) at -7 °C |            | d) at 8 °C |            |
|-------------|------------|------------|------------|
| Time (h)    | Fraction R | Time (h)   | Fraction R |
| 0           | 0.960      | 0          | 0.960      |
| 0.25        | 0.858      | 0.083333   | 0.824      |
| 0.5         | 0.757      | 0.25       | 0.627      |
| 1           | 0.645      | 0.5        | 0.539      |
| 2           | 0.541      | 0.75       | 0.501      |

**Figure S1.** Evolution of er in the enantiomerization of *R*-**24** in the absence of any ligand in Et<sub>2</sub>O.

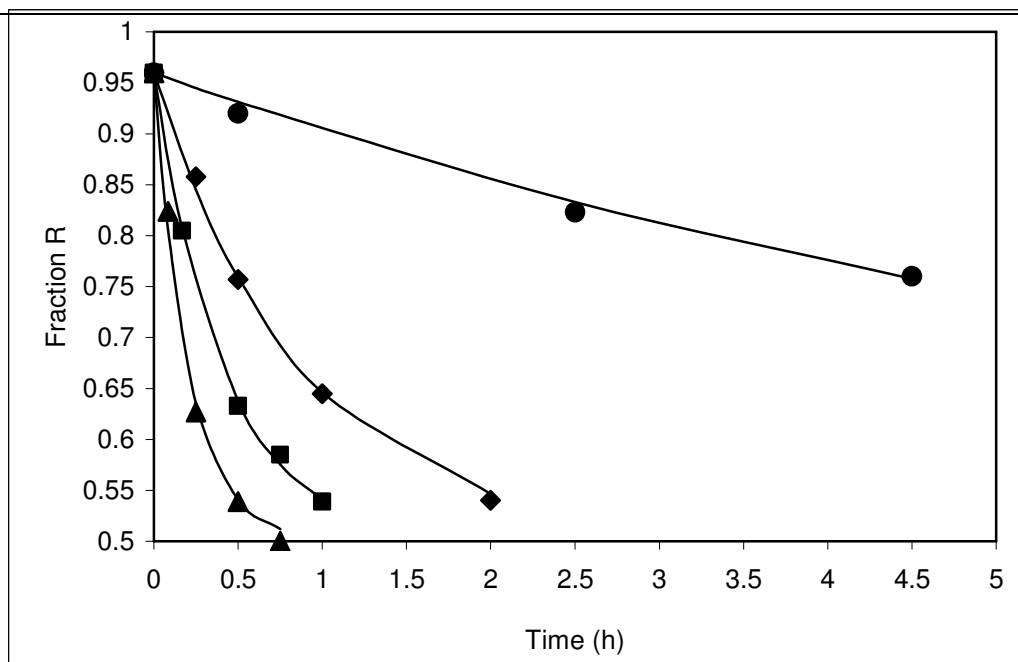

**KEY:** 281 K; triangles, 273 K; squares, 266 K; diamonds, 253 K; circles

**Enantiomerization in the absence of any ligand at 281 K in Et<sub>2</sub>O**

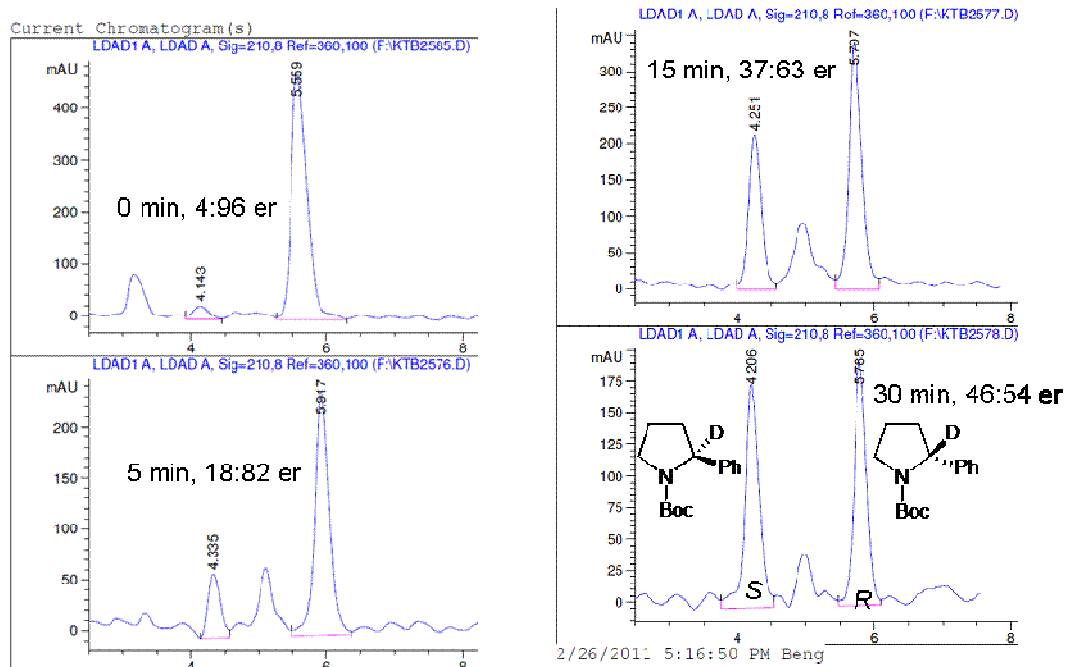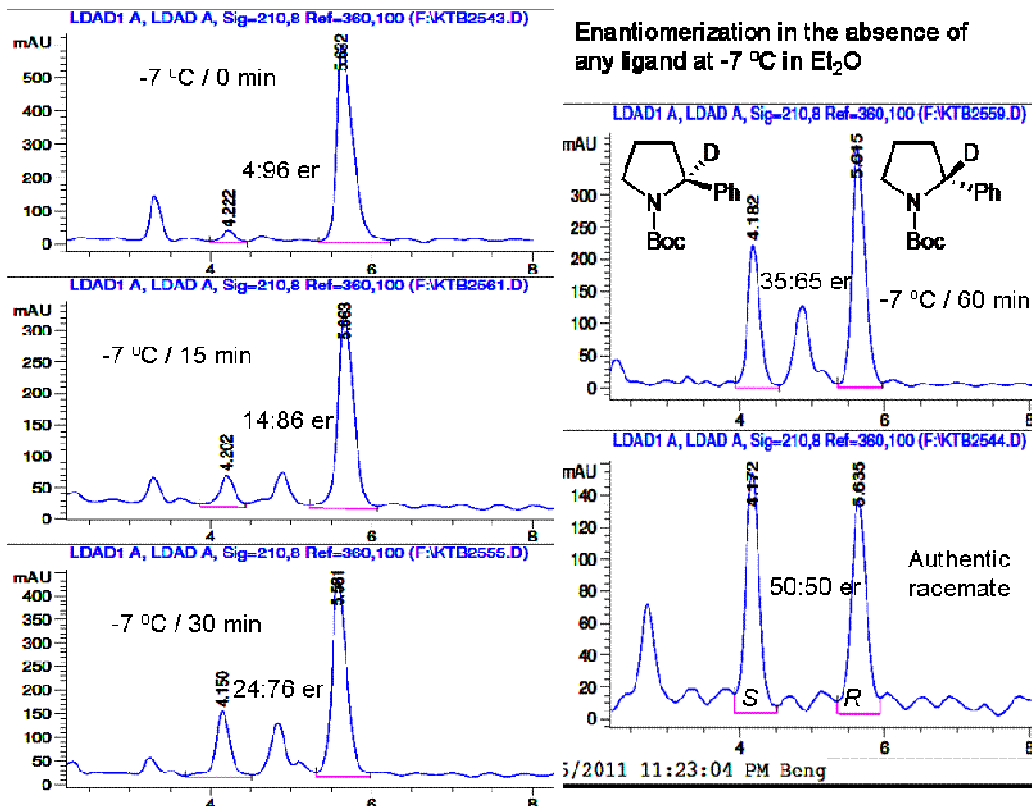

**Table S2.** Enantiomer ratios for enantiomerization of **24** in the presence of 1 equiv TMEDA in Et<sub>2</sub>O

| a) at -7 °C |            | c) at 8 °C |            |
|-------------|------------|------------|------------|
| Time (h)    | Fraction R | Time (h)   | Fraction R |
| 0           | 0.960      | 0          | 0.960      |
| 0.5         | 0.919      | 0.25       | 0.8095     |
| 1           | 0.875      | 0.5        | 0.7305     |
| 1.5         | 0.828      | 1.25       | 0.597      |
| 2.5         | 0.784      | 2          | 0.551      |
| 3.5         | 0.752      |            |            |

  

| b) at 0 °C |            | d) at 18 °C |            |
|------------|------------|-------------|------------|
| Time (h)   | Fraction R | Time (min)  | Fraction R |
| 0          | 0.96       | 0           | 0.96       |
| 0.1667     | 0.93       | 5           | 0.888      |
| 0.5        | 0.861      | 10          | 0.77       |
| 0.75       | 0.82       | 20          | 0.67       |
| 1          | 0.789      | 30          | 0.627      |
|            |            | 40          | 0.592      |

**Figure S2.** Evolution of er in the enantiomerization of *R*-**24** in the presence of 1 equiv TMEDA in Et<sub>2</sub>O at various temperatures.

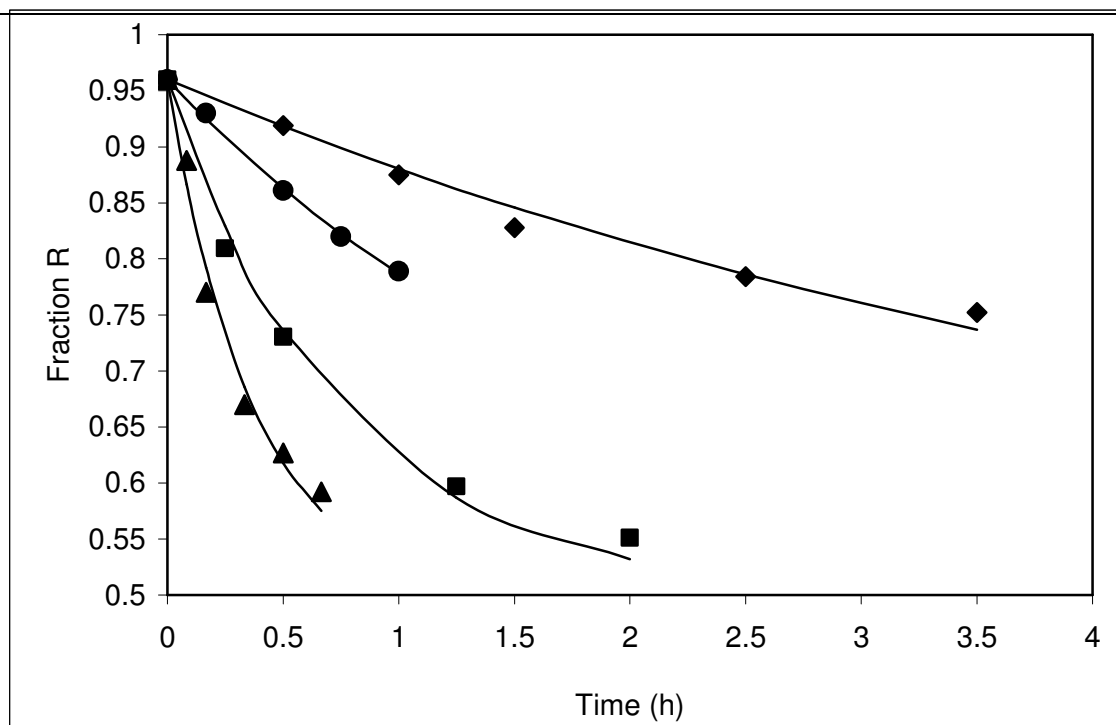

**KEY:** 291 K; triangles, 281 K; squares, 273 K; circles, 266 K; diamonds

**Enantiomerization in the presence  
of 1 equiv TMEDA at 291 K in Et<sub>2</sub>O**

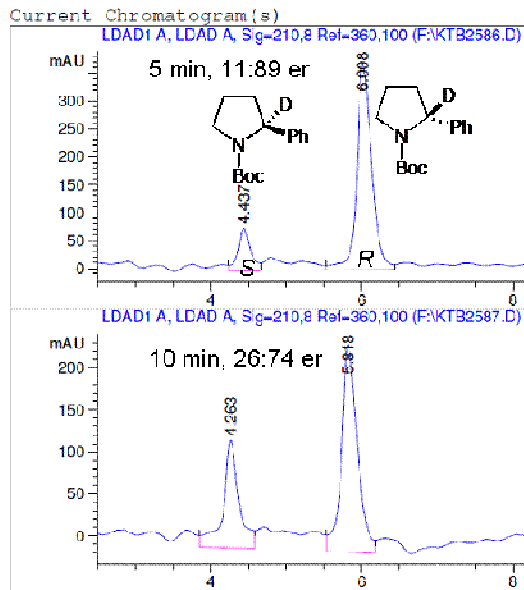

**Enantiomerization in the presence  
of 1 equiv TMEDA at 281 K in Et<sub>2</sub>O**

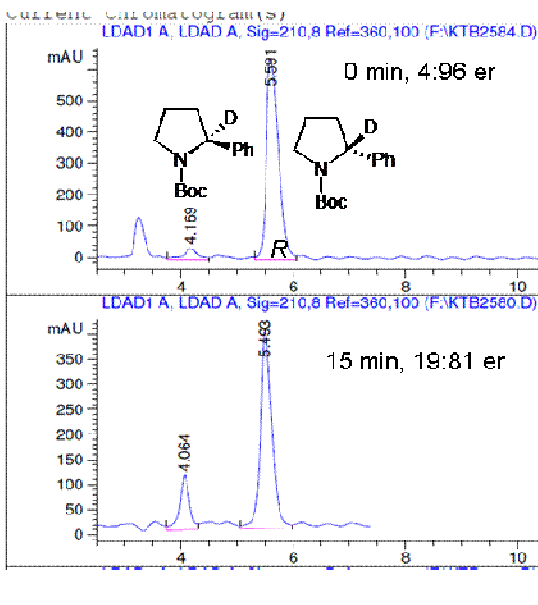

**Table S3.** Enantiomer ratios for enantiomerization of **24** in the presence of 1 equiv DIB, **23**, in Et<sub>2</sub>O

a) at -2 °C

| Time (h) | Fraction <i>S</i> |
|----------|-------------------|
| 0        | 0.96              |
| 0.1667   | 0.945             |
| 0.5      | 0.922             |
| 1        | 0.893             |

b) at 8 °C

| Time (h) | Fraction <i>S</i> |
|----------|-------------------|
| 0        | 0.953             |
| 0.08333  | 0.913             |
| 0.25     | 0.872             |
| 0.5      | 0.84              |
| 0.75     | 0.77              |

c) at 14 °C

| Time (min) | Fraction <i>S</i> |
|------------|-------------------|
| 0          | 0.96              |
| 0.08333    | 0.875             |
| 0.25       | 0.784             |
| 0.5        | 0.724             |
| 0.75       | 0.643             |
| 1.25       | 0.543             |

Evolution of er in the enantiomerization of *R*-**24** in the presence of 1 equiv DIB in Et<sub>2</sub>O at various temperatures.

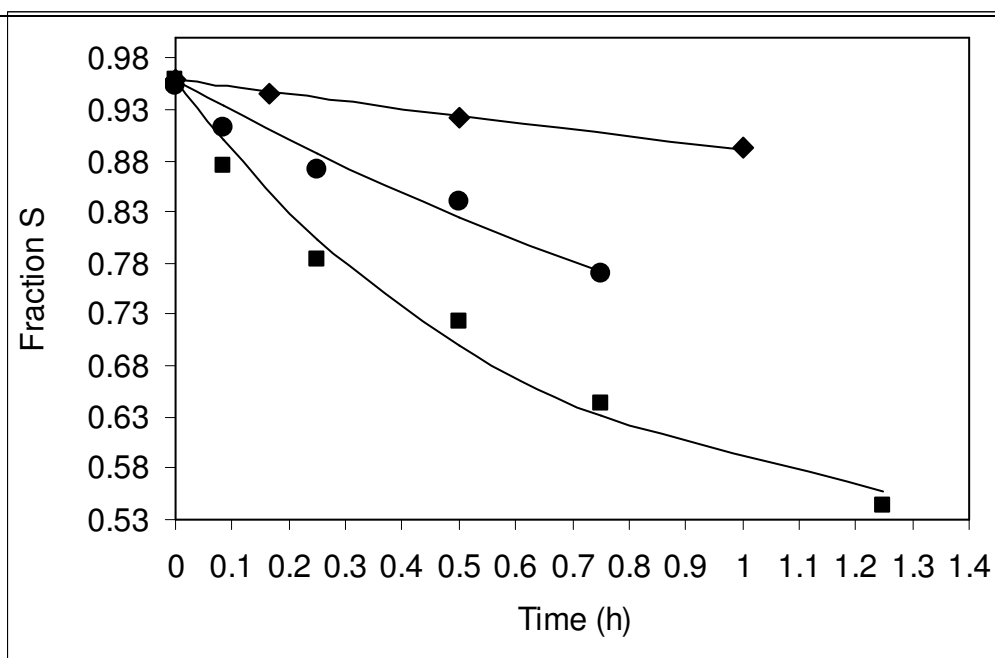

**KEY:** 287 K; squares, 281 K; circles, 271 K; diamonds



**Enantiomerization in the presence of 1 equiv DIB at 287 K in Et<sub>2</sub>O**  
 CSP-SFC conditions: Flow rate = 0.5, Mod % = 10

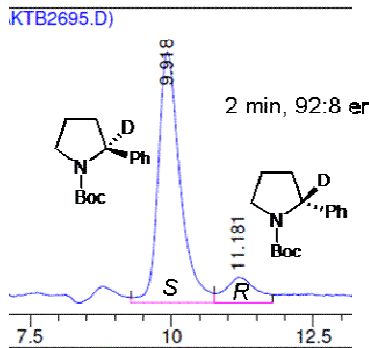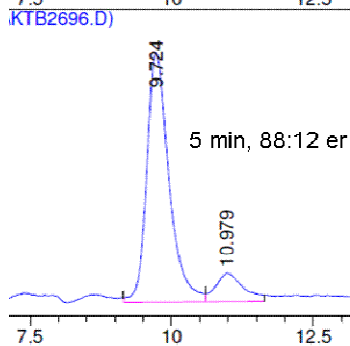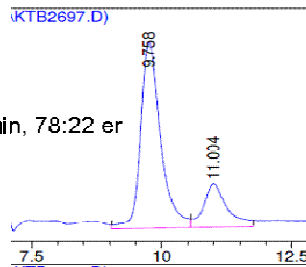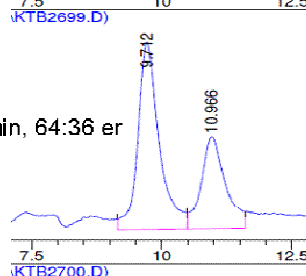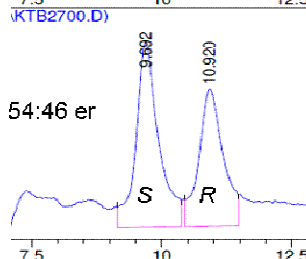

**Enantiomerization in the presence of 1 equiv DIB at 281 K in Et<sub>2</sub>O**  
 CSP-SFC conditions: Flow rate = 0.5, Mod % = 10

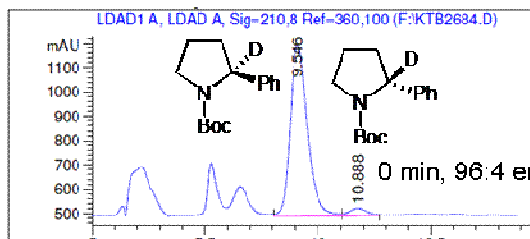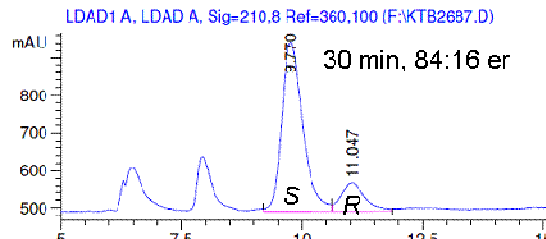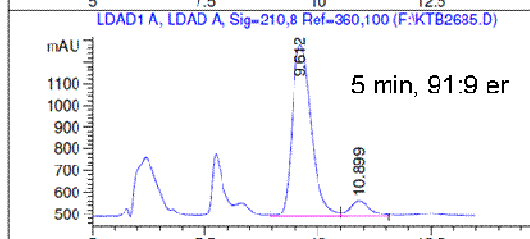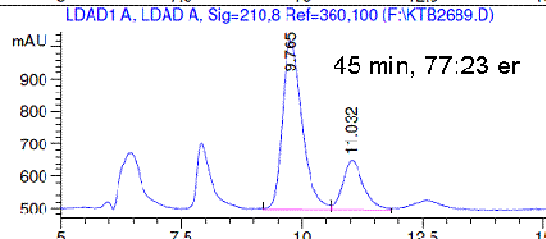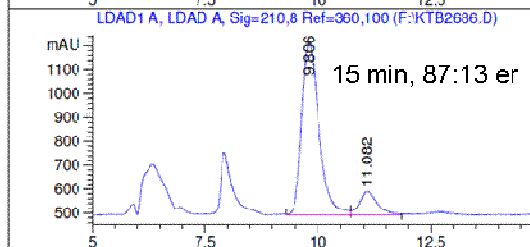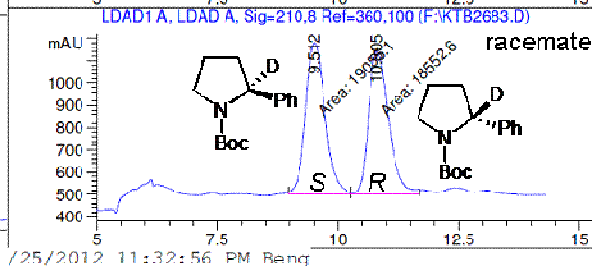

**Table 4.** Enantiomer ratios for enantiomerization of *S*-24 in the absence of any ligand in THF (lithiation with *n*-BuLi).

a) at  $-57\text{ }^{\circ}\text{C}$

| Time (h) | Fraction <i>S</i> |
|----------|-------------------|
| 0.5      | 0.88              |
| 1        | 0.8               |
| 2        | 0.701             |
| 4        | 0.628             |
| 8        | 0.51              |

c) at  $-31\text{ }^{\circ}\text{C}$

| Time (h) | Fraction <i>S</i> |
|----------|-------------------|
| 0.083333 | 0.754             |
| 0.25     | 0.652             |
| 0.5      | 0.603             |
| 1        | 0.519             |

b) at  $-43\text{ }^{\circ}\text{C}$

| Time (h) | Fraction <i>S</i> |
|----------|-------------------|
| 0.08333  | 0.872             |
| 0.5      | 0.658             |
| 1        | 0.578             |
| 2        | 0.512             |

Evolution of er in the enantiomerization of *S*-24 in the absence of any ligand in THF at various temperatures.

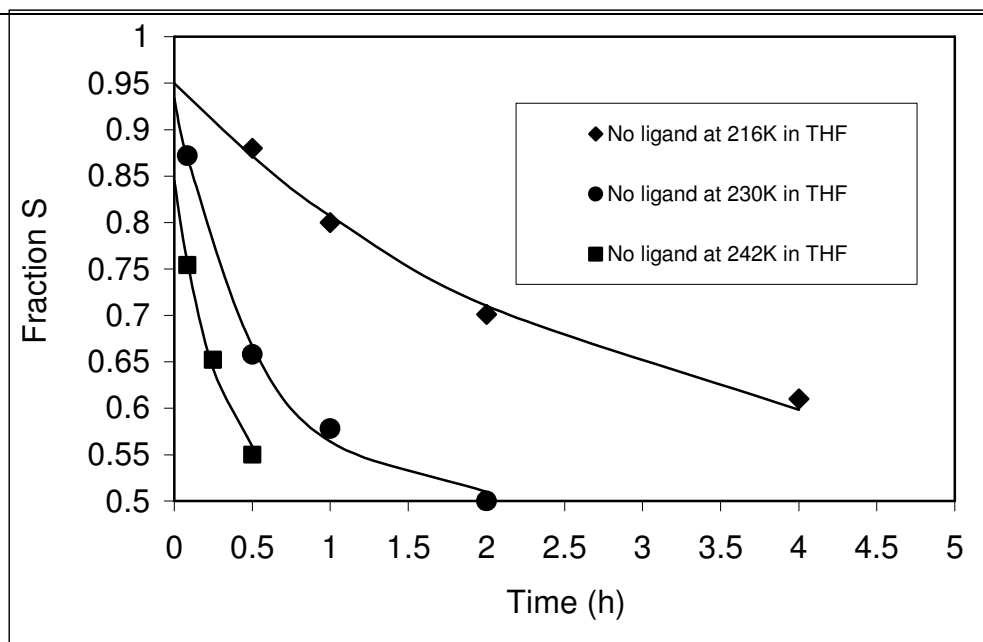

The rate constants were obtained from a nonlinear fit of the equation  $(S)_t = 0.5 + (S_{ini} - 0.50)(e^{-k_{rac}t})$

Since the initial values at  $t=0$ ,  $S_{ini}$ , were not determined experimentally,  $S_{ini}$  and  $k_{rac}$  were both treated as variable parameters.

Enantiomerization in the absence of any ligand at -31 °C in THF

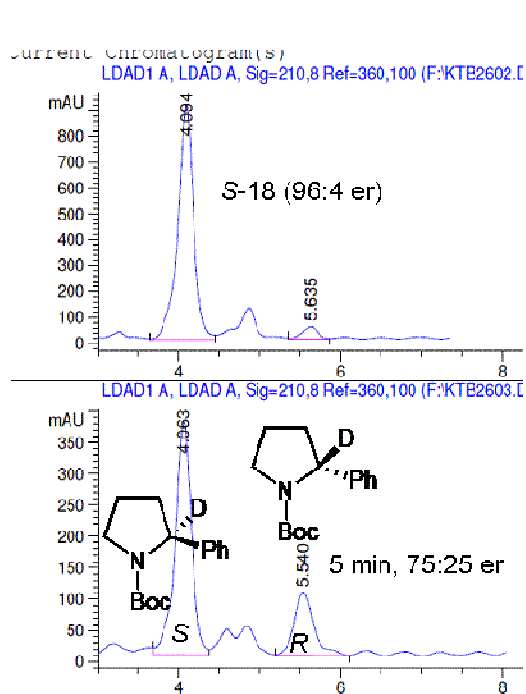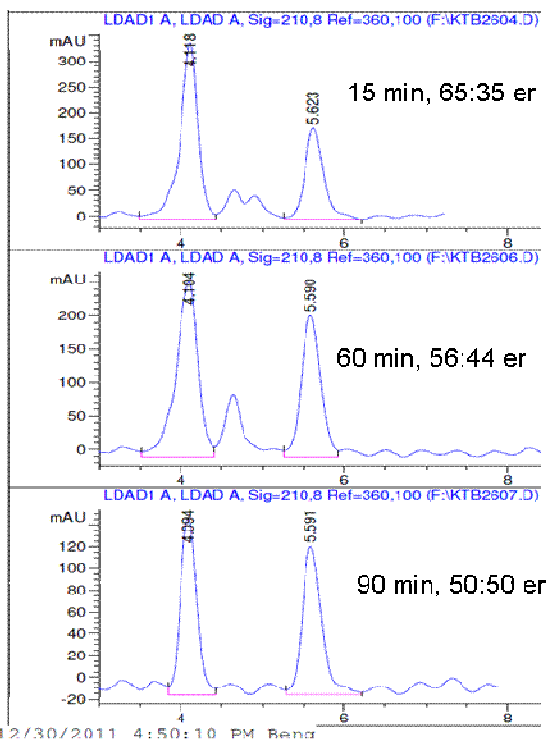

Enantiomerization in the absence of any ligand at -57 °C in THF

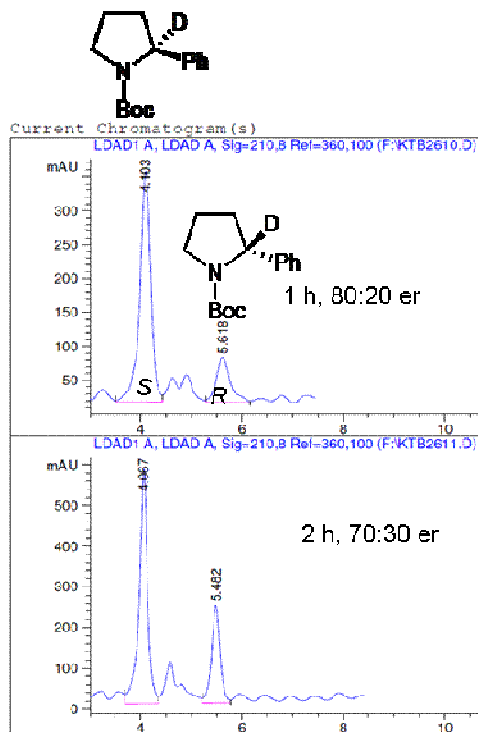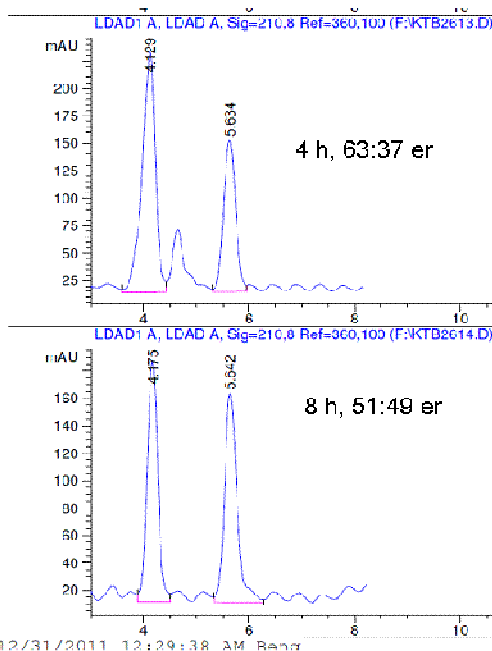

**Table 5.** Enantiomer ratios for enantiomerization of *R*-**24** in the absence of any ligand in 2-MeTHF at  $-31\text{ }^{\circ}\text{C}$

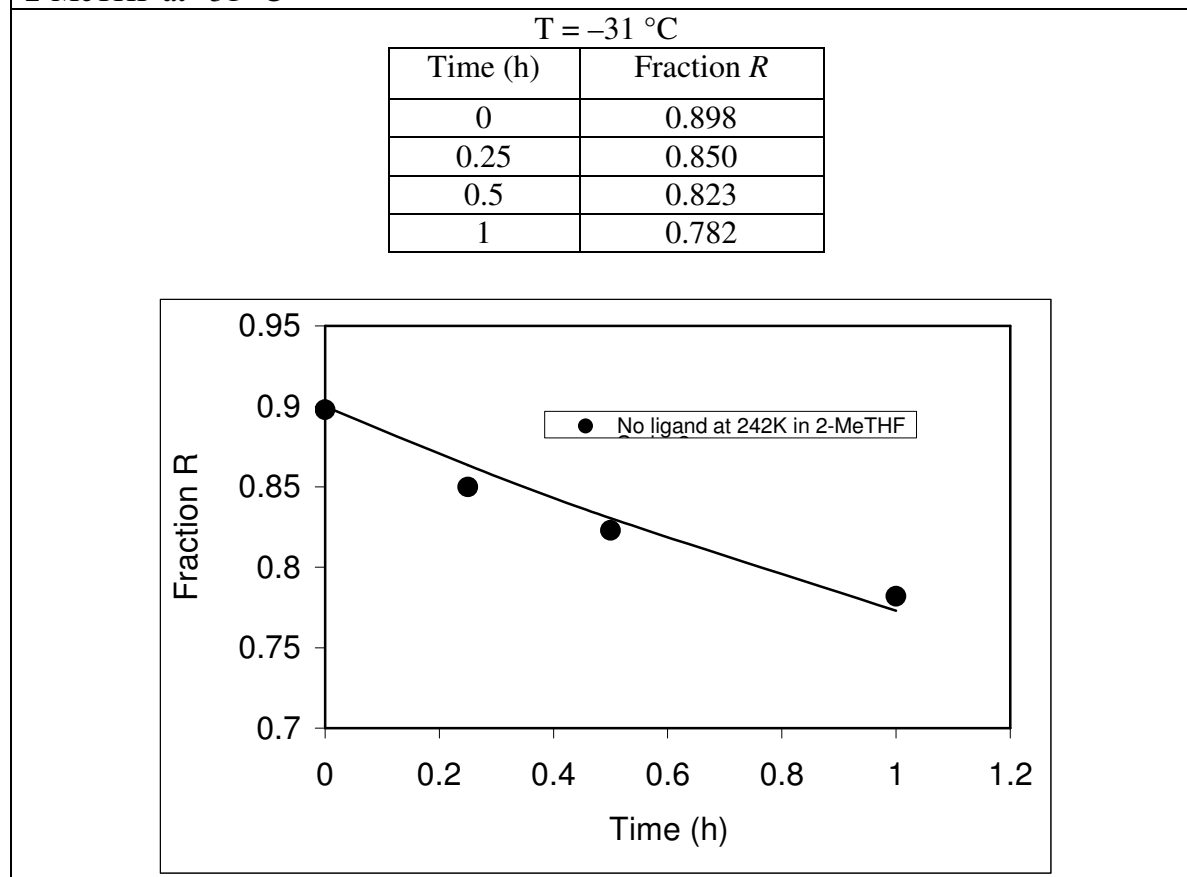

**Table 6.** Eyring plot parameters for enantiomerization of **24**

Eyring analysis of the rate constants at their respective temperatures was performed using the

equation 
$$\ln\left(\frac{k_{ent}}{T}\right) = -\frac{\Delta H^{\ddagger}}{RT} + \ln\frac{k_B}{h} + \frac{\Delta S^{\ddagger}}{R}$$
 where  $k_{ent}$  = rate constant for the

enantiomerization (*S* to *R* or *vice versa*),  $T$  = absolute temperature,  $\Delta H^{\ddagger}$  = enthalpy of activation,

$R$  = molar gas constant,  $k_B$  = Boltzmann's constant,  $h$  = Planck's constant,  $\Delta S^{\ddagger}$  = entropy of activation.

The analysis of the Eyring plots is based on the assumption that  $A$  (the Arrhenius pre-exponential factor),  $E_a$  (the activation energy), and  $\Delta H^{\ddagger}$  are independent of temperature.<sup>11</sup> This

approximation is generally considered valid over a small temperature range, such as used in these experiments.

**(a) No ligand in Et<sub>2</sub>O**

| Temp (K) | 1/T (K <sup>-1</sup> ) | $k_{rac}$ (x 10 <sup>-4</sup> s <sup>-1</sup> ) <sup>a</sup> | ln( $k_{rac}$ /T) | ln( $k_{ent}$ /T) |
|----------|------------------------|--------------------------------------------------------------|-------------------|-------------------|
| 253      | 0.00395257             | 0.358 ± 0.06                                                 | -15.770           | -16.463           |
| 266      | 0.0037594              | 3.184 ± 0.61                                                 | -13.636           | -14.329           |
| 273      | 0.003663               | 6.703 ± 0.93                                                 | -12.917           | -13.610           |
| 281      | 0.00355872             | 13.53 ± 1.04                                                 | -12.244           | -12.937           |

**(b) 1 equiv TMEDA in Et<sub>2</sub>O**

| Temp (K) | 1/T (K <sup>-1</sup> ) | $k_{rac}$ (x 10 <sup>-4</sup> s <sup>-1</sup> ) <sup>a</sup> | ln( $k_{rac}$ /T) | ln( $k_{ent}$ /T) |
|----------|------------------------|--------------------------------------------------------------|-------------------|-------------------|
| 266      | 0.0037594              | 0.528 ± 0.07                                                 | -15.433           | -16.126           |
| 273      | 0.003663               | 1.314 ± 0.03                                                 | -14.547           | -15.240           |
| 281      | 0.00355872             | 3.705 ± 0.07                                                 | -13.539           | -14.232           |
| 291      | 0.00343643             | 7.564 ± 1.04                                                 | -12.860           | -13.553           |

**(c) 1 equiv DIB in Et<sub>2</sub>O**

| Temp (K) | 1/T (K <sup>-1</sup> ) | $k_{rac}$ (x 10 <sup>-4</sup> s <sup>-1</sup> ) <sup>a</sup> | ln( $k_{rac}$ /T) | ln( $k_{ent}$ /T) |
|----------|------------------------|--------------------------------------------------------------|-------------------|-------------------|
| 271      | 0.00369004             | 0.4598 ± 0.008                                               | -15.589           | -16.282           |
| 281      | 0.00355872             | 1.910 ± 0.02                                                 | -14.201           | -14.894           |
| 287      | 0.00348432             | 4.429 ± 0.08                                                 | -13.382           | -14.075           |

**(d) No ligand in THF**

| Temp (K) | 1/T (K <sup>-1</sup> ) | $k_{rac}$ (x 10 <sup>-4</sup> s <sup>-1</sup> ) <sup>a</sup> | ln( $k_{rac}/T$ ) | ln( $k_{ent}/T$ ) |
|----------|------------------------|--------------------------------------------------------------|-------------------|-------------------|
| 216      | 0.00462963             | 1.06 ± 0.12                                                  | -14.531           | -15.224           |
| 230      | 0.00434783             | 5.3 ± 0.19                                                   | -12.980           | -13.674           |
| 242      | 0.00413223             | 9.8 ± 1.4                                                    | -12.416           | -13.109           |

a.  $k_{rac} = k_{RS} + k_{SR} = 2k_{ent}$

From an Eyring plot,

$$\Delta H^\ddagger = -\text{slope} \cdot R; \frac{Err(\Delta H)}{\Delta H} = \sqrt{\left(\frac{err(\text{slope})}{\text{slope}}\right)^2 + \left(\frac{err(R)}{R}\right)^2} = \sqrt{\left(\frac{err(\text{slope})}{\text{slope}}\right)^2} \text{ since } err(R) = 0$$

$$\text{Similarly, } \Delta S^\ddagger = \text{Intercept} \cdot R - R \ln(k_B/T); \frac{Err(\Delta S)}{\Delta S} = \sqrt{\left(\frac{err(\text{intercept})}{\text{intercept}}\right)^2 + \left(\frac{err(R)}{R}\right)^2} = \sqrt{\left(\frac{err(\text{intercept})}{\text{intercept}}\right)^2}$$

$$\Delta G^\ddagger = \Delta H^\ddagger - T\Delta S^\ddagger \text{ such that } \frac{Err(T\Delta S)}{T\Delta S} = \sqrt{\left(\frac{err(T)}{T}\right)^2 + \left(\frac{err(\Delta S)}{\Delta S}\right)^2}$$

$$Err(\Delta G) = \sqrt{(err(dH))^2 + (err(TdS))^2}$$

Eyring plots for enantiomerization of **24**.

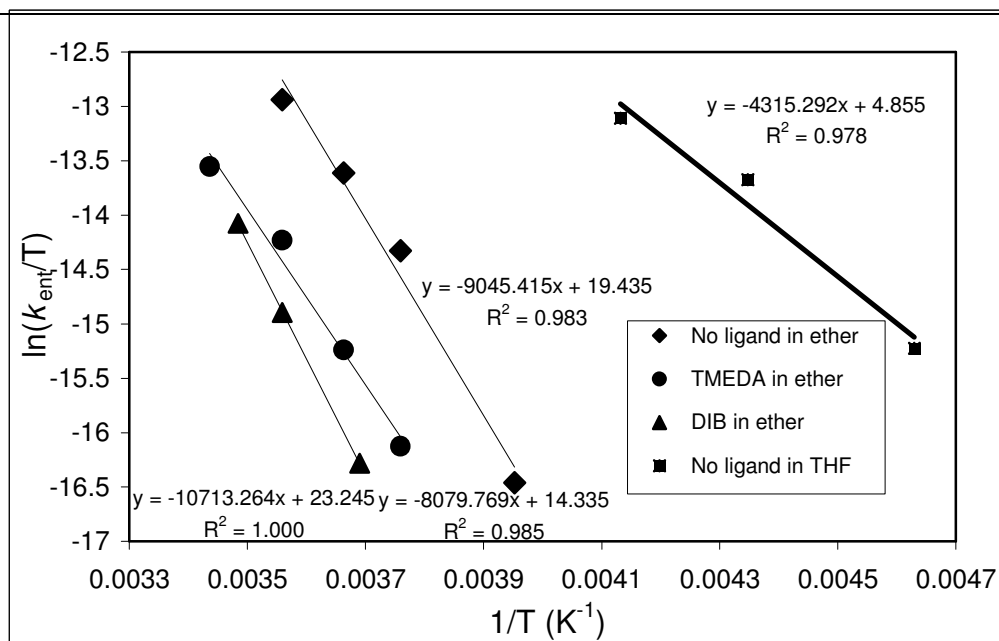

Relationship between free energy of activation and temperature for enantiomerization of **24**.

$$\Delta G^\ddagger = \Delta H^\ddagger - T\Delta S^\ddagger$$

| Entry | Description                            | $\Delta H^\ddagger$ (kcal/mol) | $\Delta S^\ddagger$ (cal/mol·K) |
|-------|----------------------------------------|--------------------------------|---------------------------------|
| 1     | No ligand in Et <sub>2</sub> O         | 18.0 ± 1.7                     | -8.6 ± 0.3                      |
| 2     | 1 equiv TMEDA in Et <sub>2</sub> O     | 16.0 ± 1.3                     | -18.7 ± 1.6                     |
| 3     | 1 equiv <b>23</b> in Et <sub>2</sub> O | 21.3 ± 0.2                     | -1.0 ± 0.4                      |
| 4     | No ligand in THF                       | 8.6 ± 1.6                      | -37.5 ± 2.5                     |

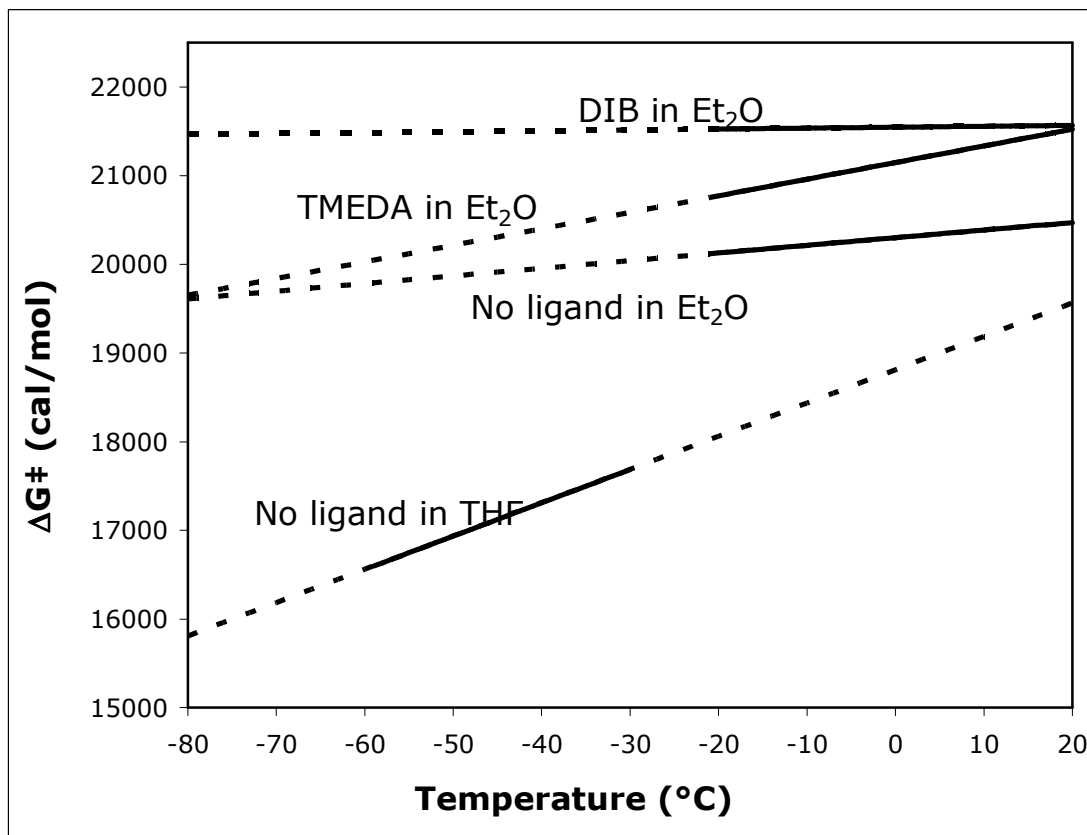

## 10. Dynamics of Inversion of **8**

### Typical kinetic run:

In oven-dried, septum-capped tubes equipped with a stir bar, **R-3** (0.06 M in ether, 0.5 mL) and 0.06 M TMEDA (0.00 or 1.00 equiv) were treated with *n*-BuLi (1.0 equiv) at  $-80\text{ }^{\circ}\text{C}$  for 1 h under nitrogen. The total volume of each tube was maintained at 1.0 mL. The tubes were quickly transferred to a second bath thermostated at the appropriate temperature (see tables below). At various time intervals over a four-hour period, a tube was transferred to the bath at  $-80\text{ }^{\circ}\text{C}$  and rapidly quenched with MeOD. Each tube was analyzed by GC-MS to ensure 100% deuterium incorporation (indicative of complete lithiation). The enantiomer ratio (er) of **3-d<sub>1</sub>** was determined by CSP-SFC monitoring at 210 nm under the following column conditions: **Column:** Pirkle Whelk-O-1, **Flow Rate** = 0.5 mL/min, **Polarity Modifier** = 10.0% IPA. **S-3-d<sub>1</sub>** elutes after ~17.2 min and **R-3-d<sub>1</sub>** elutes after ~21 min. In some cases, the enantiomer ratio (er) of **3-d<sub>1</sub>** was determined by CSP-HPLC monitoring at 254 nm. The rate constants were determined by non-linear fitting of the zero-order plots using reversible first-order kinetics. The rate constants were obtained from a nonlinear fit of the equation  $(R)_t = 0.5 + (R_{ini} - 0.5)(e^{-k_{rac}t})$

Since the initial values at  $t=0$ ,  $R_{ini}$ , were not determined experimentally,  $R_{ini}$ , and  $k_{rac}$  were both treated as variable parameters in the fitted equation;  $k_{rac}$  is the observed rate constant for the racemization. The enantiomerization rate constant,  $k_{ent} = k_{rac}/2$ .

**Table 1.** Enantiomer ratios for enantiomerization of **8** in the absence of any ligand in Et<sub>2</sub>O

|             |            |             |            |
|-------------|------------|-------------|------------|
| a) at 225 K |            | c) at 239 K |            |
| Time (h)    | Fraction R | Time (h)    | Fraction R |
|             |            |             |            |
| 1           | 0.91       | 0.25        | 0.84       |
| 2           | 0.86       | 0.5         | 0.74       |
| 3           | 0.80       | 1           | 0.64       |
| 4           | 0.78       | 2           | 0.53       |
| b) at 232 K |            | d) at 248 K |            |
| Time (h)    | Fraction R | Time (h)    | Fraction R |
|             |            |             |            |
| 0.5         | 0.9        | 0.1667      | 0.701      |
| 2           | 0.725      | 0.5         | 0.535      |
| 4           | 0.63       | 0.75        | 0.515      |
|             |            | 1           | 0.5        |



Evolution of er in the enantiomerization of **8** in the absence of any ligand in Et<sub>2</sub>O.

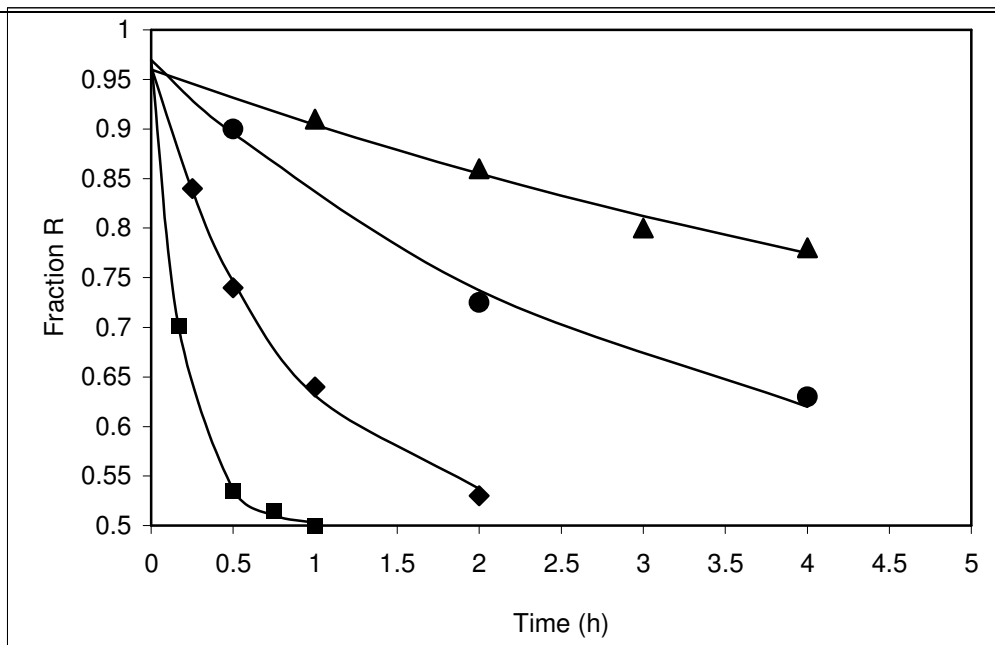

**KEY:** 225 K; triangles, 232 K; circles, 239 K; diamonds, 248 K; squares

Kinetics of racemization

CSP-HPLC traces for enantiomerization with no ligand in Et<sub>2</sub>O at -36 °C

AGILENT HPLC 5/26/2012

-----  
 Injection Date : 5/26/2012 5:24:47 PM  
 Sample Name : BocPip-2-Ph-2-Li Location  
 Acq. Operator : Beng  
 Acq. Method : C:\HPCHEM\1\METHODS\THOMAS-1.M  
 Last changed : 5/26/2012 4:53:46 PM by Beng  
 (modified after loading)  
 Analysis Method : C:\HPCHEM\1\METHODS\THOMAS-1.M  
 Last changed : 5/26/2012 7:03:08 PM by Beng  
 (modified after loading)

Pirkle Wheel-0-1  
 Flow rate = 2.0  
 Hex:IPA (98:2)

zorbax-sil. Using 2,6 piv online

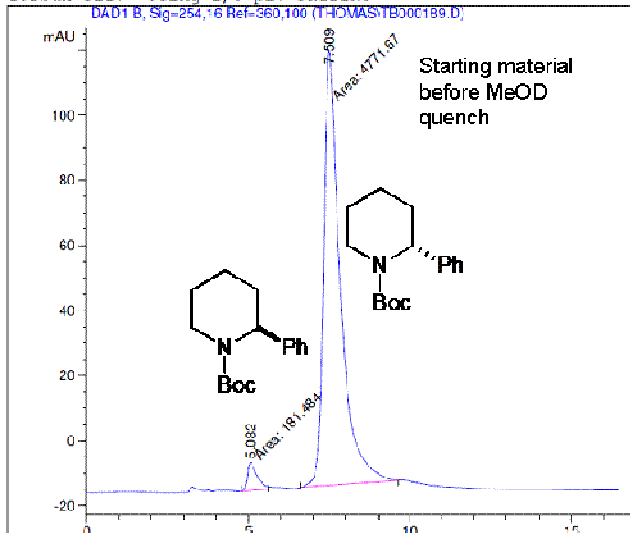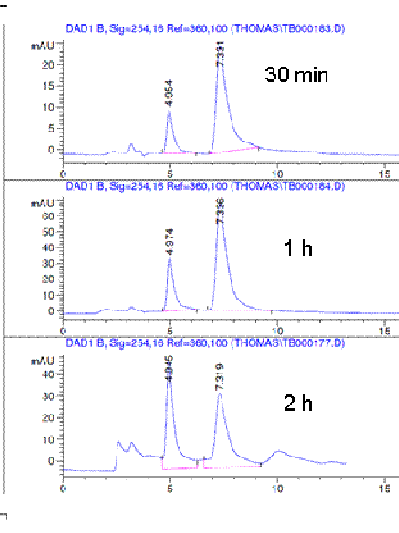

**Table 2.** Enantiomer ratios for enantiomerization of **8** in the presence of 1 equiv TMEDA in Et<sub>2</sub>O

| a) at 225 K |                   | c) at 243 K |                   |
|-------------|-------------------|-------------|-------------------|
| Time (h)    | Fraction <i>R</i> | Time (h)    | Fraction <i>R</i> |
|             |                   |             |                   |
| 1           | 0.93              | 0.25        | 0.82              |
| 3           | 0.88              | 0.5         | 0.73              |
| 6           | 0.8               | 0.75        | 0.65              |
| 9           | 0.755             | 1           | 0.61              |
|             |                   | 2           | 0.53              |

  

| b) at 233 K |                   | d) at 253 K |                   |
|-------------|-------------------|-------------|-------------------|
| Time (h)    | Fraction <i>R</i> | Time (h)    | Fraction <i>R</i> |
|             |                   |             |                   |
| 0.25        | 0.93              | 0.1667      | 0.75              |
| 0.5         | 0.9               | 0.5         | 0.58              |
| 1           | 0.87              | 0.75        | 0.535             |
| 2           | 0.78              | 1           | 0.50              |
| 4           | 0.68              |             |                   |

Evolution of er in the enantiomerization of **8** in the presence of 1 equiv TMEDA in Et<sub>2</sub>O at various temperatures.

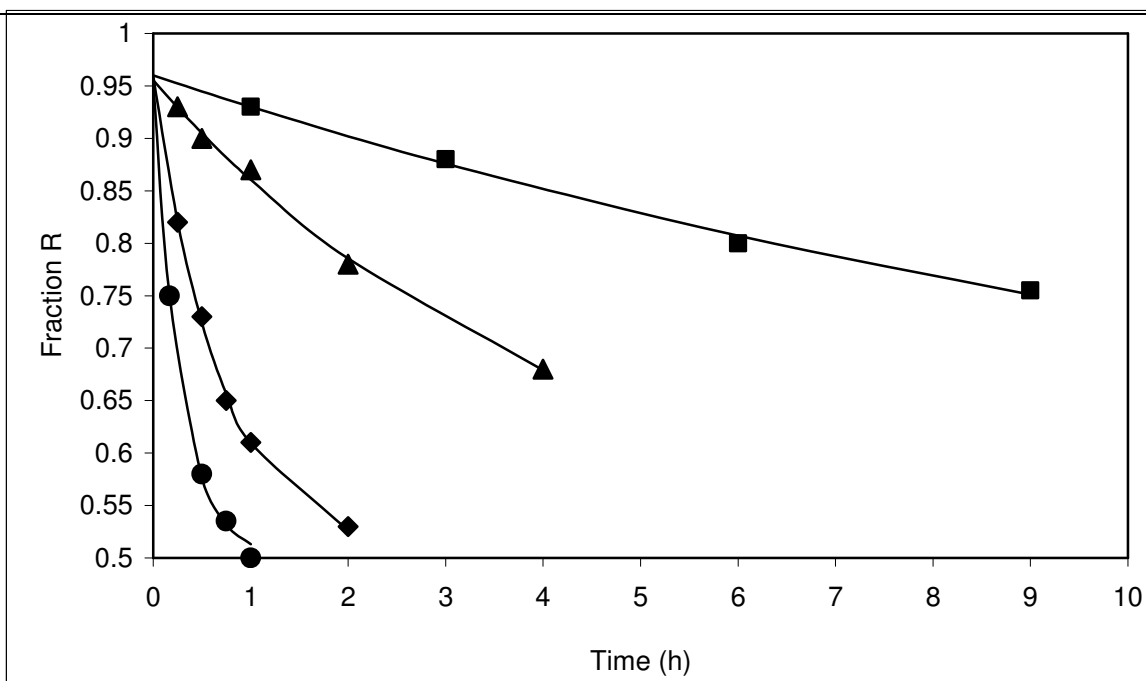

**KEY:** 225 K; circles, 233 K; diamonds, 243 K; triangles, 248 K; squares

**Table 4.** Enantiomer ratios for enantiomerization of **8** in the absence of any ligand in THF

| a) at 213 K |                   | c) at 233 K |                   |
|-------------|-------------------|-------------|-------------------|
| Time (h)    | Fraction <i>R</i> | Time (h)    | Fraction <i>R</i> |
|             |                   |             |                   |
| 0.5         | 0.835             | 0.083333    | 0.8               |
| 1           | 0.75              | 0.25        | 0.652             |
| 2           | 0.64              | 0.5         | 0.55              |
| 4           | 0.55              |             |                   |

  

| b) at 223 K |                   | d) at 243 K |                   |
|-------------|-------------------|-------------|-------------------|
| Time (h)    | Fraction <i>R</i> | Time (h)    | Fraction <i>R</i> |
|             |                   |             |                   |
| 0.083333    | 0.89              | 0.083333    | 0.6               |
| 0.5         | 0.658             | 0.25        | 0.51              |
| 1           | 0.55              | 0.41667     | 0.5               |
| 2           | 0.5               | 0.75        | 0.5               |

Evolution of *er* in the enantiomerization of **8** in the absence of any ligand in THF at various temperatures.

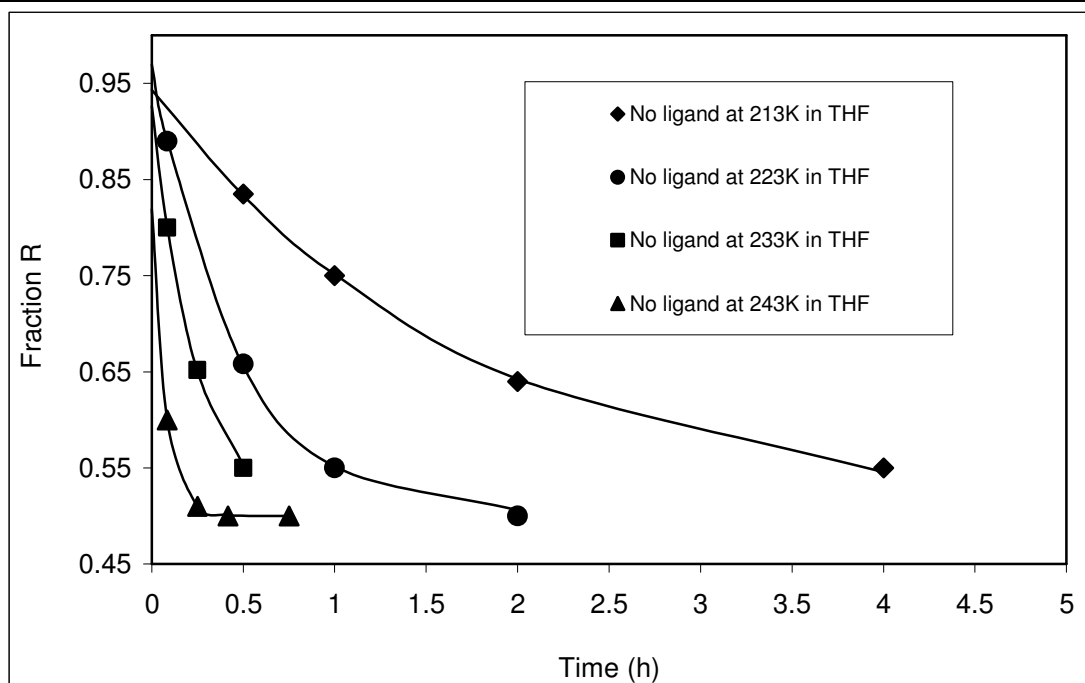

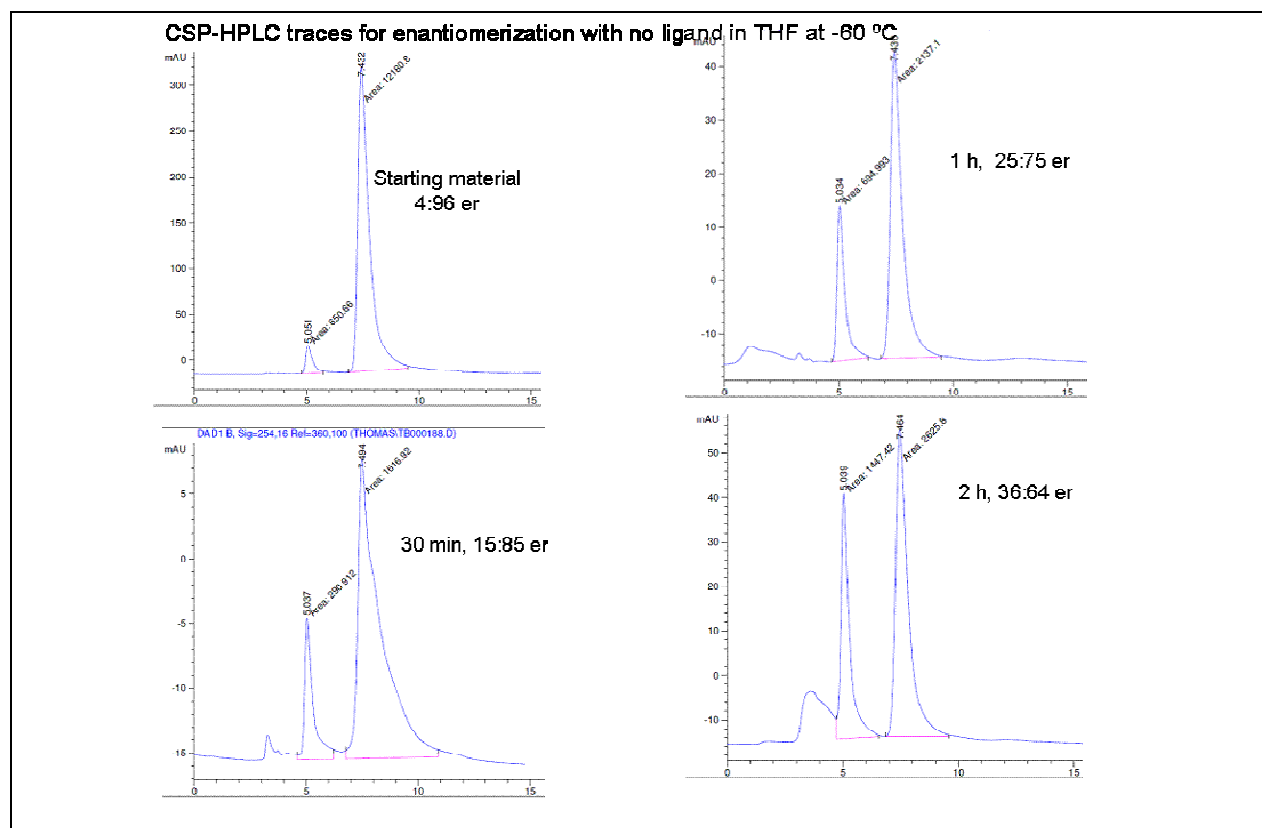

**Table 6.** Eyring plot parameters for enantiomerization of **8**

**a) No ligand in Et<sub>2</sub>O**

| Temp, K | 1/T        | $k_{rac}$   | $k_{ent}$   | $\ln(k_{ent}/T)$ |
|---------|------------|-------------|-------------|------------------|
| 225     | 0.00444444 | 3.58413E-05 | 1.79206E-05 | -16.3456584      |
| 232     | 0.00431034 | 9.48636E-05 | 4.74318E-05 | -15.4029551      |
| 239     | 0.0041841  | 0.000350222 | 0.000175111 | -14.1265529      |
| 248     | 0.00403226 | 0.00141522  | 0.00070761  | -12.7670461      |

**b) 1 equiv TMEDA in Et<sub>2</sub>O**

| Temp, K | 1/T        | $k_{rac}$   | $k_{ent}$   | $\ln(k_{ent}/T)$ |
|---------|------------|-------------|-------------|------------------|
| 225     | 0.00444444 | 1.87E-05    | 9.35035E-06 | -16.9961975      |
| 233     | 0.00429185 | 6.48182E-05 | 3.24091E-05 | -15.7881093      |
| 243     | 0.00411523 | 0.000398194 | 0.000199097 | -14.0147796      |
| 253     | 0.00395257 | 0.000985167 | 0.000492583 | -13.1492365      |

**c) No ligand in THF**

| Temp, K | 1/T        | $k_{rac}$   | $k_{ent}$   | $\ln(k_{ent}/T)$ |
|---------|------------|-------------|-------------|------------------|
| 213     | 0.00469484 | 0.000157504 | 7.8752E-05  | -14.8104985      |
| 223     | 0.0044843  | 0.000612632 | 0.000306316 | -13.4980645      |
| 233     | 0.00429185 | 0.001162146 | 0.000581073 | -12.9016728      |
| 243     | 0.00411523 | 0.003868864 | 0.001934432 | -11.741003       |

Eyring plots for enantiomerization of **8**.

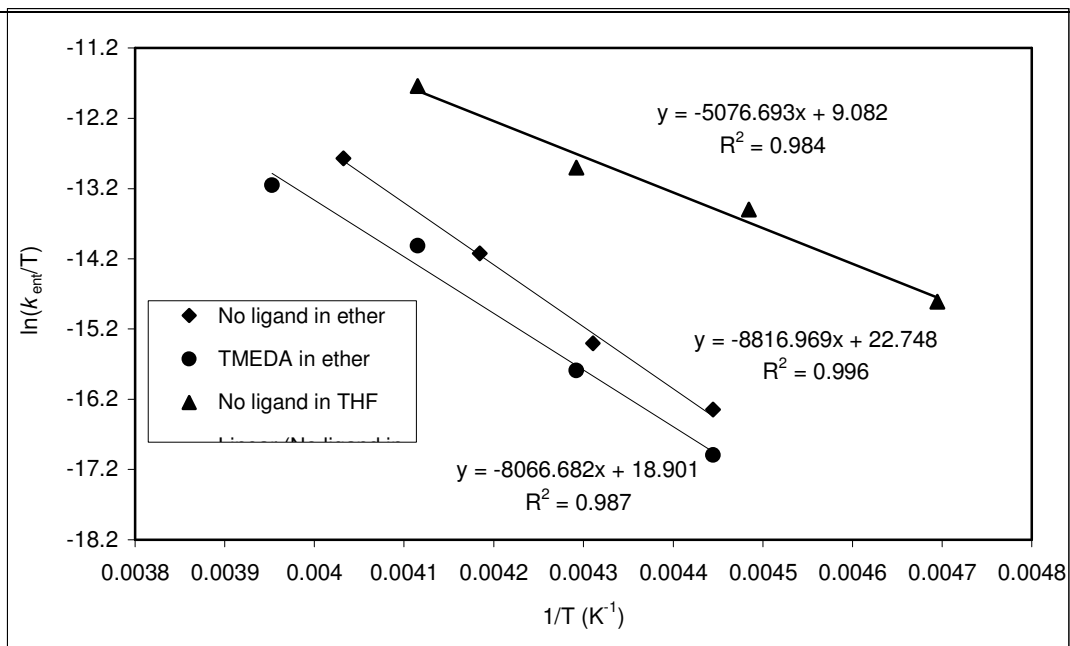

Relationship between free energy of activation and temperature for enantiomerization of **8**.

| Entry | Description                        | $\Delta G^\ddagger = \Delta H^\ddagger - T\Delta S^\ddagger$ |                                 |
|-------|------------------------------------|--------------------------------------------------------------|---------------------------------|
|       |                                    | $\Delta H^\ddagger$ (kcal/mol)                               | $\Delta S^\ddagger$ (cal/mol·K) |
| 1     | No ligand in Et <sub>2</sub> O     | 17.5 ± 0.8                                                   | -2.0 ± 0.06                     |
| 2     | 1 equiv TMEDA in Et <sub>2</sub> O | 16.0 ± 1.3                                                   | -9.6 ± 0.5                      |
| 3     | No ligand in THF                   | 10.1 ± 0.9                                                   | -29.1 ± 4.2                     |

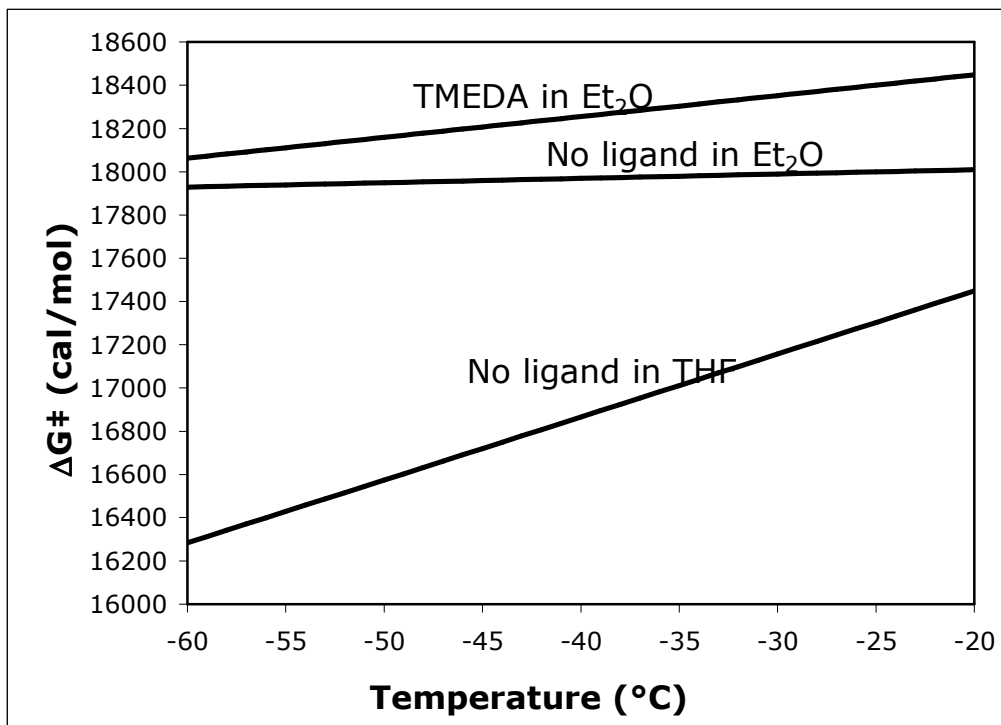

## 11. References

1. Hoye, T. R.; Eklov, B. M.; Ryba, T. D.; Voloshin, M.; Yao, L. J., *Org. Lett.* **2004**, *6* (6), 953-956.
2. Beng, T. K.; Gawley, R. E., *J. Am. Chem. Soc.* **2010**, *132* (35), 12216-12217.
3. Beng, T. K.; Gawley, R. E., *Org. Lett.* **2011**, *13* (3), 394-397.
4. Wu, S.; Lee, S.; Beak, P., *J. Am. Chem. Soc.* **1996**, *118*, 715-721.
5. Barker, G.; McGrath, J. L.; Klapars, A.; Stead, D.; Zhou, G.; Campos, K. R.; O'Brien, P., *J. Org. Chem.* **2011**, *76* (15), 5936-5953.
6. Seel, S.; Thaler, T.; Takatsu, K.; Zhang, C.; Zipse, H.; Straub, B. F.; Mayer, P.; Knochel, P., *J. Am. Chem. Soc.* **2011**, *133* (13), 4774-4777.
7. Xiao, D.; Lavey, B. J.; Palani, A.; Wang, C.; Aslanian, R. G.; Kozlowski, J. A.; Shih, N.-Y.; McPhail, A. T.; Randolph, G. P.; Lachowicz, J. E.; Duffy, R. A., *Tetrahedron Lett.* **2005**, *46* (44), 7653-7656.
8. Bagutski, V.; Elford, T. G.; Aggarwal, V. K., *Angew. Chem., Int. Ed.* **2011**, *50* (5), 1080-1083, S1080/1-S1080/57.
9. Campos, K. R.; Klapars, A.; Waldman, J. H.; Dormer, P. G.; Chen, C., *J. Am. Chem. Soc.* **2006**, *128* (11), 3538-3539.
10. Barker, G.; O'Brien, P.; Campos, K. R., *Org. Lett.* **2010**, *12* (18), 4176-4179.
11. Espenson, J. H., *Chemical Kinetics and Reaction Mechanisms*. 2 ed.; McGraw-Hill: New York, 2002; p 281.
